# Supplementary material for: Structure–antitumor activity relationship of hybrid acetogenins focusing on connecting groups between heterocycles and the linker moiety
Source: Royal Society of Chemistry journal article supplement (doi:10.1039/d2ra02399g), 2022-01-01

Electronic Supplementary Information

## Structure-antitumor activity relationships of hybrid acetogenins focusing on connecting groups between heterocycles and the linker moiety

Kaito Ohta,<sup>a</sup> Tetsuya Fushimi,<sup>b</sup> Mutsumi Okamura,<sup>c</sup> Akinobu Akatsuka,<sup>c</sup>  
Shingo Dan,<sup>c</sup> Hiroki Iwasaki,<sup>a</sup> Masayuki Yamashita,<sup>a</sup> and Naoto Kojima<sup>\*a</sup>

<sup>a</sup>Kyoto Pharmaceutical University, 1 Misasagi-Shichono-cho, Yamashina-ku, Kyoto 607-8412, Japan

<sup>b</sup>Graduate School of Pharmaceutical Sciences, Osaka University, 1-6 Yamadaoka, Suita, Osaka 565-0871,  
Japan

<sup>c</sup>Cancer Chemotherapy Center, Japanese Foundation for Cancer Research, 3-8-31 Ariake, Koto-ku, Tokyo  
135-8550, Japan.

*E-mail address: kojima@mb.kyoto-phu.ac.jp*

|                                                                                                                                 |        |
|---------------------------------------------------------------------------------------------------------------------------------|--------|
| <b>Scheme S1</b> Synthesis of analogs <b>1</b> and <b>71</b>                                                                    | S1-4   |
| <b>Scheme S2</b> Synthesis of substituted pyrazoles <b>S6</b> and <b>23</b>                                                     | S4-6   |
| <b>Scheme S3</b> Synthesis of pyrazole-sulfonyl chloride <b>S8a</b> and <b>S8b</b>                                              | S6-7   |
| <b>Scheme S4</b> Synthesis of benzyl ester <b>17</b>                                                                            | S7     |
| <b>Table S1</b> Growth inhibitory activity against human cancer cell lines                                                      | S8     |
| <b>Fig. S1</b> Comparison of growth inhibitory activities of analogs                                                            | S9-11  |
| <b>Fig. S2</b> Correlation between XLOGP3 and GI <sub>50</sub>                                                                  | S12-14 |
| <b>Table S2</b> QSAR models of the relationships between the Log(1/GI <sub>50</sub> ) and XLOP3 of partial structure of analogs | S15-16 |
| <sup>1</sup> H-NMR/ <sup>13</sup> C-NMR Spectra:                                                                                | S17-74 |

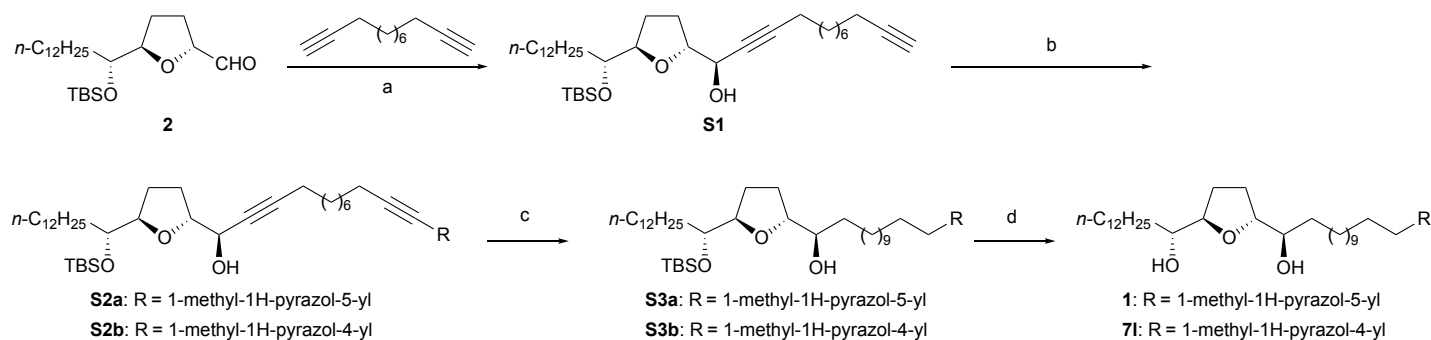

**Scheme S1** Synthesis of **1** and **7I**; Reagents and conditions: (a)  $\text{Zn}(\text{OTf})_2$ ,  $\text{Et}_3\text{N}$ , (1*R*,2*S*)-*N*-methylephedrine, toluene, rt, 87%, dr = >97:3; (b) R-I,  $\text{Pd}(\text{PPh}_3)_4$ , CuI,  $\text{Et}_2\text{NH}$ , 50 °C, **S2a** (93%); **S2b** (86%); (c) 10% Pd-C,  $\text{H}_2$  (3 atm), EtOAc, rt, **S3a** (82%); **S3b** (76%); (d) 48% HF aq, THF/ $\text{CH}_3\text{CN}$ , rt, **1** (98%); **7I** (93%).

**(1*R*)-{(2*R*,5*R*)-5-[(1*R*)-1-(*tert*-Butyldimethylsilyloxy)tridecyl]tetrahydrofuran-2-yl}trideca-2,12-diyn-1-ol (S1)**

A flask was charged with  $\text{Zn}(\text{OTf})_2$  (124 mg, 0.341 mmol). Vacuum (12 mmHg) was applied and the flask was heated to 120 °C for 6 h. After the flask was cooled to rt, the vacuum was released. Then, (1*R*,2*S*)-(-)-*N*-methylephedrine (66.8 mg, 0.373 mmol), toluene (0.4 mL), and  $\text{Et}_3\text{N}$  (0.052 mL, 0.37 mmol) were added to the flask with stirring at rt. After 3 h at the same temperature, a solution of 1,11-dodecadiyne (105 mg, 0.649 mmol) in toluene (0.2 mL) was added to the mixture at the same temperature. After 15 min at the same temperature, **2** (67.0 mg, 0.162 mmol) in toluene (0.3 mL) was added to the reaction mixture and the whole mixture was stirred for 22 h at rt. The reaction was quenched with saturated  $\text{NH}_4\text{Cl}$  and the mixture was extracted with EtOAc. The combined organic layers were washed with brine prior to drying and solvent evaporation. Purification by flash column chromatography over silica gel with *n*-hexane/EtOAc (20:1) as eluent yielded **S1** (76.9 mg, 83%, dr = >97:3) as a colorless oil.  $[\alpha]_D^{24} +12.1$  (*c* 0.850 in  $\text{CHCl}_3$ );  $^1\text{H}$  NMR (500 MHz,  $\text{CDCl}_3$ )  $\delta$ : 0.06 (s, 3H,  $\text{SiCH}_3$ ), 0.08 (s, 3H), 0.88 (t, 3H,  $J = 6.7$  Hz), 0.89 (s, 9H), 1.26–1.56 (m, 34H), 1.66–1.77 (m, 2H), 1.89–1.94 (m, 1H), 1.94 (t, 1H,  $J = 3.1$  Hz), 2.02–2.08 (m, 1H), 2.18 (td, 2H,  $J = 6.7, 3.1$  Hz), 2.19 (td, 2H,  $J = 7.0, 4.9$  Hz), 2.46 (d, 1H,  $J = 2.5$  Hz), 3.56–3.59 (m, 1H), 3.91 (q, 1H,  $J = 6.7$  Hz), 4.00 (q, 1H,  $J = 6.7$  Hz), 4.14–4.18 (m, 1H);  $^{13}\text{C}$  NMR (75 MHz,  $\text{CDCl}_3$ )  $\delta$ : -4.7, -4.2, 14.1, 18.2, 18.3, 18.6, 22.6, 25.5, 25.9 (3C), 27.6, 28.2, 28.36, 28.42, 28.6, 28.7, 28.9, 29.3 (2C), 29.55 (2C), 29.58 (2C), 29.62, 29.8, 31.9, 32.8, 65.5, 68.1, 74.8, 78.0, 82.4, 82.6, 84.6, 86.2; IR (KBr)  $\text{cm}^{-1}$ : 3315; MS (FAB)  $m/z$ : 575 [ $M+\text{H}$ ] $^+$ ; HRMS (FAB)  $m/z$ : calcd for  $\text{C}_{36}\text{H}_{67}\text{O}_3\text{Si}$ : 575.4859; found: 575.4866 [ $M+\text{H}$ ] $^+$ .

**5-[(13*R*)-13-{(2*R*,5*R*)-5-[(1*R*)-1-(*tert*-Butyldimethylsilyloxy)tridecyl]tetrahydrofuran-2-yl}-13-hydroxytridec-1,11-diynyl]-1-methyl-1*H*-pyrazole (S2a)**

$\text{Pd}(\text{Ph}_3\text{P})_4$  (13.9 mg, 12.0  $\mu\text{mol}$ ) and CuI (I) (0.6 mg, 3.0  $\mu\text{mol}$ ) were added to a solution of 5-iodo-1-methyl-1*H*-pyrazole (25.0 mg, 0.120 mmol) in  $\text{Et}_2\text{NH}$  (0.4 mL) with stirring at rt. After stirring for 5 min at 50 °C, **S1** (34.5 mg, 0.0601 mmol) in  $\text{Et}_2\text{NH}$  (0.3 mL) was added to the mixture at the same temperature over 10 min. After stirring for 24 h at the same temperature,  $\text{Pd}(\text{Ph}_3\text{P})_4$  (7.0 mg, 6.0  $\mu\text{mol}$ ) and CuI (I) (0.3 mg, 1.5  $\mu\text{mol}$ ) were added to the reaction mixture. After stirring for 21 h at the same temperature, the mixture was diluted with  $\text{Et}_2\text{O}$ , and the catalyst was filtered off prior to solvent evaporation. Purification by flash column

chromatography over silica gel with *n*-hexane/EtOAc (15:1 to 7:1) as eluent yielded **S2a** (36.6 mg, 93%) as a colorless oil.  $[\alpha]_D^{21} +10.2$  (*c* 0.800 in CHCl<sub>3</sub>); <sup>1</sup>H NMR (500 MHz, CDCl<sub>3</sub>)  $\delta$ : 0.06 (s, 3H), 0.08 (s, 3H), 0.88 (t, 3H, *J* = 6.7 Hz), 0.89 (s, 9H), 1.26–1.79 (m, 36H), 1.88–1.94 (m, 1H), 2.02–2.07 (m, 1H), 2.20 (td, 2H, *J* = 7.0, 1.8 Hz), 2.45 (t, 2H, *J* = 7.0 Hz), 2.52 (d, 1H, *J* = 3.7 Hz), 3.57 (td, 1H, *J* = 6.4, 3.7 Hz), 3.90–3.93 (m, 4H), 4.00 (dt, 1H, *J* = 7.3, 6.7 Hz), 4.15–4.17 (m, 1H), 6.31 (d, 1H, *J* = 1.8 Hz), 7.40 (d, 1H, *J* = 1.8 Hz); <sup>13</sup>C NMR (75 MHz, CDCl<sub>3</sub>)  $\delta$ : –4.8, –4.3, 14.0, 18.1, 18.6, 19.4, 22.6, 25.4, 25.8 (3C), 27.5, 28.3, 28.4, 28.4, 28.66, 28.74, 28.85, 28.86, 29.2, 29.49, 29.53 (3C), 29.6, 29.7, 31.8, 32.8, 36.9, 65.6, 69.2, 74.9, 78.1, 82.4, 82.6, 86.2, 98.2, 109.2, 126.2, 138.3; IR (KBr) cm<sup>–1</sup>: 3338; MS (FAB) *m/z*: 655 [*M*+H]<sup>+</sup>; HRMS (FAB) *m/z*: calcd for C<sub>40</sub>H<sub>71</sub>N<sub>2</sub>O<sub>3</sub>Si: 655.5234; found: 655.5240 [*M*+H]<sup>+</sup>.

**4-[(13*R*)-13-[(2*R*,5*R*)-5-[(1*R*)-1-(*tert*-Butyldimethylsilyloxy)tridecyl]tetrahydrofuran-2-yl]-13-hydroxy-tridec-1,11-diynyl]-1-methylpyrazole (S2b)** The procedure was the same as that used for the preparation of **S2a** by use of 4-iodo-1-methyl-1*H*-pyrazole instead of 5-iodo-1-methyl-1*H*-pyrazole, giving **S2b** (Yield: 86%) as a yellow oil.  $[\alpha]_D^{24} +8.7$  (*c* 1.01 in CHCl<sub>3</sub>); <sup>1</sup>H NMR (500 MHz, CDCl<sub>3</sub>)  $\delta$ : 0.06 (s, 3H), 0.08 (s, 3H), 0.88 (t, 3H, *J* = 6.7 Hz), 0.89 (s, 9H), 1.21–1.59 (m, 34H), 1.64–1.81 (m, 2H), 1.87–1.95 (m, 1H), 2.00–2.07 (m, 1H), 2.19 (td, 2H, *J* = 7.0, 1.8 Hz), 2.35 (t, 2H, *J* = 7.0 Hz), 2.55 (br s, 1H), 3.55–3.60 (m, 1H), 3.86 (s, 3H), 3.91 (td, 1H, *J* = 7.9, 6.4 Hz), 4.00 (q, 1H, *J* = 6.7 Hz), 4.15–4.18 (m, 1H), 7.41 (s, 1H), 7.51 (s, 1H); <sup>13</sup>C NMR (75 MHz, CDCl<sub>3</sub>)  $\delta$ : –4.6, –4.2, 14.1, 18.2, 18.7, 19.4, 22.7, 25.5, 25.9 (3C), 27.6, 28.3, 28.5, 28.7, 28.8, 28.9, 28.97, 28.98, 29.3, 29.58, 29.62 (3C), 29.7, 29.8, 31.9, 32.9, 39.0, 65.6, 71.2, 74.9, 78.1, 82.5, 82.6, 86.3, 90.6, 103.9, 132.1, 141.8; IR (KBr) cm<sup>–1</sup>: 3429, 2360; MS (FAB) *m/z*: 655 [*M*+H]<sup>+</sup>; HRMS (FAB) *m/z*: calcd for C<sub>40</sub>H<sub>71</sub>N<sub>2</sub>O<sub>3</sub>Si: 655.5234; found: 655.5256 [*M*+H]<sup>+</sup>.

**5-[(13*R*)-13-[(2*R*,5*R*)-5-[(1*R*)-1-(*tert*-Butyldimethylsilyloxy)tridecyl]tetrahydrofuran-2-yl]-13-hydroxy-tridecyl]-1-methyl-1*H*-pyrazole (S3a)** The procedure was the same as that used for the preparation of **20** by use of **S2a** instead of **19**, giving **S3a** (Yield: 82%) as a colorless oil.  $[\alpha]_D^{25} +8.0$  (*c* 0.74 in CHCl<sub>3</sub>); <sup>1</sup>H NMR (500 MHz, CDCl<sub>3</sub>)  $\delta$ : 0.06 (s, 3H), 0.08 (s, 3H), 0.87–0.89 (m, 12H), 1.26–1.41 (m, 42H), 1.58–1.68 (m, 4H), 1.88–1.95 (m, 2H), 2.42 (br s, 1H), 2.57 (t, 2H, *J* = 7.9 Hz), 3.35–3.39 (m, 1H), 3.55 (td, 1H, *J* = 6.1, 3.7 Hz), 3.75–3.78 (m, 4H), 3.86 (dt, 1H, *J* = 7.9, 6.1 Hz), 6.00 (d, 1H, *J* = 1.8 Hz), 7.37 (d, 1H, *J* = 1.8 Hz); <sup>13</sup>C NMR (75 MHz, CDCl<sub>3</sub>)  $\delta$ : –4.6, –4.2, 14.1, 18.3, 22.7, 25.4, 25.5, 25.6, 25.9 (3C), 28.4 (2C), 28.5, 29.2, 29.3 (2C), 29.5, 29.56 (4C), 29.61 (3C), 29.64 (2C), 29.7, 29.8, 31.9, 33.2, 33.5, 36.0, 74.1, 75.2, 82.3, 82.4, 104.0, 137.9, 143.0; IR (KBr) cm<sup>–1</sup>: 3464; MS (FAB) *m/z*: 663 [*M*+H]<sup>+</sup>; HRMS (FAB) *m/z*: calcd for C<sub>40</sub>H<sub>79</sub>N<sub>2</sub>O<sub>3</sub>Si: 663.5860; found: 663.5878 [*M*+H]<sup>+</sup>.

**4-[(13*R*)-13-[(2*R*,5*R*)-5-[(1*R*)-1-(*tert*-Butyldimethylsilyloxy)tridecyl]tetrahydrofuran-2-yl]-13-hydroxy-tridecyl]-1-methyl-1*H*-pyrazole (S3b)** The procedure was the same as that used for the preparation of **20** by use of **S2b** instead of **19**, giving **S3b** (Yield: 76%) as a colorless oil.  $[\alpha]_D^{24} +9.5$  (*c* 0.56 in CHCl<sub>3</sub>); <sup>1</sup>H NMR (500 MHz, CDCl<sub>3</sub>)  $\delta$ : 0.06 (s, 3H), 0.08 (s, 3H), 0.87–0.89 (m, 12H), 1.26–1.68 (m, 46H), 1.88–1.97 (m, 2H), 2.41 (br s, 1H), 2.42 (t, 2H, *J* = 7.6 Hz), 3.35–3.39 (m, 1H), 3.55 (td, 1H, *J* = 6.1, 3.7 Hz), 3.76 (q, 1H, *J* = 6.7

(Hz), 3.83–3.88 (m, 4H), 7.12 (s, 1H), 7.29 (s, 1H);  $^{13}\text{C}$  NMR (75 MHz,  $\text{CDCl}_3$ )  $\delta$ : -4.6, -4.2, 14.1, 18.2, 22.6, 24.1, 25.4, 25.6, 25.9 (3C), 28.4, 28.5, 29.2, 29.3, 29.4, 29.57 (4C), 29.61 (4C), 29.64 (2C), 29.7, 29.8, 31.0, 31.9, 33.1, 33.4, 38.7, 74.1, 75.2, 82.2, 82.4, 122.1, 128.0, 138.6; IR (KBr)  $\text{cm}^{-1}$ : 3431; MS (FAB)  $m/z$ : 663  $[M+H]^+$ ; HRMS (FAB)  $m/z$ : calcd for  $\text{C}_{40}\text{H}_{79}\text{N}_2\text{O}_3\text{Si}$ : 663.5860; found: 663.5857  $[M+H]^+$ .

**5-[(13R)-13-Hydroxy-13-[(2R,5R)-5-[(1R)-1-hydroxytridecyl]tetrahydrofuran-2-yl]tridecyl]-1-methyl-1H-pyrazole (1)** The procedure was the same as that used for the preparation of **7d** by use of **S3a** instead of **6d**, giving **1** (Yield: 98%) as a white waxy solid. M.p. 68.3–69.3 °C;  $[\alpha]^{24}_{\text{D}}$  +11.4 (*c* 0.880 in  $\text{CHCl}_3$ );  $^1\text{H}$  NMR (500 MHz,  $\text{CDCl}_3$ )  $\delta$ : 0.88 (t, 3H, *J* = 7.0 Hz), 1.26–1.41 (m, 42H), 1.60–1.72 (m, 4H), 1.95–2.01 (m, 2H), 2.57 (t, 2H, *J* = 7.6 Hz), 3.39–3.42 (m, 2H), 3.78 (s, 3H), 3.78–3.82 (m, 2H), 6.01 (d, 1H, *J* = 1.5 Hz), 7.37 (d, 1H, *J* = 1.5 Hz);  $^{13}\text{C}$  NMR (75 MHz,  $\text{CDCl}_3$ )  $\delta$ : 14.1, 22.7, 25.5, 25.6, 28.4, 28.7, 29.2, 29.3 (2C), 29.5, 29.56 (4C), 29.59 (2C), 29.61 (2C), 29.62 (2C), 29.64 (2C), 29.7 (2C), 31.9, 33.4, 36.0, 74.0 (2C), 82.6 (2C), 104.0, 137.9, 143.0; IR (KBr)  $\text{cm}^{-1}$ : 3448, 3354; MS (FAB)  $m/z$ : 549  $[M+H]^+$ ; HRMS (FAB)  $m/z$ : calcd for  $\text{C}_{34}\text{H}_{65}\text{N}_2\text{O}_3$ : 549.4995; found: 549.5009  $[M+H]^+$ .

**4-[(13R)-13-Hydroxy-13-[(2R,5R)-5-[(1R)-1-hydroxytridecyl]tetrahydrofuran-2-yl]tridecyl]-1-methyl-1H-pyrazole (7l)** The procedure was the same as that used for the preparation of **7d** by use of **S3b** instead of **6d**, giving **7l** (Yield: 93%) as a white waxy solid. M.p. 75.5–76.4 °C;  $[\alpha]^{24}_{\text{D}}$  +10.7 (*c* 0.320 in  $\text{CHCl}_3$ );  $^1\text{H}$  NMR (500 MHz,  $\text{CDCl}_3$ )  $\delta$ : 0.88 (t, 3H, *J* = 6.7 Hz), 1.26–1.72 (m, 46H), 1.98–1.99 (m, 2H), 2.36 (br s, 2H), 2.43 (t, 2H, *J* = 7.6 Hz), 3.40 (q, 2H, *J* = 6.1 Hz), 3.80 (dt, 2H, *J* = 7.9, 6.1 Hz), 3.85 (s, 3H), 7.12 (s, 1H), 7.29 (s, 1H);  $^{13}\text{C}$  NMR (75 MHz,  $\text{CDCl}_3$ )  $\delta$ : 14.1, 22.7, 24.1, 25.6 (2C), 28.7 (2C), 29.2, 29.3, 29.4, 29.57 (4C), 29.61 (4C), 29.65 (2C), 29.7 (2C), 31.0, 31.9, 33.4 (2C), 38.7, 74.0 (2C), 82.6 (2C), 122.1, 128.0, 138.7; IR (KBr)  $\text{cm}^{-1}$ : 3465, 3438; MS (FAB)  $m/z$ : 549  $[M+H]^+$ ; HRMS (FAB)  $m/z$ : calcd for  $\text{C}_{34}\text{H}_{65}\text{N}_2\text{O}_3$ : 549.4995; found: 549.4993  $[M+H]^+$ .

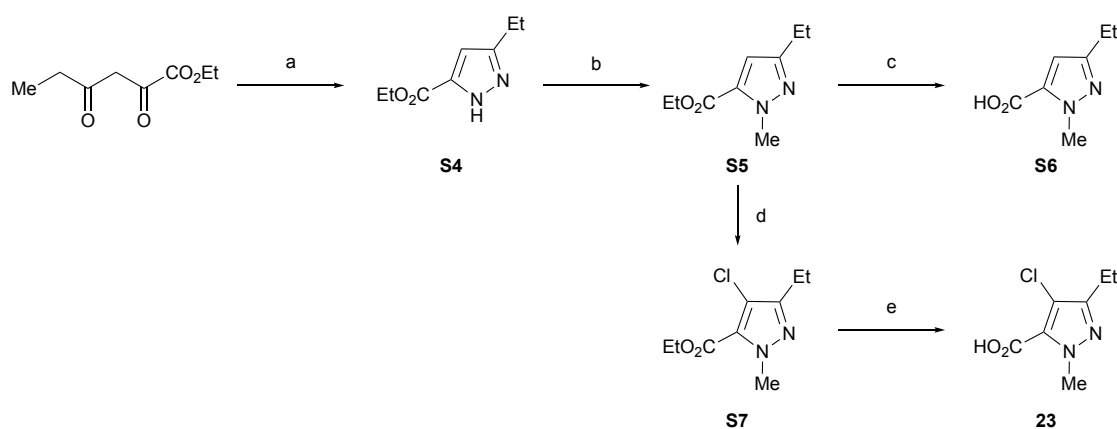

**Scheme S2** Synthesis of substituted pyrazoles **S6** and **23**; Reagents and conditions: (a)  $\text{NH}_2\text{NH}_2 \cdot \text{H}_2\text{O}$ , AcOH, 100 °C, 90%; (b)  $\text{Me}_2\text{SO}_4$ , THF, 65 °C, 57%; (c) 2N NaOH, rt, 85%; (d)  $\text{SO}_2\text{Cl}_2$ ,  $\text{CH}_2\text{Cl}_2$ , rt, quant.; (e) 2N NaOH, rt, 96%.

**Ethyl 3-ethyl-1H-pyrazole-5-carboxylate (S4)** Hydrazine monohydrate (49.0  $\mu$ L, 1.00 mmol) was added to a solution of ethyl 4-oxohexanoate (17.2 mg, 0.100 mmol) in AcOH (1.0 mL) with stirring at rt over 10 min. After stirring for 3 h at reflux, water was added to the reaction mixture and the mixture was extracted with  $\text{CHCl}_3$ . The combined organic layer was washed with saturated  $\text{NaHCO}_3$  prior to drying and solvent evaporation. Purification by column chromatography over silica gel with *n*-hexane/EtOAc (5:1) as eluent yielded **S4** (15.2 mg, 90%) as a colorless oil.  $^1\text{H}$  NMR (500 MHz,  $\text{CDCl}_3$ )  $\delta$ : 1.26 (t, 3H,  $J = 7.3$  Hz), 1.34 (t, 3H,  $J = 7.3$  Hz), 2.73 (q, 2H,  $J = 7.3$  Hz), 4.36 (q, 2H,  $J = 7.3$  Hz), 6.60 (s, 1H);  $^{13}\text{C}$  NMR (100 MHz,  $\text{CDCl}_3$ )  $\delta$ : 13.2, 14.2, 19.4, 60.8, 105.7, 141.4, 149.2, 162.0; IR (NaCl)  $\text{cm}^{-1}$ : 1726; MS (EI)  $m/z$ : 168 (61.8) [ $M$ ] $^+$ , 153 (12.6), 122 (100.0), 107 (15.5), 94 (19.2); HRMS (EI)  $m/z$ : calcd for  $\text{C}_8\text{H}_{12}\text{N}_2\text{O}_2$ : 168.0899; found: 168.0901 [ $M$ ] $^+$ .

**Ethyl 3-ethyl-1-methyl-1H-pyrazole-5-carboxylate (S5)** Dimethyl sulfate (3.37 mL, 34.7 mmol) was added to a solution of **S4** (583 mg, 3.47 mmol) in THF (35 mL) with stirring at rt. After stirring for 3 h at 65  $^\circ\text{C}$ , water was added to the reaction mixture and the mixture was extracted with  $\text{Et}_2\text{O}$ . The combined organic layer was washed with brine prior to drying and solvent evaporation. Purification by column chromatography over silica gel with *n*-hexane/EtOAc (15:1 to 10:1) as eluent yielded **S5** (358 mg, 57%) as a colorless oil.  $^1\text{H}$  NMR (500 MHz,  $\text{CDCl}_3$ )  $\delta$ : 1.24 (t, 3H,  $J = 7.8$  Hz), 1.37 (t, 3H,  $J = 7.3$  Hz), 2.64 (q, 2H,  $J = 7.8$  Hz), 4.11 (s, 3H), 4.33 (q, 2H,  $J = 7.3$  Hz), 6.63 (s, 1H);  $^{13}\text{C}$  NMR (100 MHz,  $\text{CDCl}_3$ )  $\delta$ : 13.8, 14.2, 21.2, 39.1, 60.8, 108.9, 132.9, 153.0, 160.0; IR (NaCl)  $\text{cm}^{-1}$ : 1724; MS (EI)  $m/z$ : 182 (100) [ $M$ ] $^+$ , 167 (40.9), 139 (36.6), 109 (15.8); HRMS (EI)  $m/z$ : calcd for  $\text{C}_9\text{H}_{14}\text{N}_2\text{O}_2$ : 182.1055; found: 182.1072 [ $M$ ] $^+$ .

**3-Ethyl-1-methyl-1H-pyrazole-5-carboxylic acid (S6)** A solution of **S5** (93.2 mg, 0.511 mmol) in 2N NaOH (5.1 mL) was stirred for 1 h at 65 $^\circ\text{C}$ . 3N HCl was added to the reaction mixture and the mixture was extracted with  $\text{Et}_2\text{O}$ . The combined organic layer was washed with brine prior to drying and solvent evaporation. The residual solid was recrystallized from MeOH to give **S6** (66.9 mg, 85%) as colorless needles. M.p. 152.0–153.0  $^\circ\text{C}$  (MeOH):  $^1\text{H}$  NMR (500 MHz,  $\text{CDCl}_3$ )  $\delta$ : 1.26 (t, 3H,  $J = 7.3$  Hz), 2.69 (q, 2H,  $J = 7.3$  Hz), 4.17 (s, 3H), 6.77 (s, 1H), 9.76 (br s, 1H);  $^{13}\text{C}$  NMR (125 MHz,  $\text{CDCl}_3$ )  $\delta$ : 13.7, 20.9, 39.1, 110.2, 132.6, 153.3, 163.5; IR (NaCl)  $\text{cm}^{-1}$ : 1705; MS (EI)  $m/z$ : 154 (97.8) [ $M$ ] $^+$ , 139 (100), 109 (10.0); HRMS (EI)  $m/z$ : calcd for  $\text{C}_7\text{H}_{10}\text{N}_2\text{O}_2$ : 154.0742; found: 154.0756 [ $M$ ] $^+$ .

**Ethyl 4-chloro-3-ethyl-1-methyl-1H-pyrazole-5-carboxylate (S7)** Sulfuryl chloride (25.0  $\mu$ L, 0.311 mmol) was added to a solution of **S5** (19.2 mg, 0.105 mmol) in  $\text{CH}_2\text{Cl}_2$  (1.0 mL) with stirring at rt over 5 min. After stirring for 30 min at the same temperature, water was added to the reaction mixture and the mixture was extracted with  $\text{Et}_2\text{O}$ . The combined organic layer was washed with brine prior to drying and solvent evaporation. Purification by column chromatography over silica gel with *n*-hexane/EtOAc (10:1) as eluent yielded **S7** (22.8 mg, quant.) as a colorless oil.  $^1\text{H}$  NMR (400 MHz,  $\text{CDCl}_3$ )  $\delta$ : 1.24 (t, 3H,  $J = 7.8$  Hz), 1.41 (t, 3H,  $J = 7.3$  Hz), 2.64 (q, 2H,  $J = 7.8$  Hz), 4.09 (s, 3H), 4.39 (q, 2H,  $J = 7.3$  Hz);  $^{13}\text{C}$  NMR (125 MHz,  $\text{CDCl}_3$ )  $\delta$ : 12.8, 14.1, 19.2, 40.5, 61.3, 113.1, 129.0, 150.4, 159.2; IR (NaCl)  $\text{cm}^{-1}$ : 1719; MS (EI)  $m/z$ : 218 (30.3)

$[M+2]^+$ , 216 (100.0)  $[M]^+$ , 201 (40.9), 187 (37.5), 173 (49.8); HRMS (EI)  $m/z$ : calcd for  $C_9H_{13}ClN_2O_2$ : 216.0666; found: 216.0687  $[M]^+$ .

**4-Chloro-3-ethyl-1-methyl-1H-pyrazole-5-carboxylic acid (23)** The procedure was the same as that used for the preparation of **S6** by use of **S7** instead of **S5**, giving **23** (Yield: 96%) as colorless needles. M.p. 162.5–163.4 °C (MeOH):  $^1H$  NMR (500 MHz,  $CDCl_3$ )  $\delta$ : 1.26 (t, 3H,  $J = 7.3$  Hz), 2.68 (q, 2H,  $J = 7.3$  Hz), 4.14 (s, 3H);  $^{13}C$  NMR (125 MHz,  $CDCl_3$ )  $\delta$ : 12.7, 19.1, 40.9, 114.8, 128.2, 150.7, 162.9; IR (NaCl)  $cm^{-1}$ : 1707; MS (EI)  $m/z$ : 190 (24.1)  $[M+2]^+$ , 188 (74.9)  $[M]^+$ , 173 (100.0); HRMS (EI)  $m/z$ : calcd for  $C_7H_9ClN_2O_2$ : 188.0353; found: 188.0359  $[M]^+$ .

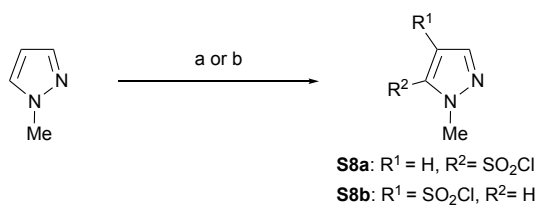

**Scheme S3** Synthesis of pyrazole-sulfonyl chloride **S8a-S8b**; Reagents and conditions: (a)  $t$ -BuLi,  $-78$  °C then  $SO_2Cl_2$ ,  $-78$  °C, 24%; (b)  $ClSO_3H$ , rt to  $120$  °C, 25%.

**1-Methyl-1H-pyrazole-5-sulfonyl chloride (S8a)**  $t$ -BuLi (1.6 M in  $n$ -pentane, 3.94 mL, 6.31 mmol) was added to a solution of 1-methyl-1H-pyrazole (246 mg, 3.00 mmol) in THF (10 mL) with stirring at  $-78$  °C over 10 min. After stirring for 1 h at the same temperature, sulfuryl chloride (0.362 mL, 4.50 mmol) was added to the reaction mixture at the same temperature. After stirring for 1.5 h at the same temperature, water was added to the reaction mixture at  $0$  °C and the mixture was extracted with  $Et_2O$ . The combined organic layer was washed with brine prior to drying and solvent evaporation. Purification by flash column chromatography over silica gel with  $n$ -hexane/ $EtOAc$  (20:1 to 10:1) as eluent yielded **S8a** (127 mg, 24%) as a colorless oil.  $^1H$  NMR (500 MHz,  $CDCl_3$ )  $\delta$ : 4.23 (s, 3H), 7.02 (d, 1H,  $J = 1.8$  Hz), 7.57 (d, 1H,  $J = 1.8$  Hz);  $^{13}C$  NMR (125 MHz,  $CDCl_3$ )  $\delta$ : 39.0, 112.1, 137.9, 141.1; IR (NaCl)  $cm^{-1}$ : 1386, 1200; MS (EI)  $m/z$ : 182 (15.7)  $[M+2]^+$ , 180 (44.8)  $[M]^+$ , 145 (100.0); HRMS (EI)  $m/z$ : Calcd for  $C_4H_5ClN_2O_2S$ : 179.9760; Found: 179.9787  $[M]^+$ .

**1-Methyl-1H-pyrazole-4-sulfonyl chloride (S8b)** A mixture of 1-methyl-1H-pyrazole (246 mg, 3.00 mmol) and chlorosulfuric acid (1.60 mL, 24.0 mmol) was stirred at  $100$  °C for 3 h. After cooling to rt, the mixture was poured into ice-water. The residual solid was collected and washed with water and  $CH_3CN$  to give **S8b** (135 mg, 25%) as a white solid.  $^1H$  NMR (500 MHz,  $CDCl_3$ )  $\delta$ : 4.01 (s, 3H), 7.97 (s, 1H), 8.03 (s, 1H);  $^{13}C$  NMR (125 MHz,  $CDCl_3$ )  $\delta$ : 40.0, 126.6, 132.5, 138.5; IR (NaCl)  $cm^{-1}$ : 1395, 1370; MS (EI)  $m/z$ : 182 (4.3)  $[M+2]^+$ , 180 (14.5)  $[M]^+$ , 145 (100.0); HRMS (EI)  $m/z$ : Calcd for  $C_4H_5ClN_2O_2S$ : 179.9760; Found: 179.9752  $[M]^+$ .

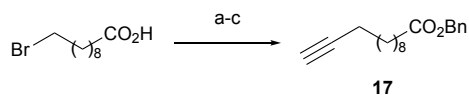

**Scheme S4** Synthesis of benzyl ester **17**; Reagents and conditions: (a) NaI, acetone, reflux; (b) lithium acetylide ethylenediamine complex, HMPA 0 °C ; (c) BnBr, CsCO<sub>3</sub>, DMF, rt, 51% over 3 steps.

**Benzyl dodec-11-ynoate (17)** A suspension of 10-bromododecanoic acid (2.00 g, 7.96 mmol) and sodium iodide (2.38 g, 15.9 mmol) in acetone (20 mL) was stirred for 18 h at reflux. After cooling, the precipitate was filtered off and the filtrate was concentrated under reduced pressure. Water was added to the residual mixture and the mixture was extracted with Et<sub>2</sub>O. The combined organic layers were washed with saturated Na<sub>2</sub>S<sub>2</sub>O<sub>3</sub> prior to drying and solvent evaporation. The residual solid was recrystallized from Et<sub>2</sub>O and *n*-hexane to give a crude of 10-iodododecanoic acid as a white solid. A solution of lithium acetylide ethylenediamine complex (1.38 g, 15.0 mmol) in hexamethylphosphoric triamide (HMPA, 18 mL) was stirred for 40 min at rt. A solution of crude of 10-iodododecanoic acid in HMPA (2 mL) was added to the mixture at 0 °C over 30 min. After stirred for 70 min at the same temperature, water and 3N HCl were added to the reaction mixture and the mixture was extracted with Et<sub>2</sub>O. The combined organic layers were washed with brine prior to drying and solvent evaporation. The mixture was filtered through a short pad of silica gel with *n*-hexane/EtOAc (8:1 to 3:1) as eluent to give a crude of dodec-11-ynoic acid as a white solid. Cesium carbonate (740 mg, 2.27 mmol) was added to a suspension of a crude of dodec-11-ynoic acid in DMF (18 mL) with stirring at rt. Benzyl bromide (0.540 mL, 4.54 mmol) was added to the mixture at the same temperature. After stirring for 3 h at the same temperature, water was added to the reaction mixture and the mixture was extracted with Et<sub>2</sub>O. The combined organic layers were dried prior to solvent evaporation. Purification by column chromatography over silica gel with *n*-hexane/EtOAc (50:1 to 30:1) as eluent yielded **17** (1.17 g, 51% over 3 steps) as a colorless oil. <sup>1</sup>H NMR (500 MHz, CDCl<sub>3</sub>) δ: 1.26–1.42 (m, 10H), 1.47–1.54 (m, 2H), 1.61–1.66 (m, 2H), 1.93 (t, 1H, *J* = 2.4 Hz), 2.16 (td, 2H, *J* = 7.3, 2.4 Hz), 2.34 (t, 2H, *J* = 7.3 Hz), 5.11 (s, 2H), 7.29–7.37 (m, 5H); <sup>13</sup>C NMR (125 MHz, CDCl<sub>3</sub>) δ: 18.3, 24.8, 28.4, 28.6, 28.9, 29.0, 29.1, 29.2, 34.2, 66.0, 68.0, 84.6, 128.06, 128.07 (2C), 128.4 (2C), 136.1, 173.5; IR (NaCl) cm<sup>-1</sup>: 3306, 1736; MS (EI) *m/z*: 286 (2.6) [*M*]<sup>+</sup>, 195 (2.0), 180 (3.9), 108 (33.2), 91 (100); HRMS (EI) *m/z*: Calcd for C<sub>19</sub>H<sub>26</sub>O<sub>2</sub>: 286.1933; Found: 286.1936 [*M*+H]<sup>+</sup>.

**Table S1.** Logarithm of the 1/GI<sub>50</sub> values of compounds against 39 human cancer cell lines

| cell line  | solamin | 1    | 7a   | 7e   | 7g   | 7h   | 7i   | 7j   | 7k   | 7b   | 7c   | 23   | 7l   | 7d   | 7f   |
|------------|---------|------|------|------|------|------|------|------|------|------|------|------|------|------|------|
| HBC-4      | 4.00    | 4.00 | 4.00 | 5.24 | 5.00 | 5.74 | 4.00 | 4.29 | 4.00 | 4.43 | 4.80 | 4.00 | 4.00 | 4.00 | 4.00 |
| BSY-1      | 4.00    | 4.49 | 8.00 | 5.70 | 6.30 | 6.47 | 4.02 | 6.09 | 4.47 | 5.80 | 8.00 | 4.00 | 4.00 | 4.00 | 4.43 |
| HBC-5      | 4.00    | 4.16 | 4.77 | 5.43 | 5.51 | 5.68 | 4.00 | 4.59 | 4.00 | 4.72 | 4.85 | 4.00 | 4.00 | 4.00 | 4.43 |
| MCF-7      | 4.15    | 4.57 | 5.49 | 5.62 | 5.30 | 5.77 | 4.00 | 4.64 | 4.66 | 5.68 | 5.42 | 4.18 | 4.00 | 4.77 | 4.96 |
| MDA-MB-231 | 4.00    | 4.49 | 5.07 | 5.11 | 5.05 | 5.66 | 4.00 | 4.00 | 4.21 | 4.41 | 4.82 | 4.00 | 4.00 | 4.00 | 4.00 |
| U251       | 4.00    | 4.00 | 4.00 | 5.29 | 5.00 | 5.82 | 4.00 | 4.16 | 4.00 | 4.57 | 5.26 | 4.00 | 4.00 | 4.00 | 4.00 |
| SF-268     | 4.00    | 4.00 | 4.00 | 4.89 | 4.82 | 5.44 | 4.00 | 4.00 | 4.00 | 4.15 | 5.06 | 4.00 | 4.00 | 4.00 | 4.00 |
| SF-295     | 4.40    | 4.62 | 5.00 | 6.15 | 5.70 | 5.92 | 4.24 | 4.51 | 4.54 | 5.44 | 4.96 | 4.04 | 4.62 | 4.62 | 5.85 |
| SF-539     | 4.00    | 4.43 | 5.43 | 4.89 | 4.92 | 5.80 | 4.00 | 4.00 | 4.00 | 4.60 | 5.57 | 4.00 | 4.43 | 4.00 | 4.00 |
| SNB-75     | 4.00    | 4.00 | 4.30 | 4.92 | 4.80 | 5.70 | 4.00 | 4.00 | 4.00 | 4.35 | 4.48 | 4.33 | 4.64 | 4.00 | 4.00 |
| SNB-78     | 4.00    | 4.00 | 4.00 | 5.96 | 4.92 | 5.68 | 4.00 | 4.35 | 4.00 | 4.28 | 4.52 | 4.00 | 4.09 | 4.00 | 4.00 |
| HCC2998    | 4.00    | 4.10 | 4.00 | 5.35 | 4.92 | 5.74 | 4.00 | 4.33 | 4.00 | 4.24 | 4.59 | 4.00 | 4.00 | 4.00 | 4.00 |
| KM-12      | 4.00    | 4.15 | 4.00 | 5.17 | 5.38 | 5.85 | 4.00 | 4.70 | 4.00 | 4.43 | 4.92 | 4.00 | 4.00 | 4.00 | 4.00 |
| HT-29      | 4.00    | 4.12 | 4.00 | 5.47 | 5.09 | 5.52 | 4.00 | 4.49 | 4.06 | 4.27 | 4.77 | 4.00 | 4.00 | 4.00 | 4.00 |
| HCT-15     | 4.00    | 4.00 | 4.00 | 5.24 | 5.00 | 5.70 | 4.00 | 4.32 | 4.00 | 4.17 | 4.24 | 4.00 | 4.00 | 4.00 | 4.00 |
| HCT-116    | 4.00    | 5.04 | 8.00 | 5.77 | 6.10 | 5.96 | 4.19 | 5.40 | 6.07 | 8.00 | 7.74 | 4.00 | 4.15 | 5.89 | 5.33 |
| NCI-H23    | 4.14    | 6.04 | 7.28 | 6.60 | 6.62 | 6.19 | 4.57 | 4.96 | 5.42 | 5.89 | 5.85 | 4.00 | 4.89 | 4.85 | 4.89 |
| NCI-H226   | 4.00    | 4.28 | 4.39 | 5.35 | 5.01 | 5.48 | 4.12 | 4.55 | 4.68 | 4.66 | 4.74 | 4.14 | 4.25 | 4.36 | 4.46 |
| NCI-H522   | 4.24    | 5.42 | 5.85 | 6.23 | 5.64 | 5.89 | 4.54 | 5.20 | 5.64 | 5.72 | 5.43 | 4.27 | 4.92 | 4.62 | 4.92 |
| NCI-H460   | 4.00    | 4.00 | 5.09 | 5.74 | 5.26 | 5.77 | 4.00 | 4.46 | 4.00 | 4.74 | 5.68 | 4.00 | 4.00 | 4.00 | 4.00 |
| A549       | 4.00    | 4.51 | 4.89 | 5.27 | 5.07 | 5.06 | 4.00 | 4.25 | 4.05 | 5.00 | 5.24 | 4.00 | 4.00 | 4.00 | 4.00 |
| DMS273     | 4.00    | 4.31 | 5.24 | 5.64 | 5.48 | 5.80 | 4.00 | 4.42 | 4.30 | 5.08 | 5.54 | 4.00 | 4.00 | 4.00 | 4.10 |
| DMS114     | 5.37    | 6.26 | 8.00 | 7.07 | 7.46 | 6.89 | 5.48 | 6.39 | 6.70 | 8.00 | 8.00 | 4.00 | 5.68 | 7.08 | 7.22 |
| LOX-IMVI   | 4.54    | 4.00 | 8.00 | 5.82 | 5.85 | 5.92 | 4.00 | 4.89 | 4.68 | 5.19 | 5.52 | 4.00 | 5.02 | 4.00 | 4.00 |
| OVCAR-3    | 4.00    | 4.00 | 4.11 | 5.28 | 5.00 | 5.82 | 4.00 | 4.00 | 4.00 | 4.85 | 5.33 | 4.00 | 4.00 | 4.00 | 4.00 |
| OVCAR-4    | 4.00    | 4.43 | 4.64 | 5.23 | 5.00 | 5.80 | 4.00 | 4.00 | 4.00 | 4.66 | 5.55 | 4.00 | 4.00 | 4.00 | 4.01 |
| OVCAR-5    | 4.00    | 4.00 | 4.00 | 5.41 | 4.85 | 5.51 | 4.00 | 4.00 | 4.00 | 4.00 | 4.34 | 4.00 | 4.00 | 4.00 | 4.00 |
| OVCAR-8    | 4.00    | 4.00 | 4.51 | 5.29 | 5.22 | 5.80 | 4.00 | 4.00 | 4.00 | 4.70 | 5.36 | 4.00 | 4.00 | 4.00 | 4.00 |
| SK-OV-3    | 4.00    | 4.11 | 4.00 | 5.04 | 4.80 | 5.68 | 4.00 | 4.00 | 4.00 | 4.28 | 4.46 | 4.00 | 4.00 | 4.00 | 4.00 |
| RXF-631L   | 4.00    | 4.00 | 4.00 | 5.05 | 4.96 | 5.62 | 4.00 | 4.00 | 4.00 | 4.32 | 5.46 | 4.00 | 4.00 | 4.00 | 4.00 |
| ACHN       | 4.00    | 4.06 | 4.62 | 5.41 | 4.96 | 5.51 | 4.00 | 4.24 | 4.00 | 4.77 | 5.21 | 4.00 | 4.00 | 4.00 | 4.00 |
| St-4       | 4.00    | 4.19 | 4.74 | 5.22 | 5.17 | 5.74 | 4.00 | 4.52 | 4.02 | 4.68 | 4.82 | 4.00 | 4.00 | 4.00 | 4.00 |
| MKN1       | 4.00    | 4.00 | 4.36 | 5.02 | 5.26 | 5.85 | 4.00 | 4.36 | 4.00 | 4.96 | 5.16 | 4.00 | 4.00 | 4.00 | 4.00 |
| MKN-B      | 4.89    | 5.21 | 8.00 | 7.01 | 7.29 | 6.51 | 4.68 | 6.21 | 5.21 | 7.36 | 6.02 | 4.00 | 5.27 | 5.44 | 7.02 |
| MKN-A      | 4.85    | 5.36 | 8.00 | 6.80 | 6.52 | 6.30 | 4.74 | 5.60 | 4.00 | 4.85 | 4.00 | 4.00 | 4.72 | 8.00 | 6.51 |
| MKN45      | 4.00    | 4.00 | 5.13 | 5.00 | 4.96 | 5.74 | 4.00 | 4.00 | 6.10 | 4.55 | 4.00 | 4.00 | 4.00 | 4.00 | 4.00 |
| MKN74      | 4.00    | 4.64 | 5.41 | 5.89 | 5.77 | 5.89 | 4.00 | 4.51 | 4.46 | 4.77 | 4.00 | 4.00 | 4.00 | 7.59 | 5.01 |
| DU-145     | 4.00    | 4.00 | 4.00 | 4.77 | 4.89 | 5.36 | 4.00 | 4.00 | 4.00 | 4.00 | 4.92 | 4.00 | 4.00 | 4.00 | 4.00 |
| PC-3       | 4.00    | 4.00 | 4.74 | 5.26 | 5.66 | 5.64 | 4.00 | 4.55 | 4.49 | 4.92 | 4.96 | 4.00 | 4.00 | 4.00 | 4.00 |



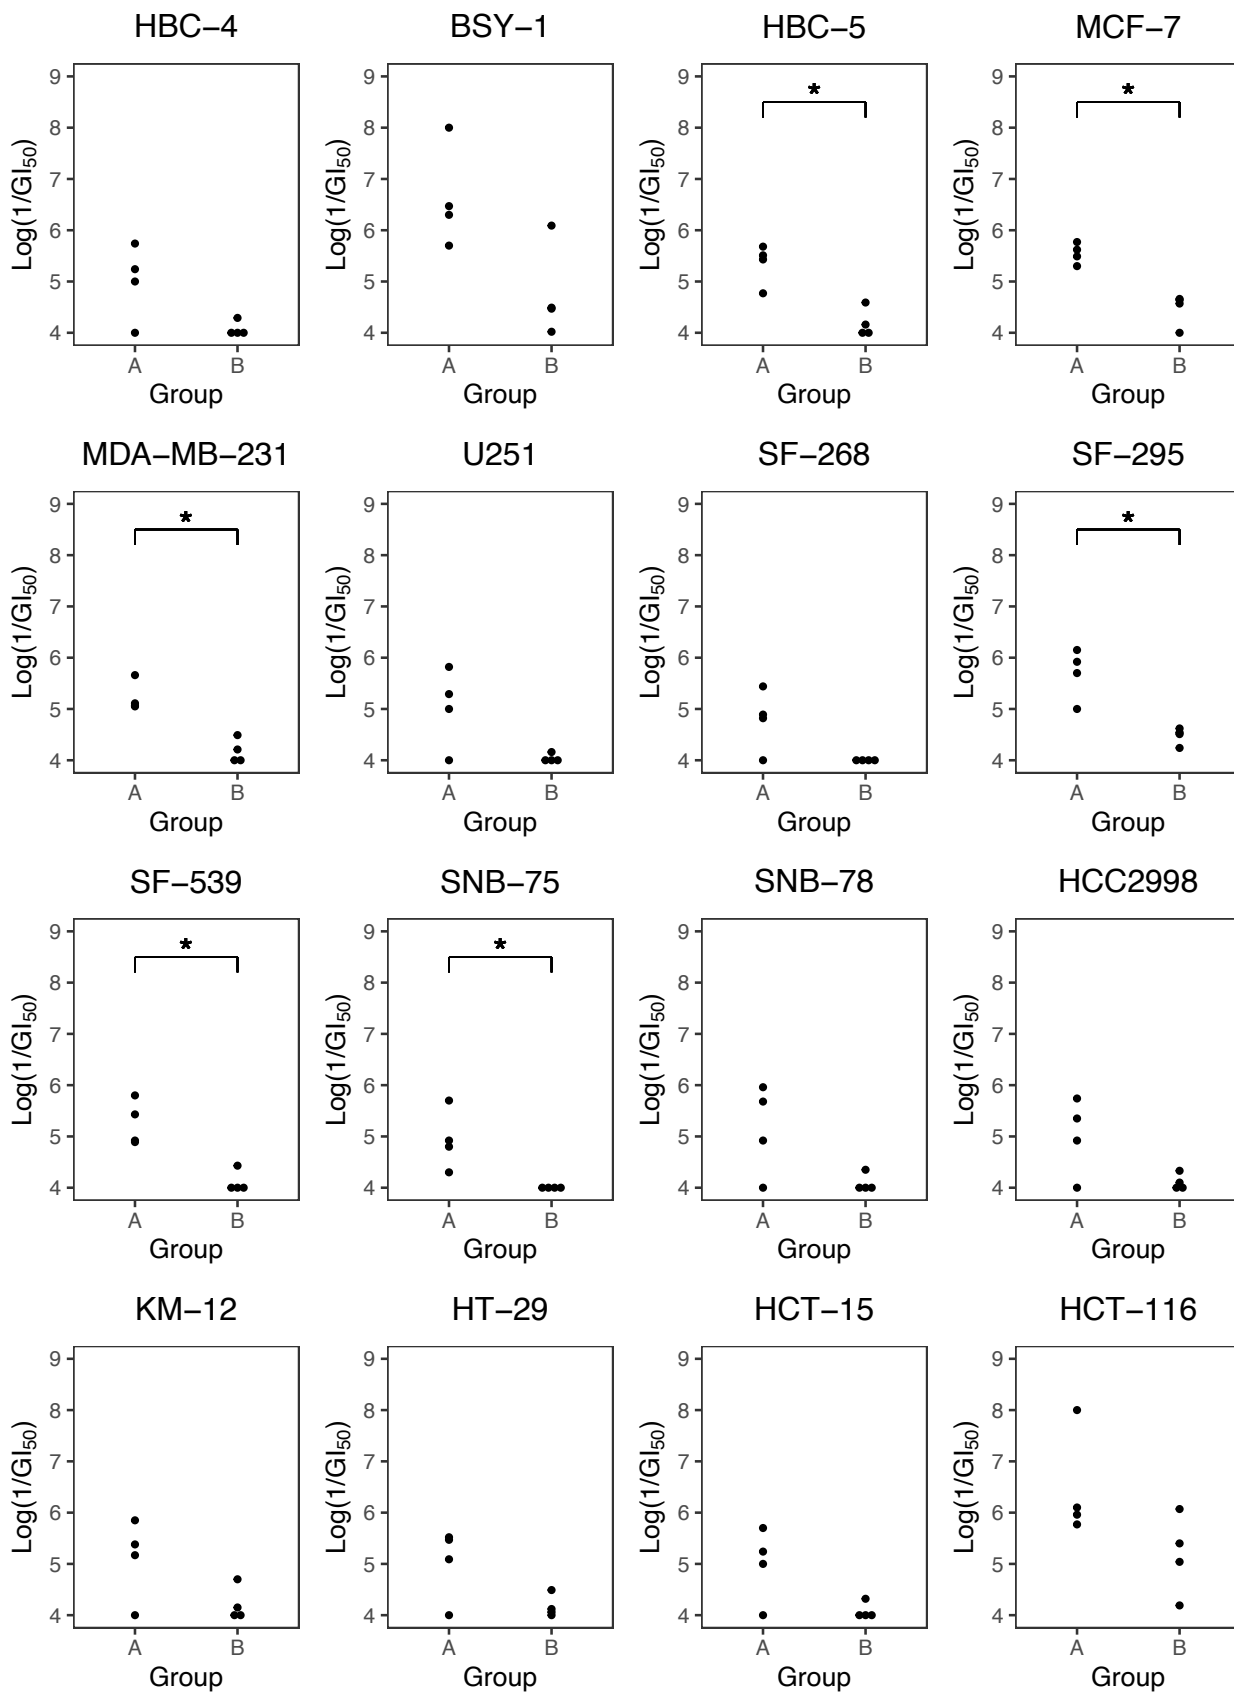

**Fig. S1A.** Comparison of growth-inhibitory activities of analogs **1**, **7a**, **7e**, and **7g-7k**. Each plot shows distribution of logarithm of  $1/\text{GI}_{50}$  against each human cancer cell line among the group A (**7a**, **7e**, **7g** and **7h**) and B (**1** and **7i-7k**).  $P$  values were determined by the Mann-Whitney U test (\* $p < 0.05$ ).

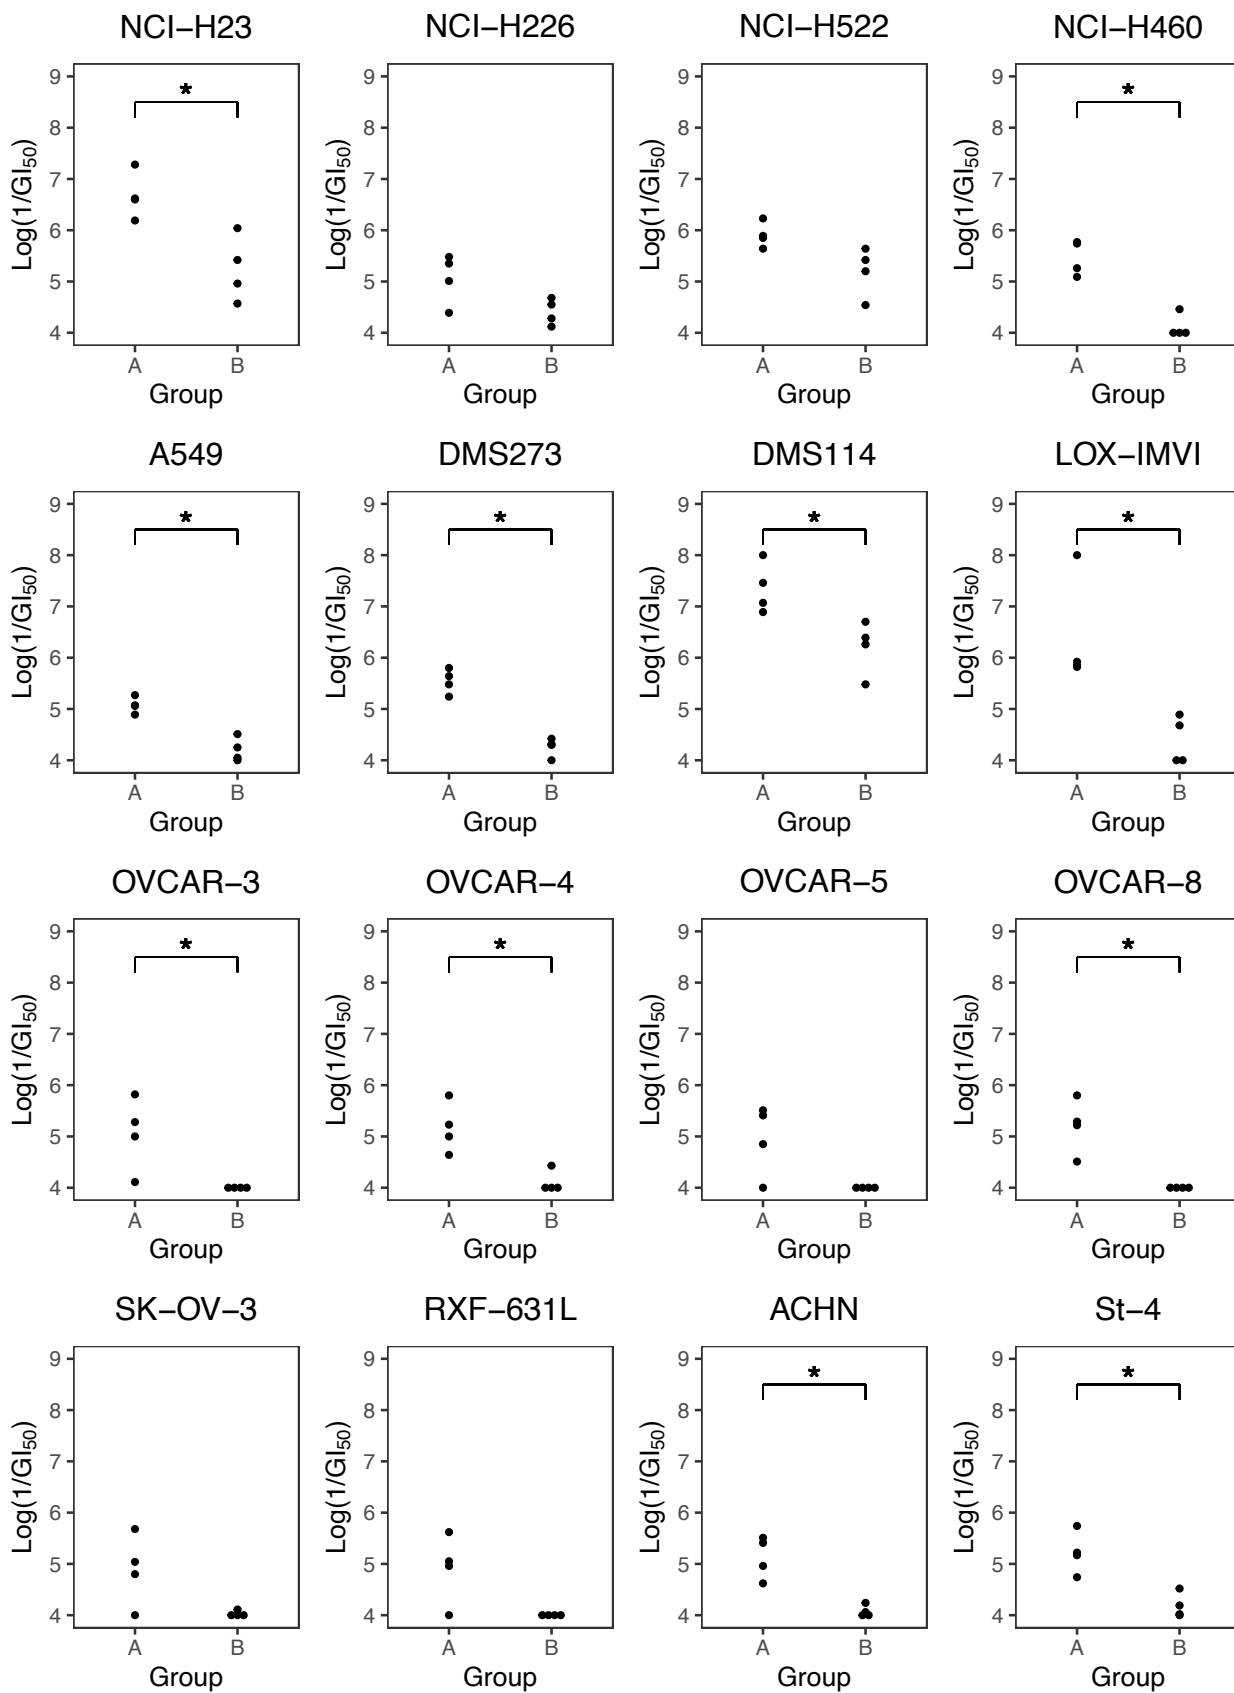

**Fig. S1B.** Comparison of growth-inhibitory activities of analogs **1**, **7a**, **7e**, and **7g-7k**. Each plot shows distribution of logarithm of  $1/GI_{50}$  against each human cancer cell line among the group A (**7a**, **7e**, **7g** and **7h**) and B (**1** and **7i-7k**).  $P$  values were determined by the Mann-Whitney U test (\* $p < 0.05$ ).

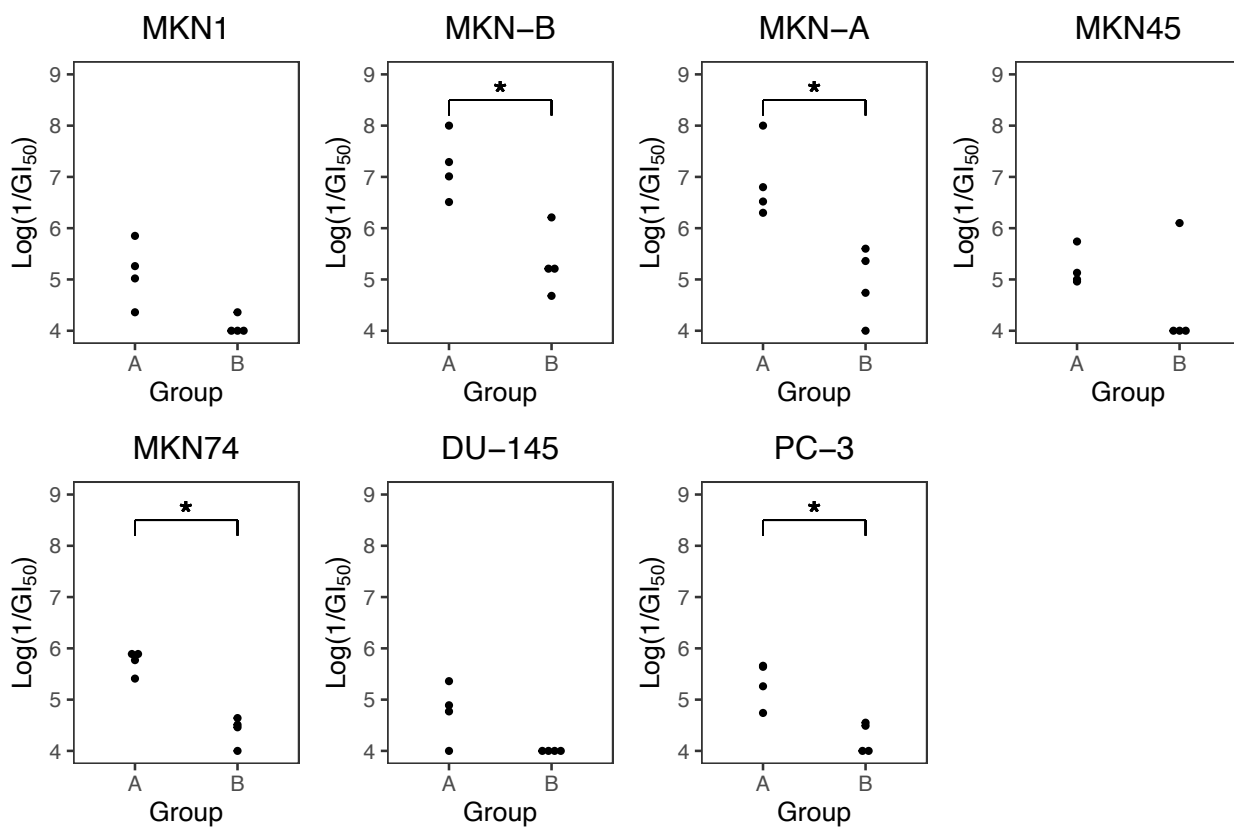

**Fig. S1C.** Comparison of growth-inhibitory activities of analogs **1**, **7a**, **7e**, and **7g-7k**. Each plot shows distribution of logarithm of  $1/\text{GI}_{50}$  against each human cancer cell line among the group A (**7a**, **7e**, **7g** and **7h**) and B (**1** and **7i-7k**).  $P$  values were determined by the Mann–Whitney U test ( $*p < 0.05$ ).

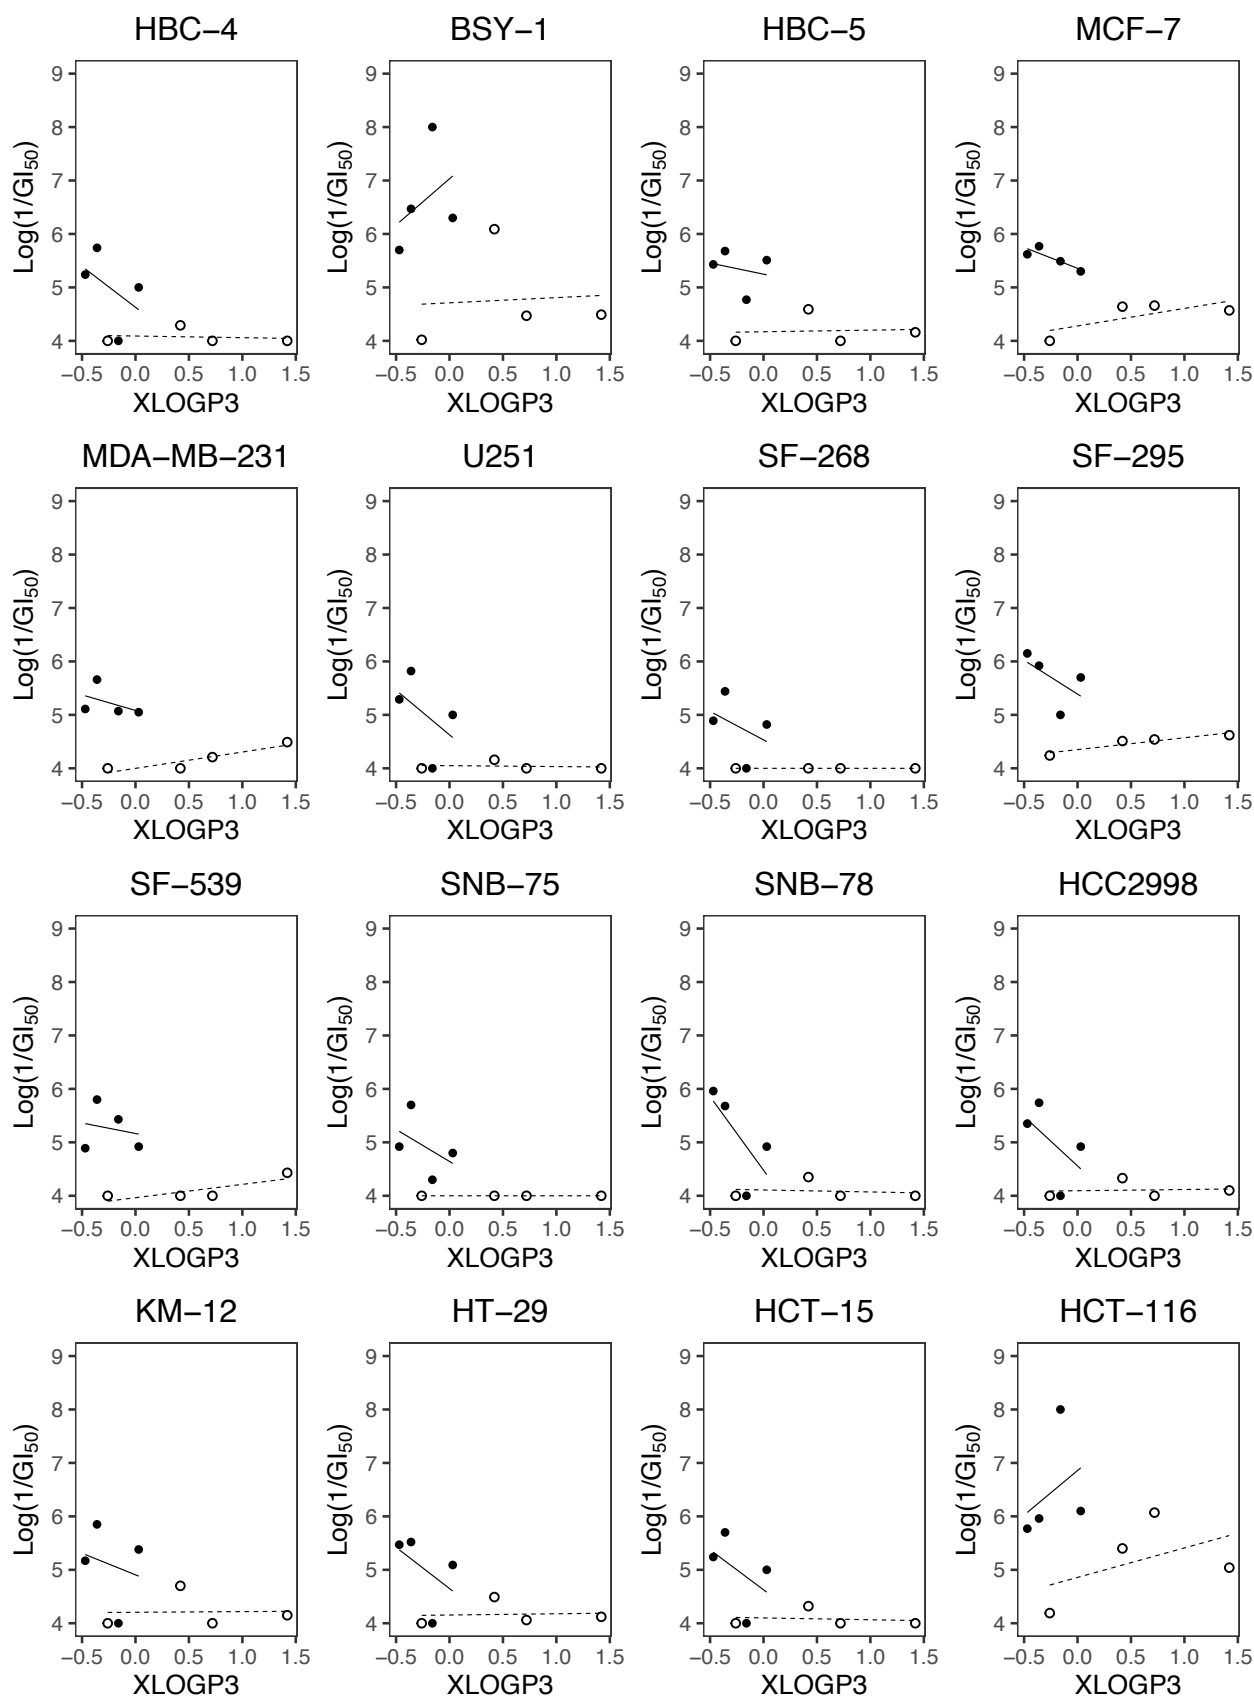

**Fig. S2A.** Correlation between lipophilicity (XLOGP3) of the partial structure of our analogs and logarithm of  $1/\text{GI}_{50}$  against each cancer cell line. Solid circles represent compounds of group A (**7a**, **7e**, **7g** and **7h**), and open circles represent compounds of group B (**1** and **7i-7k**). Trend lines represent the expected values predicted by the QSAR model.

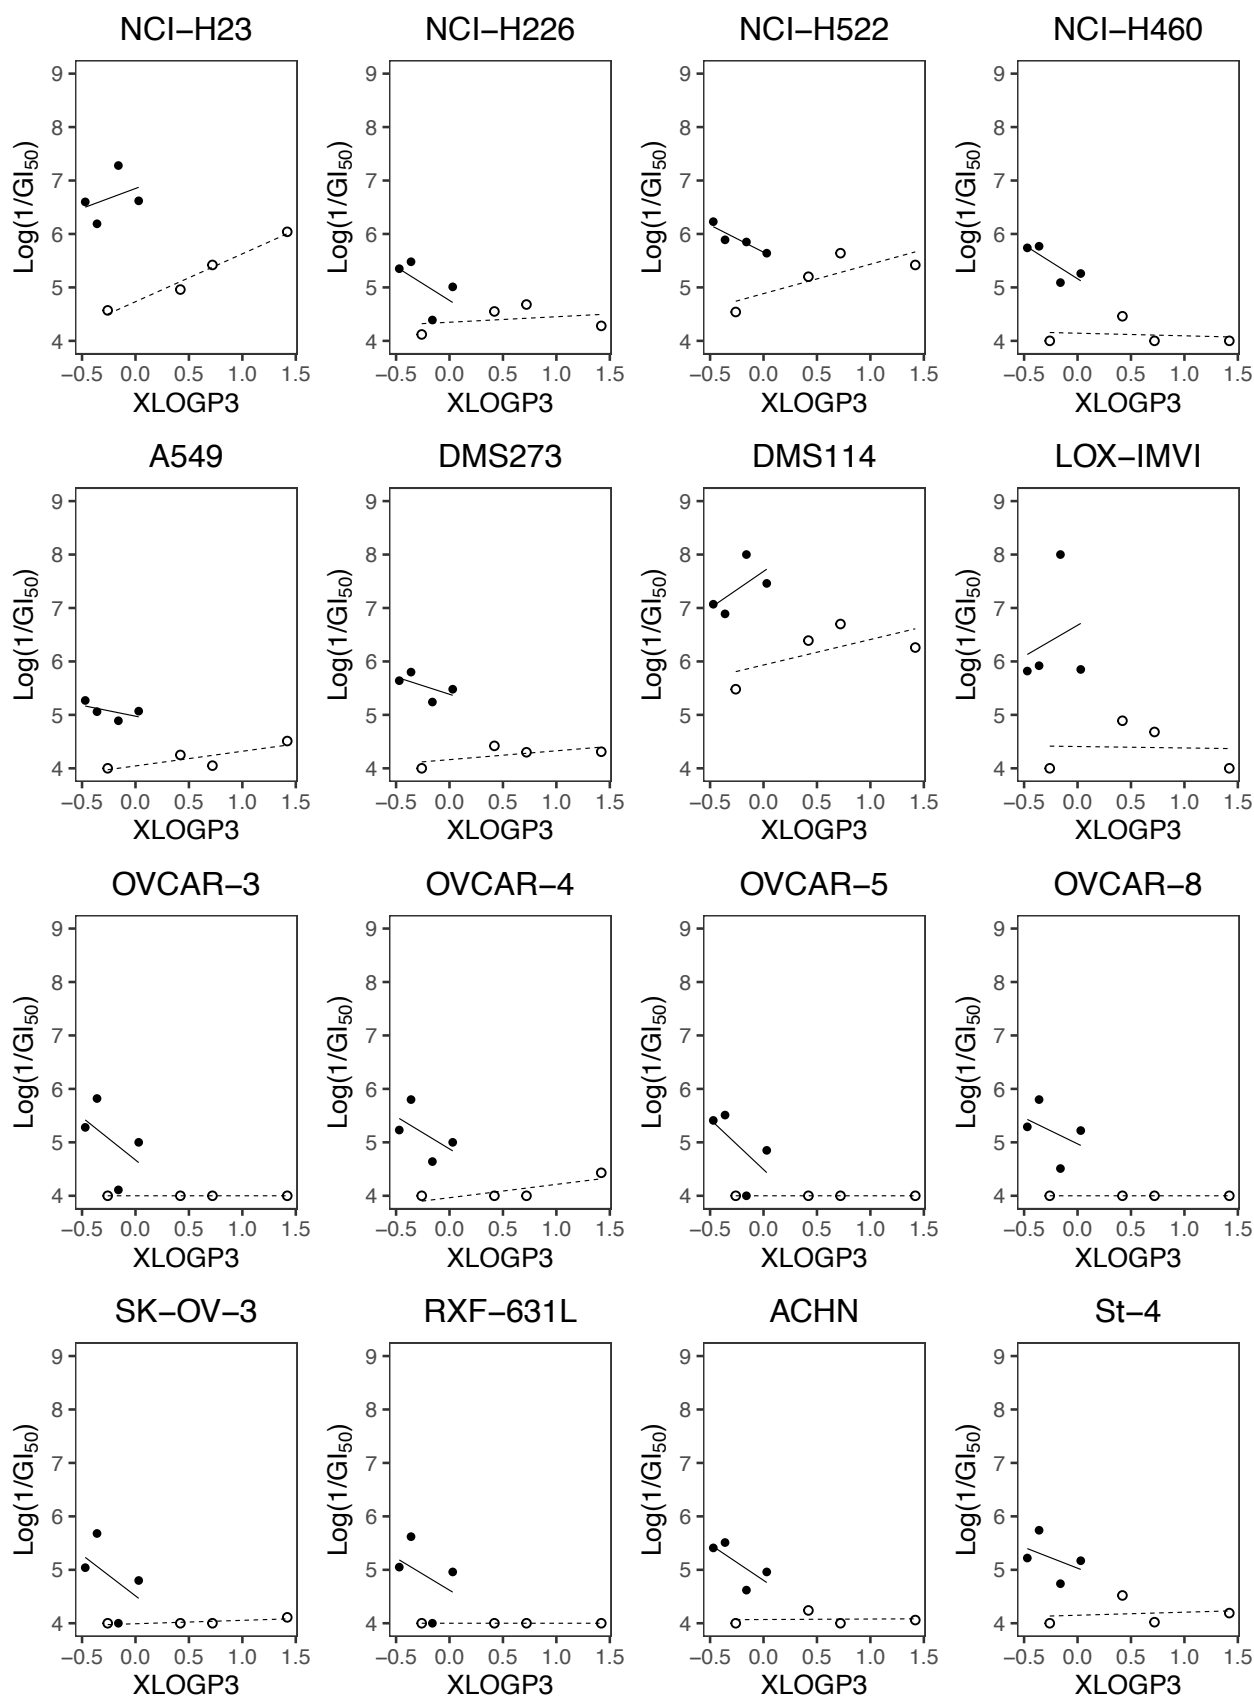

**Fig. S2B.** Correlation between lipophilicity (XLOGP3) of the partial structure of our analogs and logarithm of  $1/\text{GI}_{50}$  against each cancer cell line. Solid circles represent compounds of group A (**7a**, **7e**, **7g** and **7h**), and open circles represent compounds of group B (**1** and **7i-7k**). Trend lines represent the expected values predicted by the QSAR model.

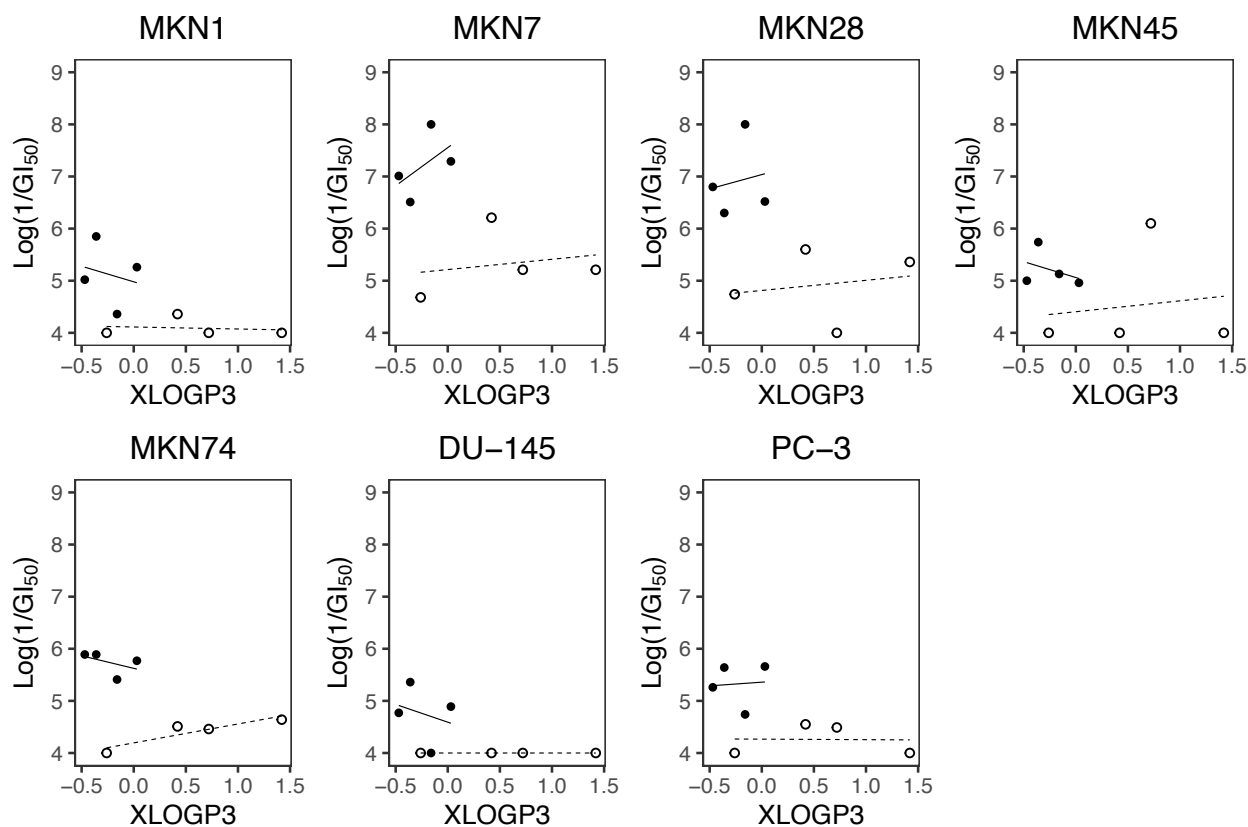

**Fig. S2C.** Correlation between lipophilicity (XLOGP3) of the partial structure of our analogs and logarithm of  $1/GI_{50}$  against each cancer cell line. Solid circles represent compounds of group A (**7a**, **7e**, **7g** and **7h**), and open circles represent compounds of group B (**1** and **7i-7k**). Trend lines represent the expected values predicted by the QSAR model.

**Table S2A.** QSAR models of the relationships between the  $\text{Log}(1/\text{GI}_{50})$  and XLOP3 of partial structure of analogs in group A (**7a**, **7e**, **7g**, and **7h**).  $n$  is the number of compounds,  $r$  is the correlation coefficient,  $s$  is the standard deviation, and the figures in parentheses are the 95% confidence intervals.

$$\text{Log}(1/\text{GI}_{50}) = a \text{XLOGP3} + b$$

| cell line  | $a$             | $b$           | $n$ | $r^2$ | $s$   |
|------------|-----------------|---------------|-----|-------|-------|
| HBC-4      | -1.528(±8.930)  | 4.628(±2.741) | 4   | 0.213 | 0.795 |
| BSY-1      | 1.730(±12.405)  | 7.033(±3.808) | 4   | 0.153 | 1.104 |
| HBC-5      | -0.417(±5.341)  | 5.247(±1.640) | 4   | 0.054 | 0.475 |
| MCF-7      | -0.783(±1.363)  | 5.357(±0.418) | 4   | 0.754 | 0.121 |
| MDA-MB-231 | -0.583(±3.618)  | 5.083(±1.111) | 4   | 0.194 | 0.322 |
| U251       | -1.672(±9.211)  | 4.626(±2.828) | 4   | 0.234 | 0.820 |
| SF-268     | -1.065(±7.502)  | 4.532(±2.303) | 4   | 0.157 | 0.668 |
| SF-295     | -1.268(±5.646)  | 5.388(±1.733) | 4   | 0.318 | 0.502 |
| SF-539     | -0.395(±5.894)  | 5.165(±1.809) | 4   | 0.040 | 0.524 |
| SNB-75     | -1.198(±7.091)  | 4.643(±2.177) | 4   | 0.209 | 0.631 |
| SNB-78     | -2.756(±8.700)  | 4.479(±2.671) | 4   | 0.482 | 0.774 |
| HCC2998    | -1.848(±8.617)  | 4.559(±2.645) | 4   | 0.299 | 0.767 |
| KM-12      | -0.808(±10.542) | 4.906(±3.236) | 4   | 0.052 | 0.938 |
| HT-29      | -1.543(±8.517)  | 4.650(±2.615) | 4   | 0.233 | 0.758 |
| HCT-15     | -1.495(±8.773)  | 4.626(±2.693) | 4   | 0.212 | 0.781 |
| HCT-116    | 1.669(±13.341)  | 6.858(±4.096) | 4   | 0.127 | 1.187 |
| NCI-H23    | 0.744(±5.778)   | 6.851(±1.774) | 4   | 0.133 | 0.514 |
| NCI-H226   | -1.256(±5.508)  | 4.756(±1.691) | 4   | 0.325 | 0.490 |
| NCI-H522   | -1.016(±1.326)  | 5.659(±0.407) | 4   | 0.845 | 0.118 |
| NCI-H460   | -1.263(±2.722)  | 5.162(±0.836) | 4   | 0.666 | 0.242 |
| A549       | -0.404(±1.751)  | 4.976(±0.538) | 4   | 0.330 | 0.156 |
| DMS273     | -0.644(±2.640)  | 5.385(±0.811) | 4   | 0.355 | 0.235 |
| DMS114     | 1.373(±5.319)   | 7.685(±1.633) | 4   | 0.382 | 0.473 |
| LOX-IMVI   | 1.163(±14.283)  | 6.677(±4.385) | 4   | 0.058 | 1.271 |
| OVCAR-3    | -1.596(±8.552)  | 4.669(±2.626) | 4   | 0.244 | 0.761 |
| OVCAR-4    | -1.212(±5.590)  | 4.877(±1.716) | 4   | 0.303 | 0.497 |
| OVCAR-5    | -1.883(±7.613)  | 4.491(±2.337) | 4   | 0.361 | 0.677 |
| OVCAR-8    | -0.972(±6.677)  | 4.972(±2.050) | 4   | 0.164 | 0.594 |
| SK-OV-3    | -1.533(±8.340)  | 4.512(±2.560) | 4   | 0.238 | 0.742 |
| RXF-631L   | -1.205(±8.489)  | 4.618(±2.606) | 4   | 0.157 | 0.755 |
| ACHN       | -1.342(±3.955)  | 4.803(±1.214) | 4   | 0.516 | 0.352 |
| St-4       | -0.780(±5.114)  | 5.030(±1.570) | 4   | 0.177 | 0.455 |
| MKN1       | -0.598(±8.287)  | 4.979(±2.544) | 4   | 0.046 | 0.737 |
| MKN-B      | 1.465(±7.307)   | 7.554(±2.243) | 4   | 0.271 | 0.650 |
| MKN-A      | 0.548(±10.300)  | 7.037(±3.162) | 4   | 0.026 | 0.917 |
| MKN45      | -0.608(±4.631)  | 5.061(±1.422) | 4   | 0.138 | 0.412 |
| MKN74      | -0.483(±2.760)  | 5.624(±0.847) | 4   | 0.221 | 0.246 |
| DU-145     | -0.682(±7.481)  | 4.591(±2.297) | 4   | 0.071 | 0.666 |
| PC-3       | 0.142(±5.919)   | 5.359(±1.817) | 4   | 0.005 | 0.527 |

**Table S2B.** QSAR models of the relationships between the  $\text{Log}(1/\text{GI}_{50})$  and XLOP3 of partial structure of analogs in group B (**1**, and **7i-7k**).  $n$  is the number of compounds,  $r$  is the correlation coefficient,  $s$  is the standard deviation, and the figures in parentheses are the 95% confidence intervals.

$$\text{Log}(1/\text{GI}_{50}) = a \text{XLOGP3} + b$$

| cell line  | $a$            | $b$           | $n$ | $r^2$ | $s$   |
|------------|----------------|---------------|-----|-------|-------|
| HBC-4      | -0.031(±0.626) | 4.090(±0.522) | 4   | 0.022 | 0.176 |
| BSY-1      | 0.097(±3.954)  | 4.712(±3.295) | 4   | 0.006 | 1.109 |
| HBC-5      | 0.030(±1.214)  | 4.170(±1.012) | 4   | 0.006 | 0.340 |
| MCF-7      | 0.328(±0.940)  | 4.279(±0.783) | 4   | 0.531 | 0.264 |
| MDA-MB-231 | 0.305(±0.407)  | 3.999(±0.339) | 4   | 0.839 | 0.114 |
| U251       | -0.017(±0.345) | 4.050(±0.288) | 4   | 0.022 | 0.097 |
| SF-268     | 0.000(±0.000)  | 4.000(±0.000) | 4   | NaN   | 0.000 |
| SF-295     | 0.222(±0.254)  | 4.350(±0.212) | 4   | 0.876 | 0.071 |
| SF-539     | 0.250(±0.552)  | 3.964(±0.460) | 4   | 0.654 | 0.155 |
| SNB-75     | 0.000(±0.000)  | 4.000(±0.000) | 4   | NaN   | 0.000 |
| SNB-78     | -0.037(±0.756) | 4.109(±0.630) | 4   | 0.022 | 0.212 |
| HCC2998    | 0.023(±0.676)  | 4.094(±0.563) | 4   | 0.011 | 0.190 |
| KM-12      | 0.013(±1.452)  | 4.205(±1.210) | 4   | 0.001 | 0.407 |
| HT-29      | 0.023(±0.960)  | 4.154(±0.800) | 4   | 0.005 | 0.269 |
| HCT-15     | -0.034(±0.691) | 4.100(±0.576) | 4   | 0.022 | 0.194 |
| HCT-116    | 0.552(±2.980)  | 4.858(±2.484) | 4   | 0.241 | 0.836 |
| NCI-H23    | 0.896(±0.438)  | 4.732(±0.365) | 4   | 0.975 | 0.123 |
| NCI-H226   | 0.103(±1.064)  | 4.348(±0.887) | 4   | 0.080 | 0.298 |
| NCI-H522   | 0.550(±1.228)  | 4.884(±1.024) | 4   | 0.650 | 0.344 |
| NCI-H460   | -0.049(±0.993) | 4.143(±0.828) | 4   | 0.022 | 0.279 |
| A549       | 0.274(±0.572)  | 4.045(±0.477) | 4   | 0.680 | 0.160 |
| DMS273     | 0.165(±0.605)  | 4.163(±0.504) | 4   | 0.408 | 0.170 |
| DMS114     | 0.477(±1.740)  | 5.933(±1.450) | 4   | 0.410 | 0.488 |
| LOX-IMVI   | -0.027(±2.013) | 4.408(±1.677) | 4   | 0.002 | 0.564 |
| OVCAR-3    | 0.000(±0.000)  | 4.000(±0.000) | 4   | NaN   | 0.000 |
| OVCAR-4    | 0.250(±0.552)  | 3.964(±0.460) | 4   | 0.654 | 0.155 |
| OVCAR-5    | 0.000(±0.000)  | 4.000(±0.000) | 4   | NaN   | 0.000 |
| OVCAR-8    | 0.000(±0.000)  | 4.000(±0.000) | 4   | NaN   | 0.000 |
| SK-OV-3    | 0.064(±0.141)  | 3.991(±0.118) | 4   | 0.654 | 0.040 |
| RXF-631L   | 0.000(±0.000)  | 4.000(±0.000) | 4   | NaN   | 0.000 |
| ACHN       | 0.009(±0.495)  | 4.070(±0.413) | 4   | 0.003 | 0.139 |
| St-4       | 0.057(±1.036)  | 4.150(±0.864) | 4   | 0.027 | 0.291 |
| MKN1       | -0.038(±0.777) | 4.112(±0.648) | 4   | 0.022 | 0.218 |
| MKN-B      | 0.197(±2.726)  | 5.214(±2.272) | 4   | 0.046 | 0.764 |
| MKN-A      | 0.195(±3.067)  | 4.813(±2.556) | 4   | 0.036 | 0.860 |
| MKN45      | 0.209(±4.541)  | 4.405(±3.785) | 4   | 0.019 | 1.274 |
| MKN74      | 0.363(±0.514)  | 4.194(±0.428) | 4   | 0.822 | 0.144 |
| DU-145     | 0.000(±0.000)  | 4.000(±0.000) | 4   | NaN   | 0.000 |
| PC-3       | -0.010(±1.315) | 4.266(±1.096) | 4   | 0.001 | 0.369 |



DFILE E:\NMR\C10 TBS T  
 COMNT  
 DATIM Wed Feb 17 14:17  
 OBNUC 1H  
 EXMOD non  
 OBFRQ 500.00 MHz  
 OBSET 0.00 KHz  
 OBFIN 162160.00 Hz  
 POINT 8192  
 FREQU 10000.00 Hz  
 SCANS 100  
 ACQTM 0.8192 sec  
 PD 6.1808 sec  
 PW1 5.70 use  
 IRNUC 1H  
 CTEMP 24.3 C  
 SLVNT CDCL3  
 EXREF 0.00 ppm  
 BF 0.12 Hz  
 RGAIN 9

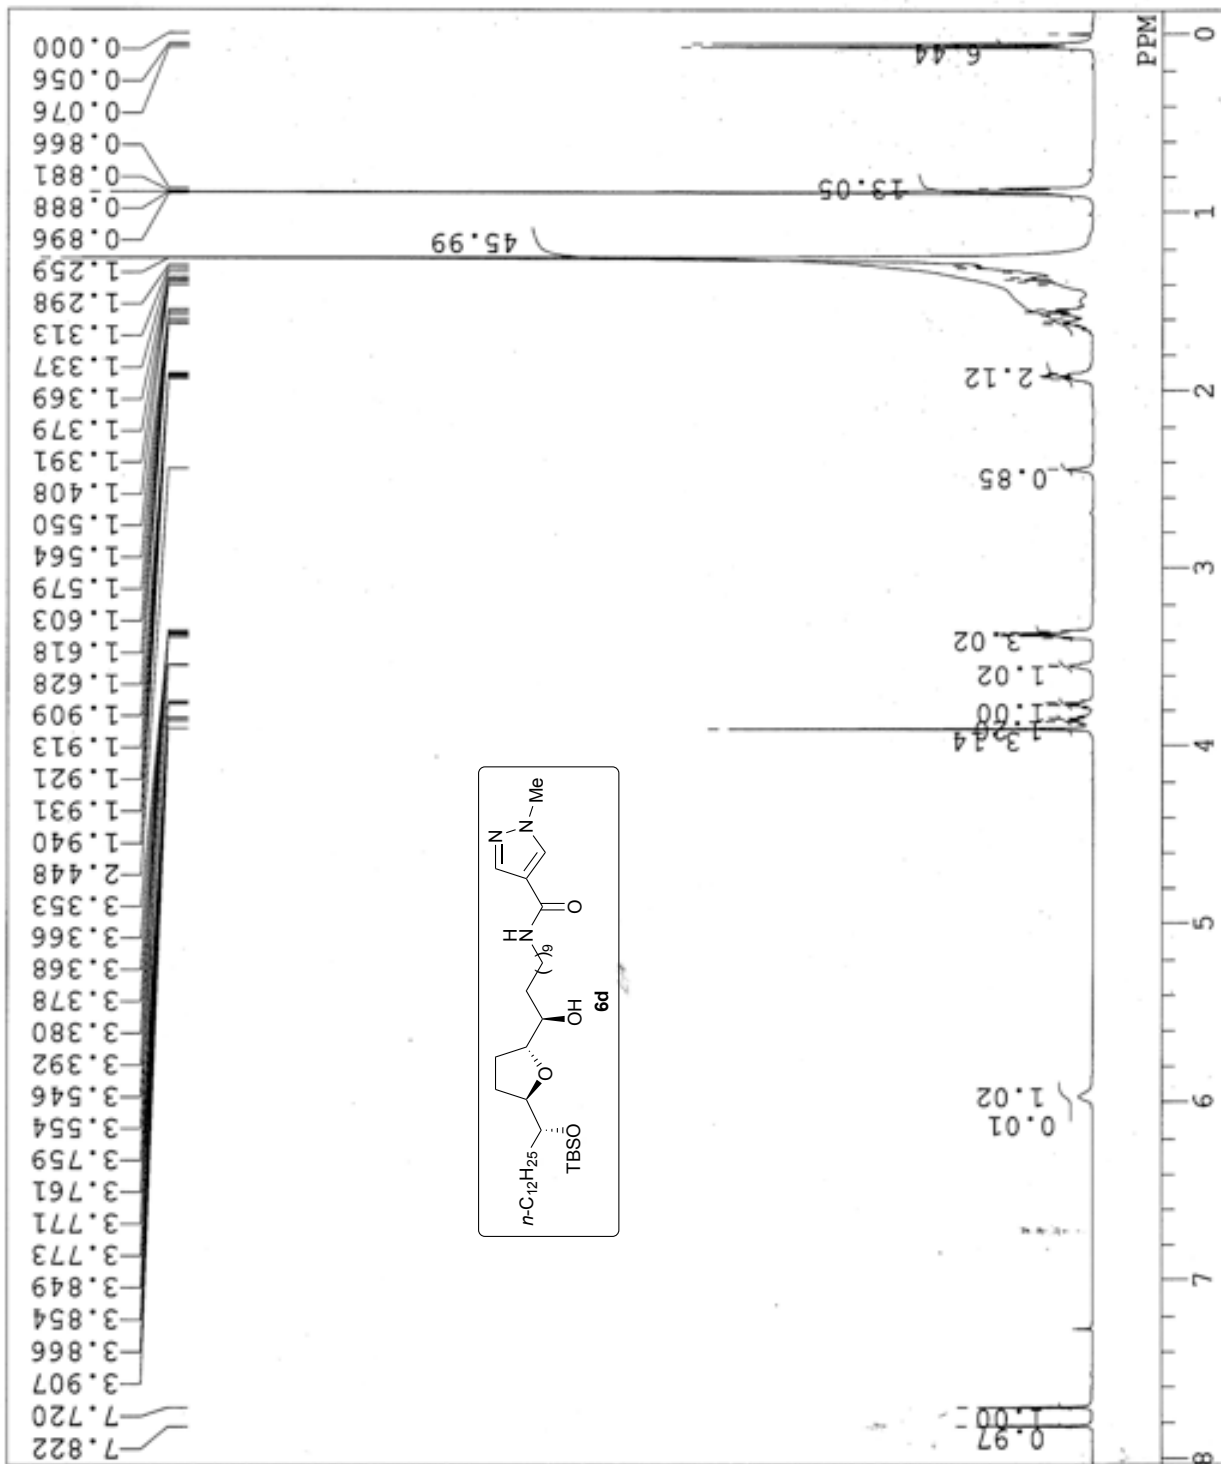

E:\NMR\C10 TBS T  
 Wed Feb 17 15:00  
 13C  
 bcm  
 125.65 MHz  
 0.00 KHz  
 127958.00 Hz  
 32768  
 33898.30 Hz  
 500  
 0.9667 sec  
 2.0333 sec  
 5.00 use  
 1H  
 26.6 C  
 CDCL3  
 77.00 ppm  
 1.20 Hz  
 26

DFILE  
 COMNT  
 DATIM  
 OBNUC  
 EXMOD  
 OBFRQ  
 OBSET  
 OBFIN  
 POINT  
 FREQU  
 SCANS  
 ACQTM  
 PD  
 PW1  
 IRNUC  
 CTEMP  
 SLVNT  
 EXREF  
 BF  
 RGAIN

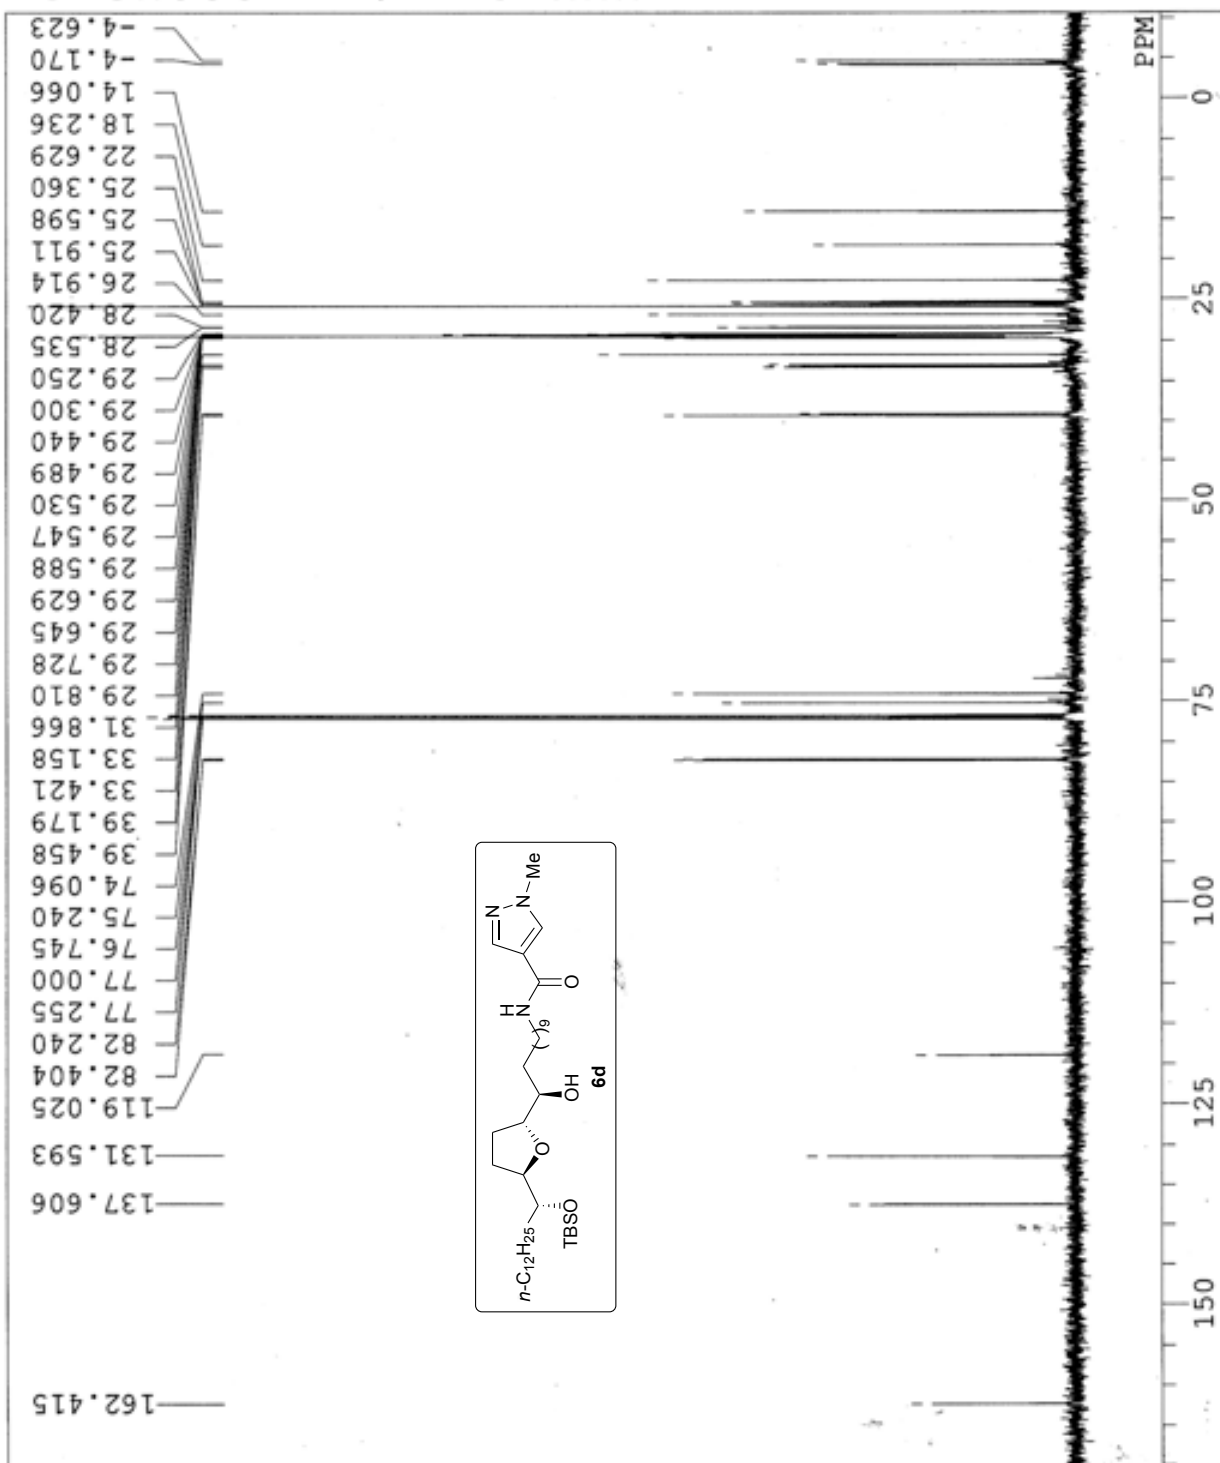

DFILE F:\500nmr\TBS TH  
 COMNT 0827  
 DATIM Wed Aug 27 19:31  
 OBNUC 1H  
 EXMOD non  
 OBFRQ 500.00 MHz  
 OBSET 0.00 KHz  
 OBFIN 162160.00 Hz  
 POINT 8192  
 FREQU 10000.00 Hz  
 SCANS 8  
 ACQTM 0.8192 sec  
 PD 6.1808 sec  
 PW1 5.40 use  
 IRNUC 1H  
 CTEMP 21.9 C  
 SLVNT CDCL3  
 EXREF 0.00 ppm  
 BF 0.12 Hz  
 RGAIN 12

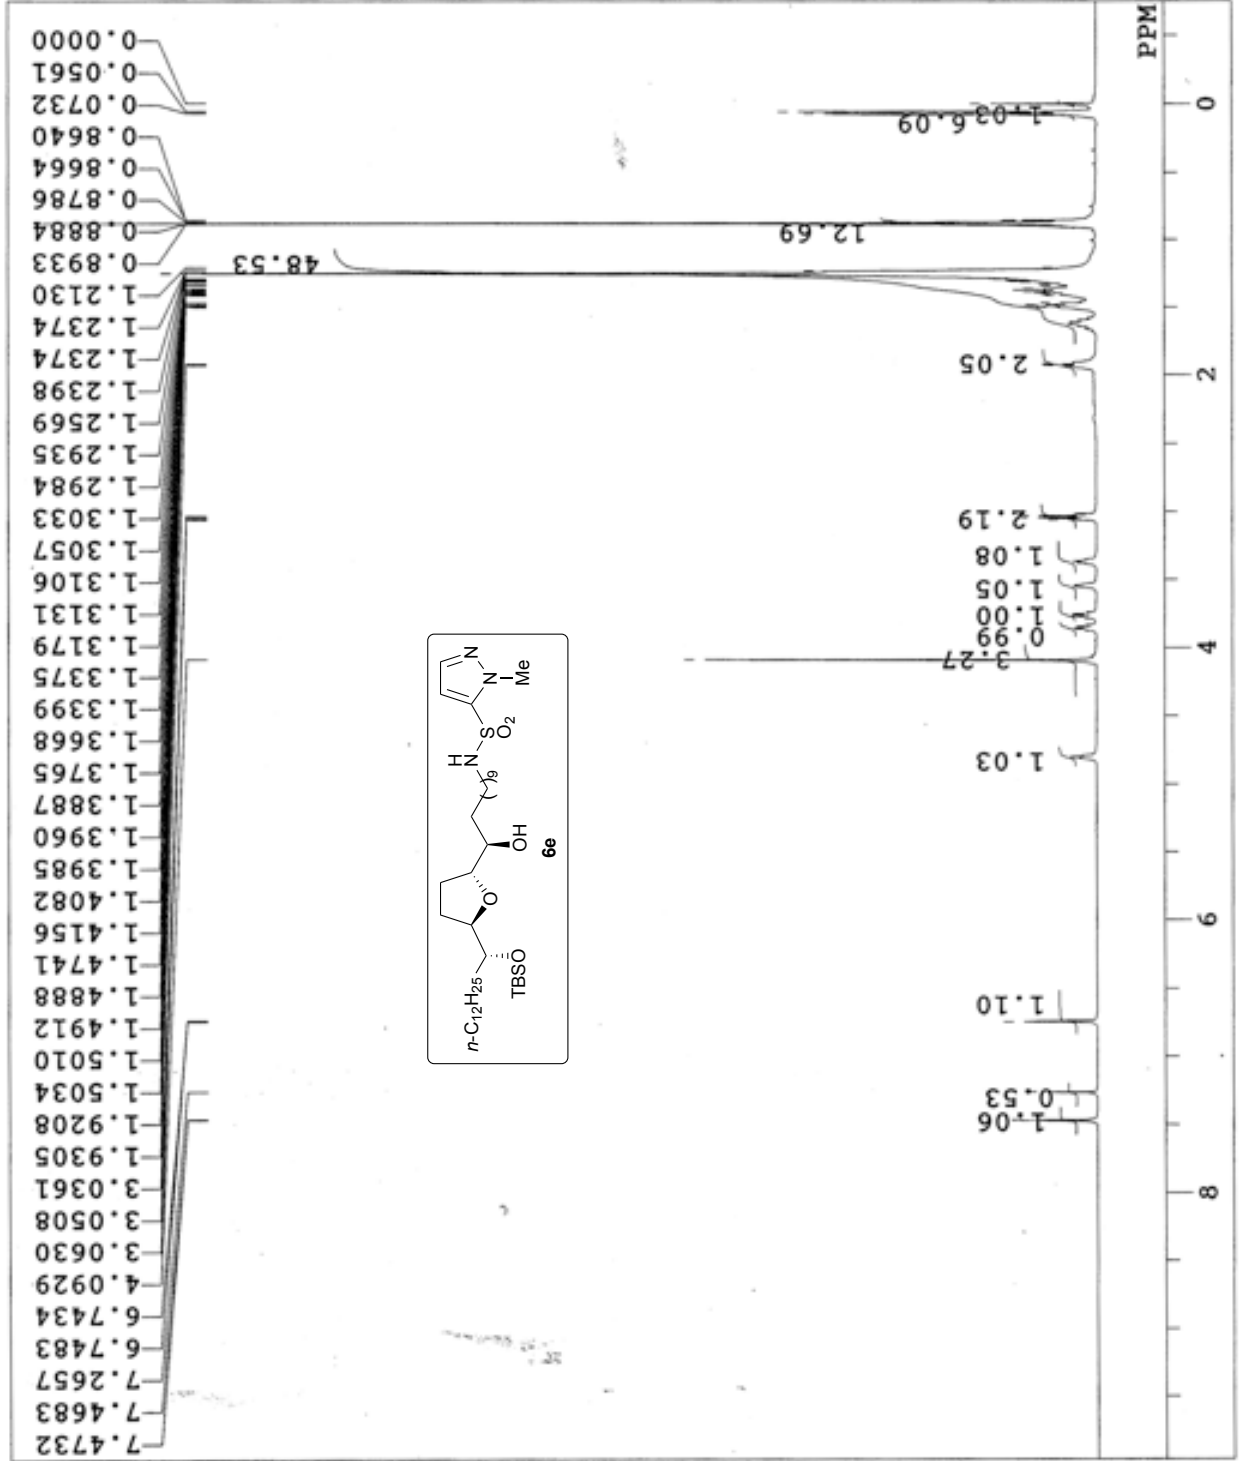

F:\500nmr\TBS TH  
 0827  
 Wed Aug 27 19:38  
 13C  
 bcm  
 125.65 MHz  
 0.00 KHz  
 127958.00 Hz  
 32768  
 33898.30 Hz  
 150  
 0.9667 sec  
 2.0333 sec  
 5.00 use  
 1H  
 22.5 C  
 CDCL3  
 77.00 ppm  
 1.20 Hz  
 26

DFILE  
 COMNT  
 DATIM  
 OBNUC  
 EXMOD  
 OBFRQ  
 OBSET  
 OBFIN  
 POINT  
 FREQU  
 SCANS  
 ACQTM  
 PD  
 PW1  
 IRNUC  
 CTEMP  
 SLVNT  
 EXREF  
 BF  
 RGAIN

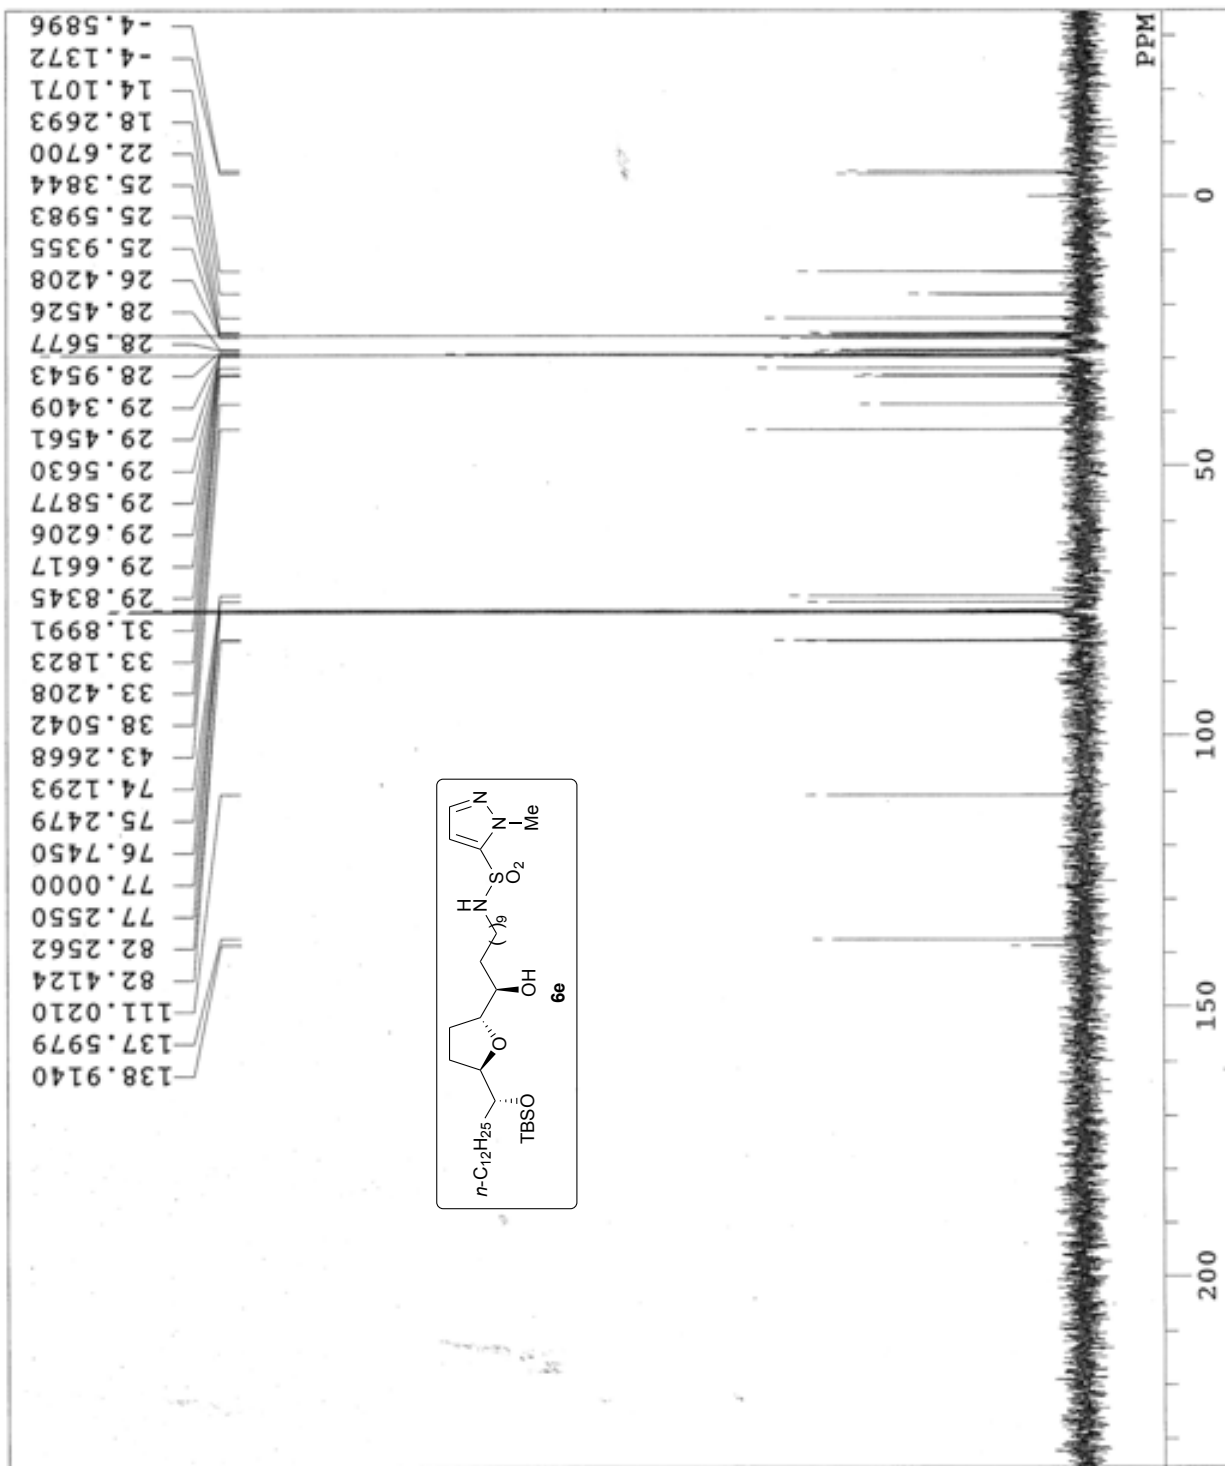

F:\500nmr\TBS  
 DFILE  
 COMNT  
 DATIM Wed Dec 10 12:  
 OBNUC 1H  
 EXMOD non  
 OBFRQ 500.00 M  
 OBSET 0.00 K  
 OBFIN 162160.00 H  
 POINT 16384  
 FREQU 10000.00 H  
 SCANS 16  
 ACQTM 1.6384 s  
 PD 5.3616 s  
 PW1 5;40 u  
 IRNUC 1H  
 CTEMP 24.5 C  
 SLVNT CDCL3  
 EXREF 0.00 P  
 BF 1.20 H  
 RGAIN 14

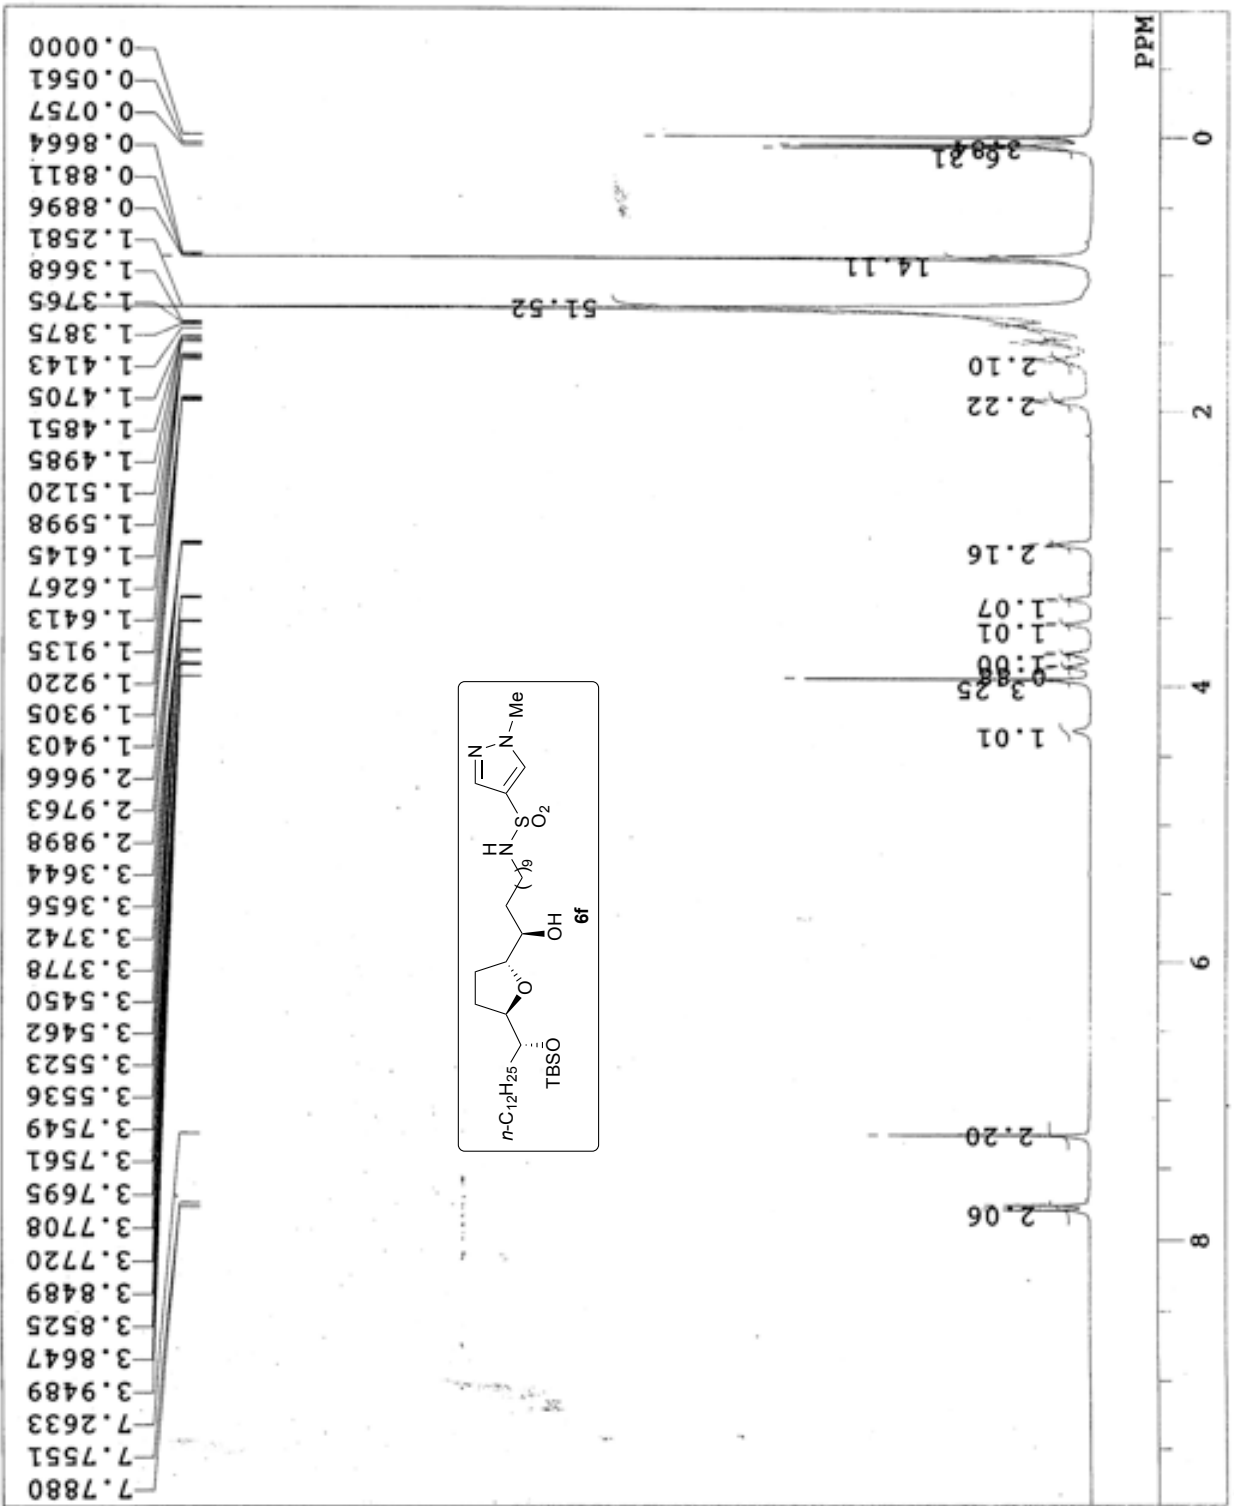

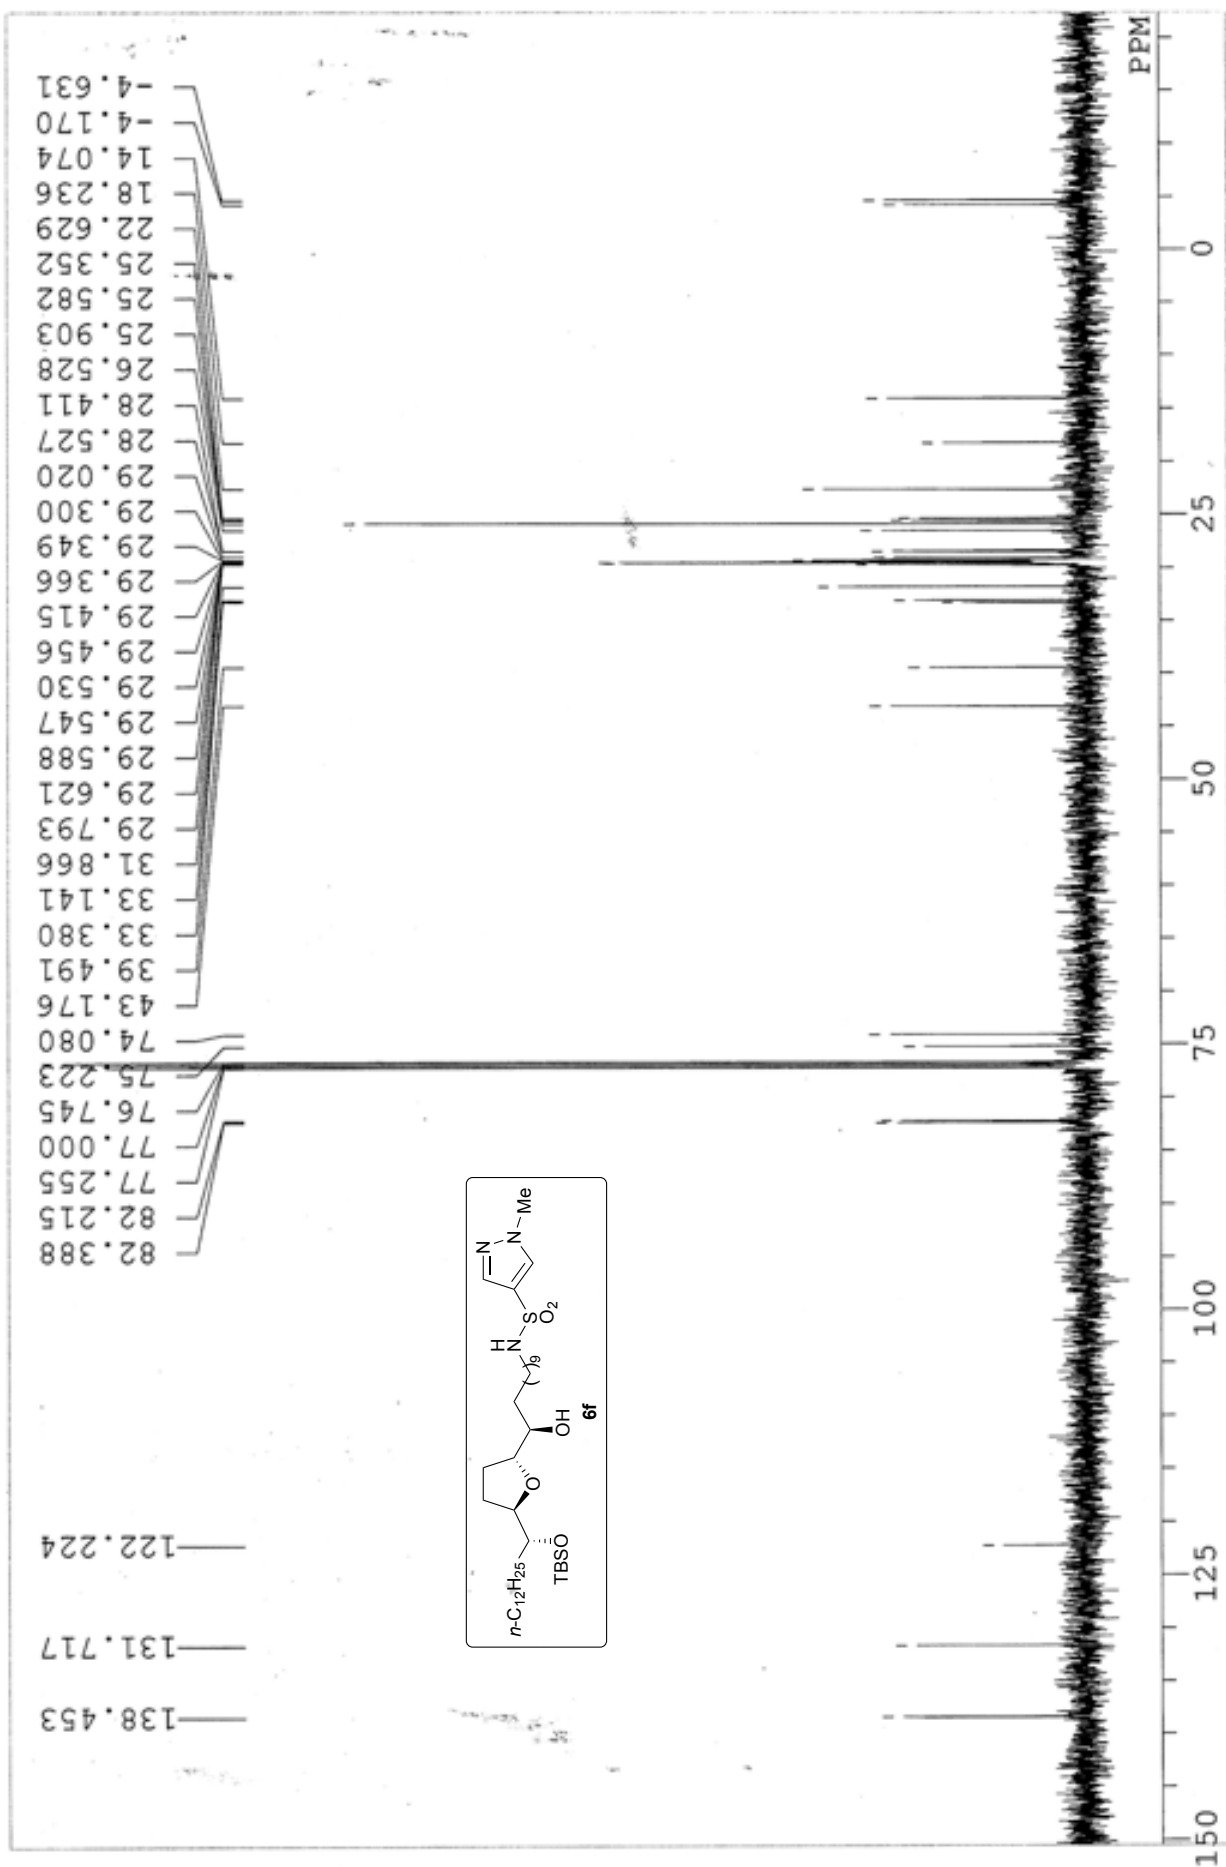

F:\NMR\THF amido ethyl

DFILE 1H Line  
COMNT Wed Jun 6 16:33:56 20  
DATIM 1H  
OBNUC non  
EXMOD  
OBFREQ 500.00 MHz  
OBSET 160.00 KHz  
OBFIN 2167.63 Hz  
POINT 16384  
FREQU 10000.00 Hz  
SCANS 16  
ACQTM 1.6384 sec  
PD 5.3616 sec  
FW 5.50 usec  
IRNUC 1H  
CTEMP 20.9 C  
SLVNT CDCL3  
EXREF 0.00 ppm  
BF 0.12 Hz  
RGAIN 14

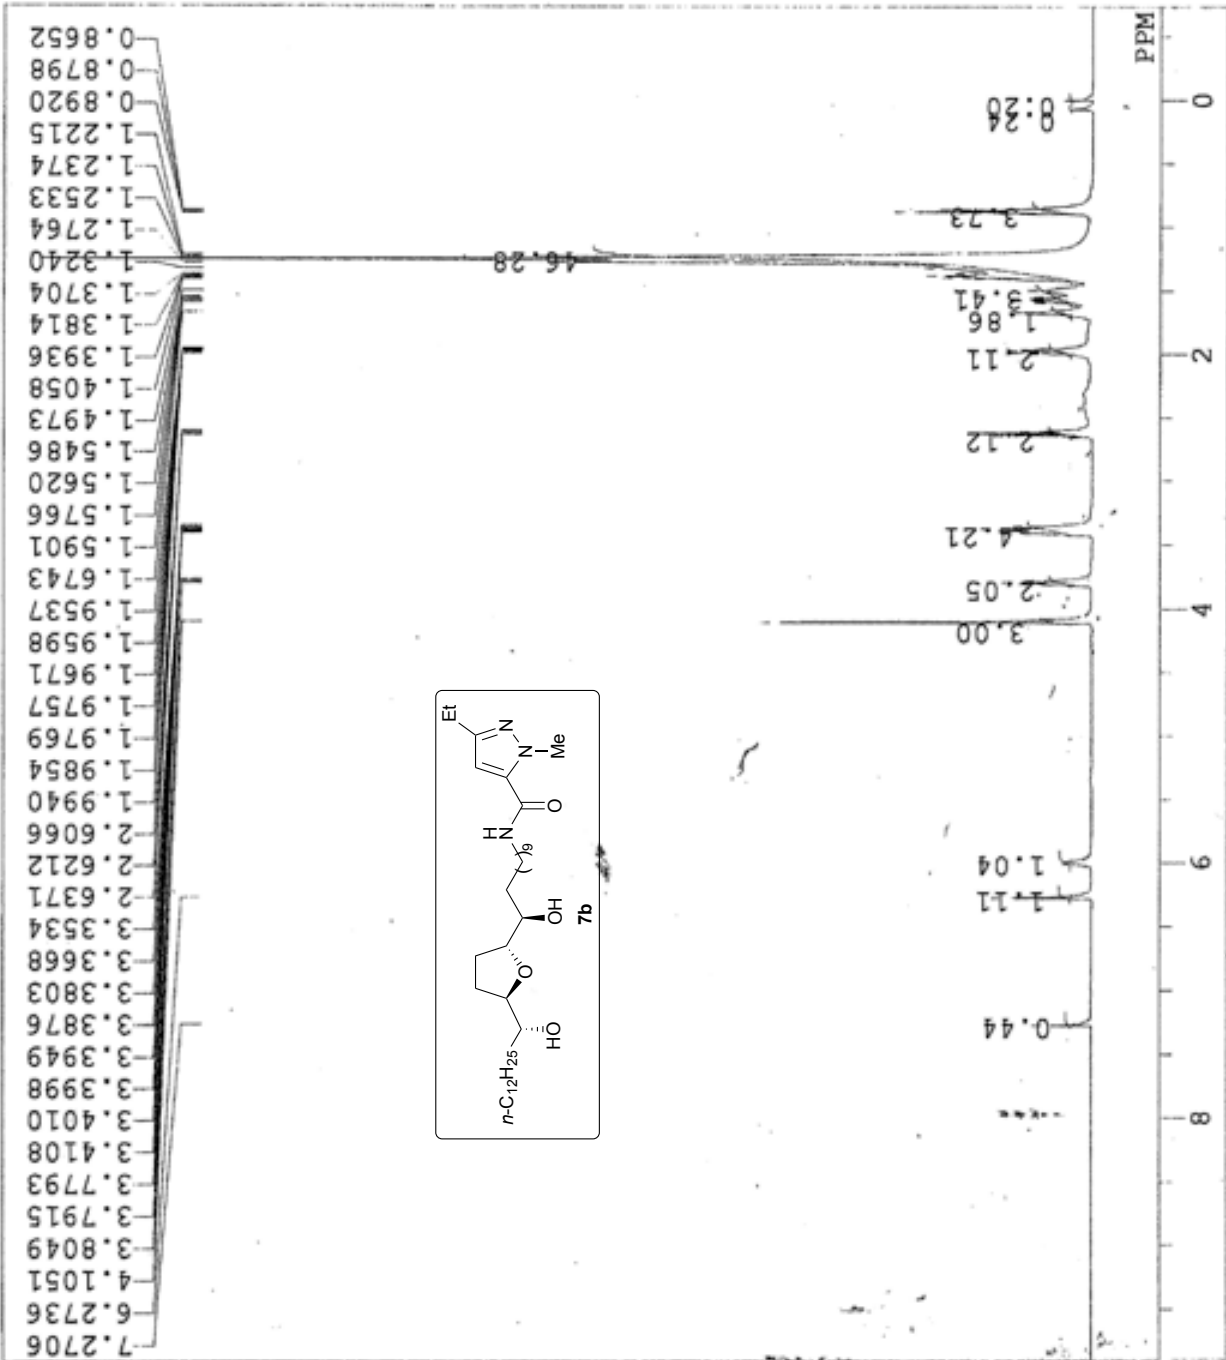

DFILE F:\300C\THFethyl  
 COMNT 070613  
 DATIM Thu Jun 14 01:57  
 OBNUC 13C  
 EXMOD BCM  
 OBFREQ 75.45 MHz  
 OBSET 124.00 KHz  
 OBFIN 1840.00 Hz  
 POINT 32768  
 FREQU 20356.23 Hz  
 SCANS 2000  
 ACQTM 1.6097 sec  
 PD 1.3900 sec  
 PW1 4.60 use  
 IRNUC 1H  
 CTEMP 20.4 C  
 SLVNT CDCL3  
 EXREF 77.00 ppm  
 BF 1.20 Hz  
 RGAIN 24

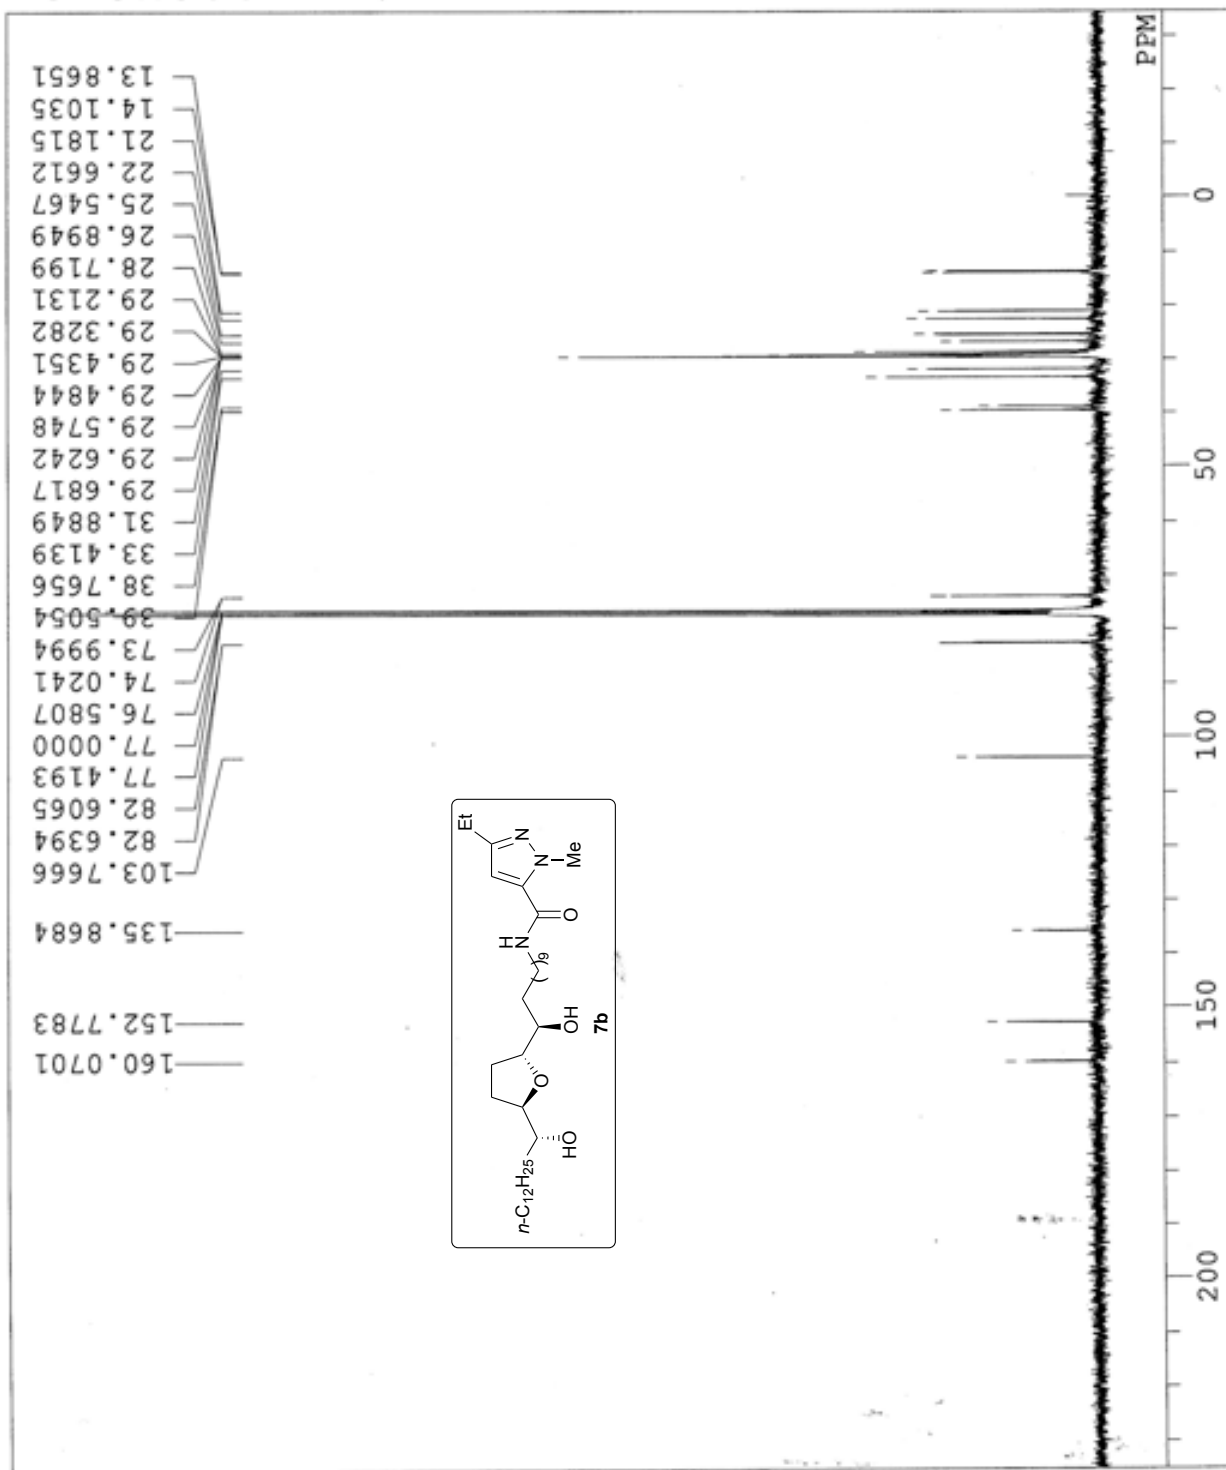



F:\NMR\THF amido ethyl

1H Line

Wed May 30 14:56:20 20

1H

non

500.00 MHz

160.00 KHz

2167.63 Hz

16384

10000.00 Hz

32

1.6384 sec

5.3616 sec

5.50 usec

1H

21.3 C

0.00 ppm

0.80 Hz

18

DFILE

COMNT

DATIM

OBNUC

EXMOD

OBFRQ

OBSET

OBFIN

POINT

FREQU

SCANS

ACQTM

PD

PW1

IRNUC

CTEMP

SLVNT

EXREF

BF

RGAIN

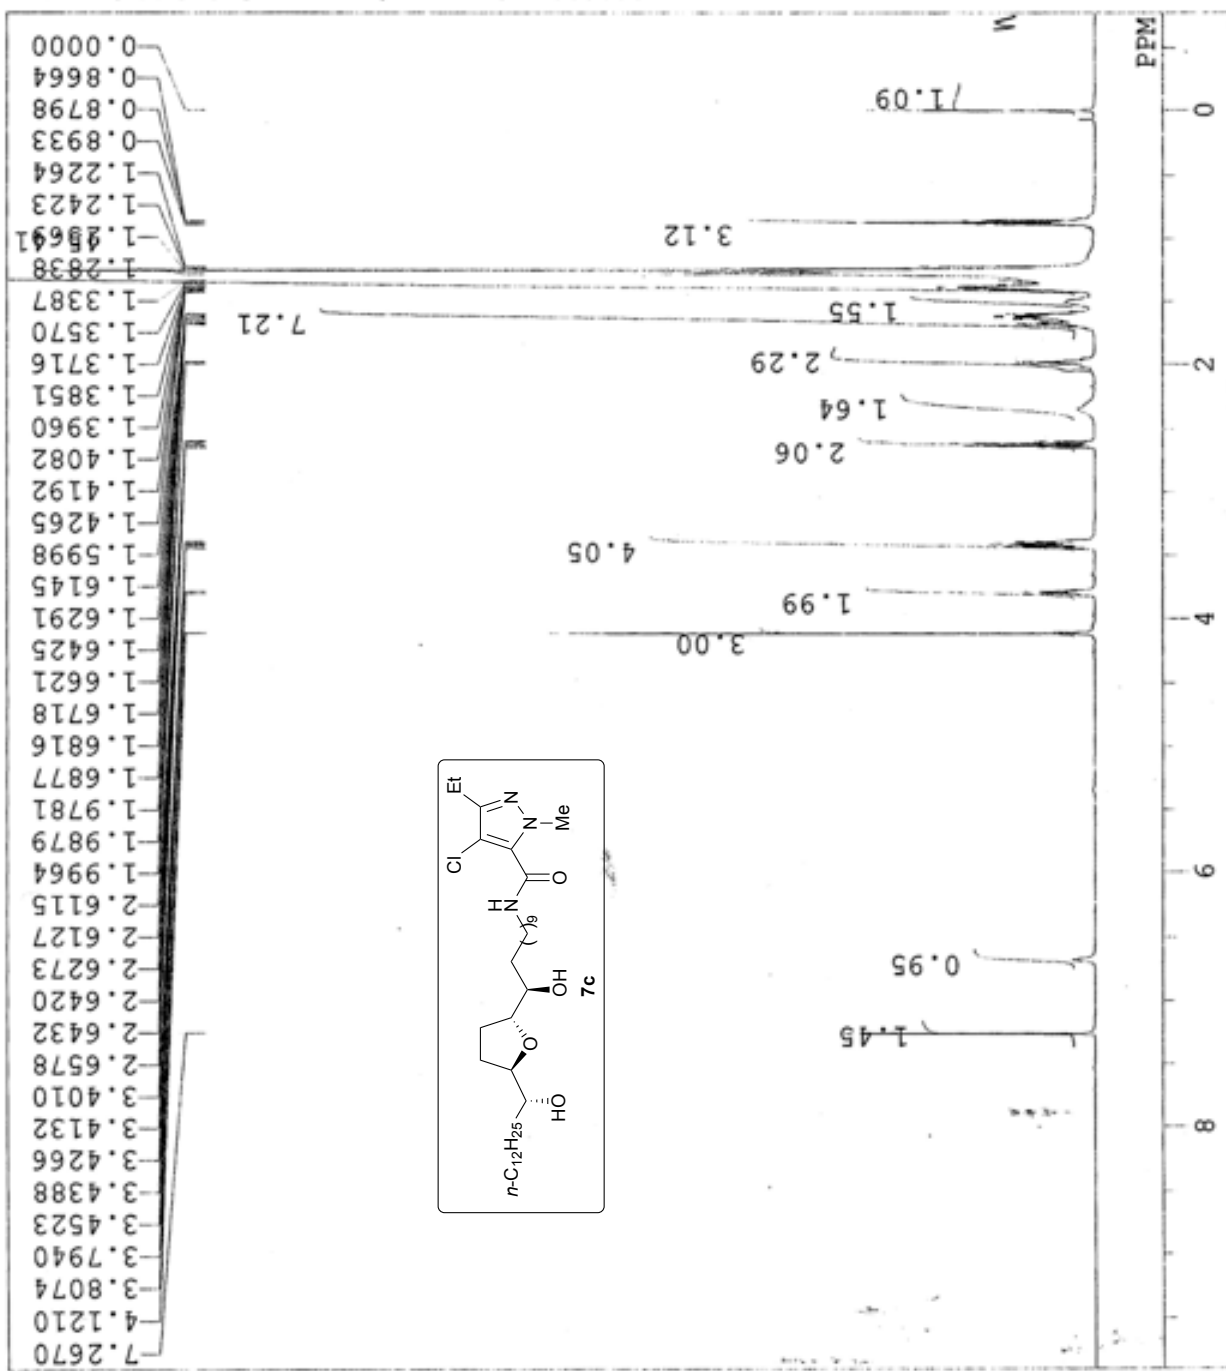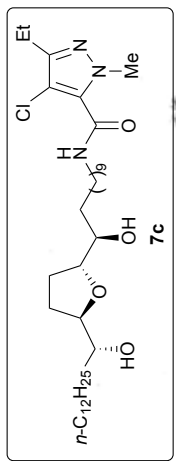

DFILE F:\300C\THF C1 e  
 COMNT 0729-4  
 DATIM Sun Jul 29 21:36  
 OBNUC 13C  
 EXMOD BCM  
 OBFRQ 75.45 MHz  
 OBSET 124.00 KHz  
 OBFIN 1840.00 Hz  
 POINT 32768  
 FREQU 20356.23 Hz  
 SCANS 800  
 ACQTM 1.6097 sec  
 PD 1.3900 sec  
 PW1 4.60 use  
 IRNUC 1H  
 CTEMP 33.0 C  
 SLVNT CDCL3  
 EXREF 77.00 ppm  
 BF 1.20 Hz  
 RGAIN 27

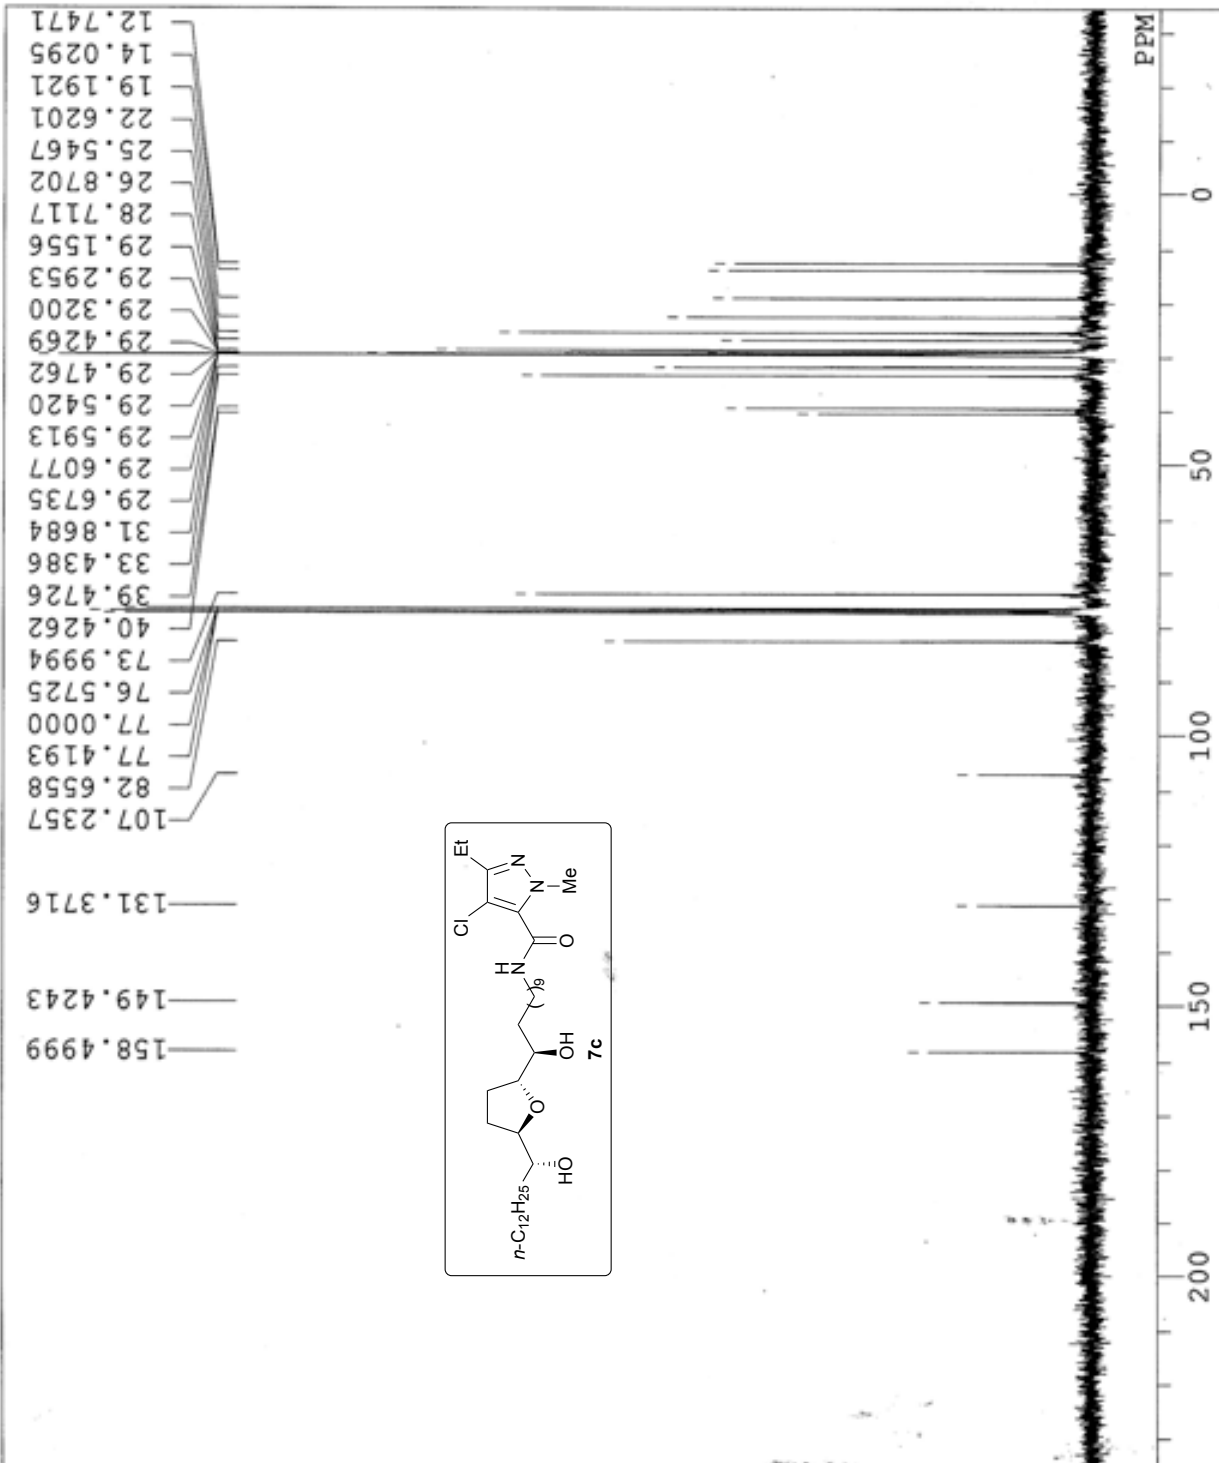

G:\500 NMR\THF 4 pyra  
 1H Line  
 Mon Aug 6 10:50:34 20  
 1H  
 non  
 500.00 MHz  
 160.00 KHz  
 2167.63 Hz  
 16384  
 10000.00 Hz  
 16  
 1.6384 sec  
 5.3616 sec  
 5.50 usec  
 22.9 °C  
 0.00 ppm  
 1.20 Hz  
 22

DFILE  
 COMNT  
 DATIM  
 OBNUC  
 EXMOD  
 OBFRQ  
 OBSET  
 OBFIN  
 POINT  
 FREQU  
 SCANS  
 ACQTM  
 PD  
 PW1  
 IRNUC  
 CTEMP  
 SLVNT  
 EXREF  
 BF  
 RGAIN

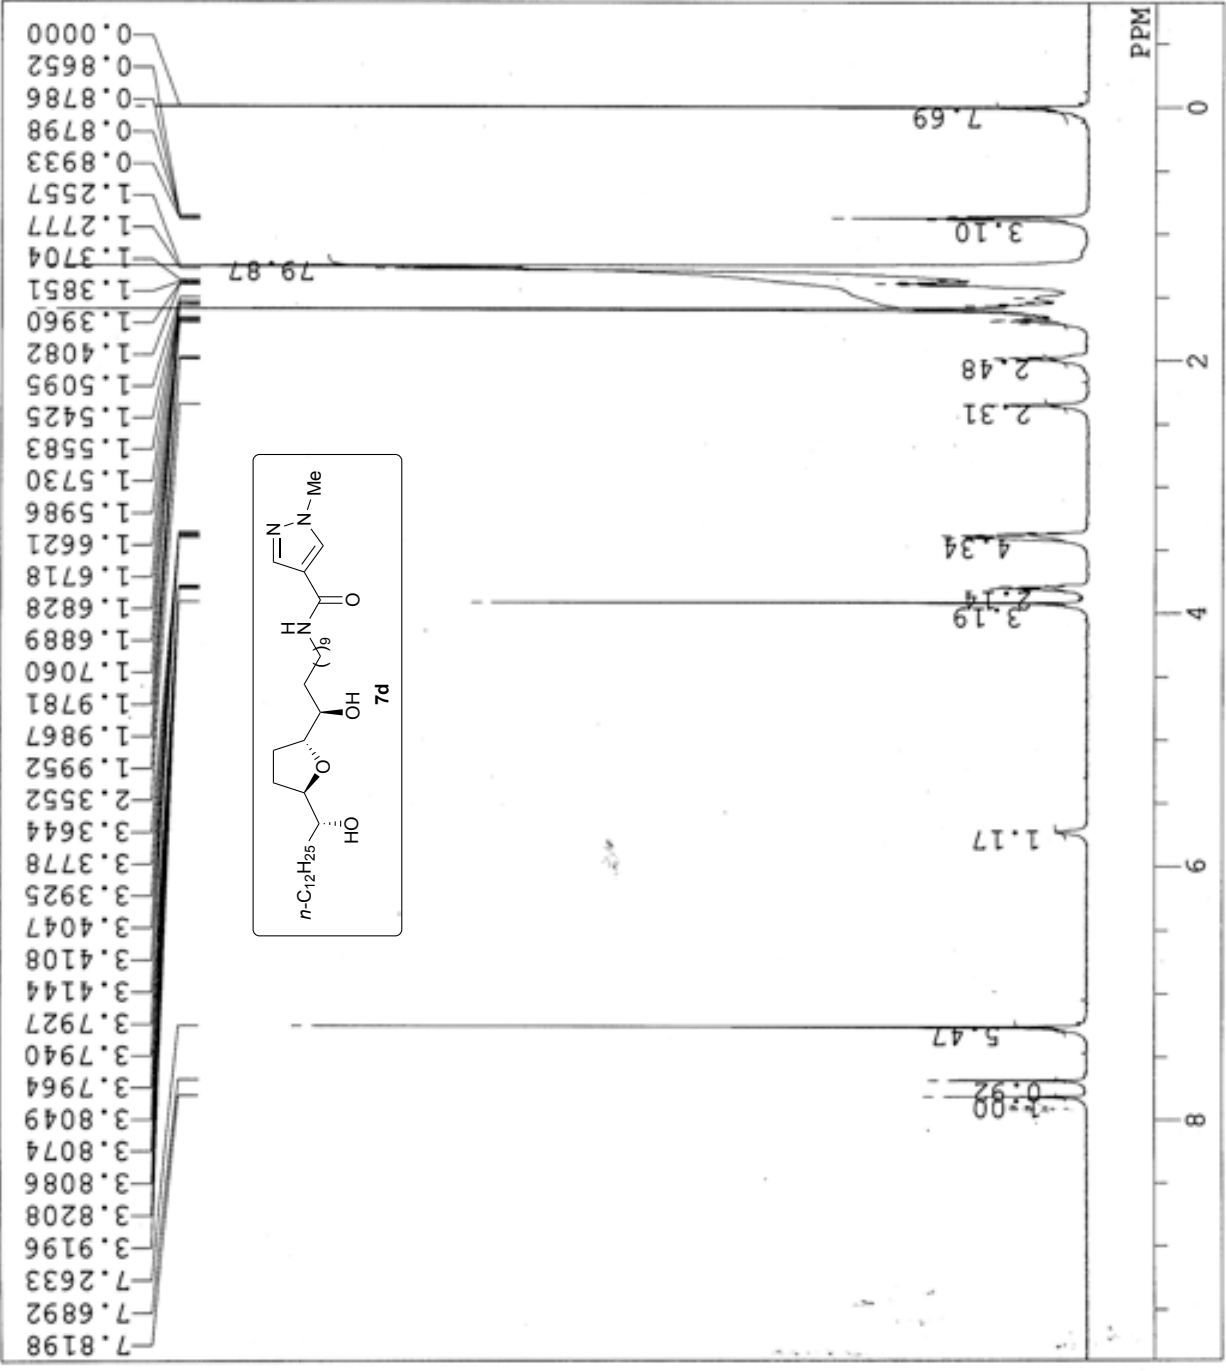

DFILE F:\300C\THF 4pyr  
 COMNT 0729-3  
 DATIM Sun Jul 29 17:51  
 OBNUC 13C  
 EXMOD BCM  
 OBFRQ 75.45 MHz  
 OBSET 124.00 KHz  
 OBFIN 1840.00 Hz  
 POINT 32768  
 FREQU 20356.23 Hz  
 SCANS 800  
 ACQTM 1.6097 sec  
 PD 1.3900 sec  
 PW1 4.60 use  
 IRNUC 1H  
 CTEMP 33.1 C  
 SLVNT CDCL3  
 EXREF 77.00 ppm  
 BF 1.20 Hz  
 RGAIN 27

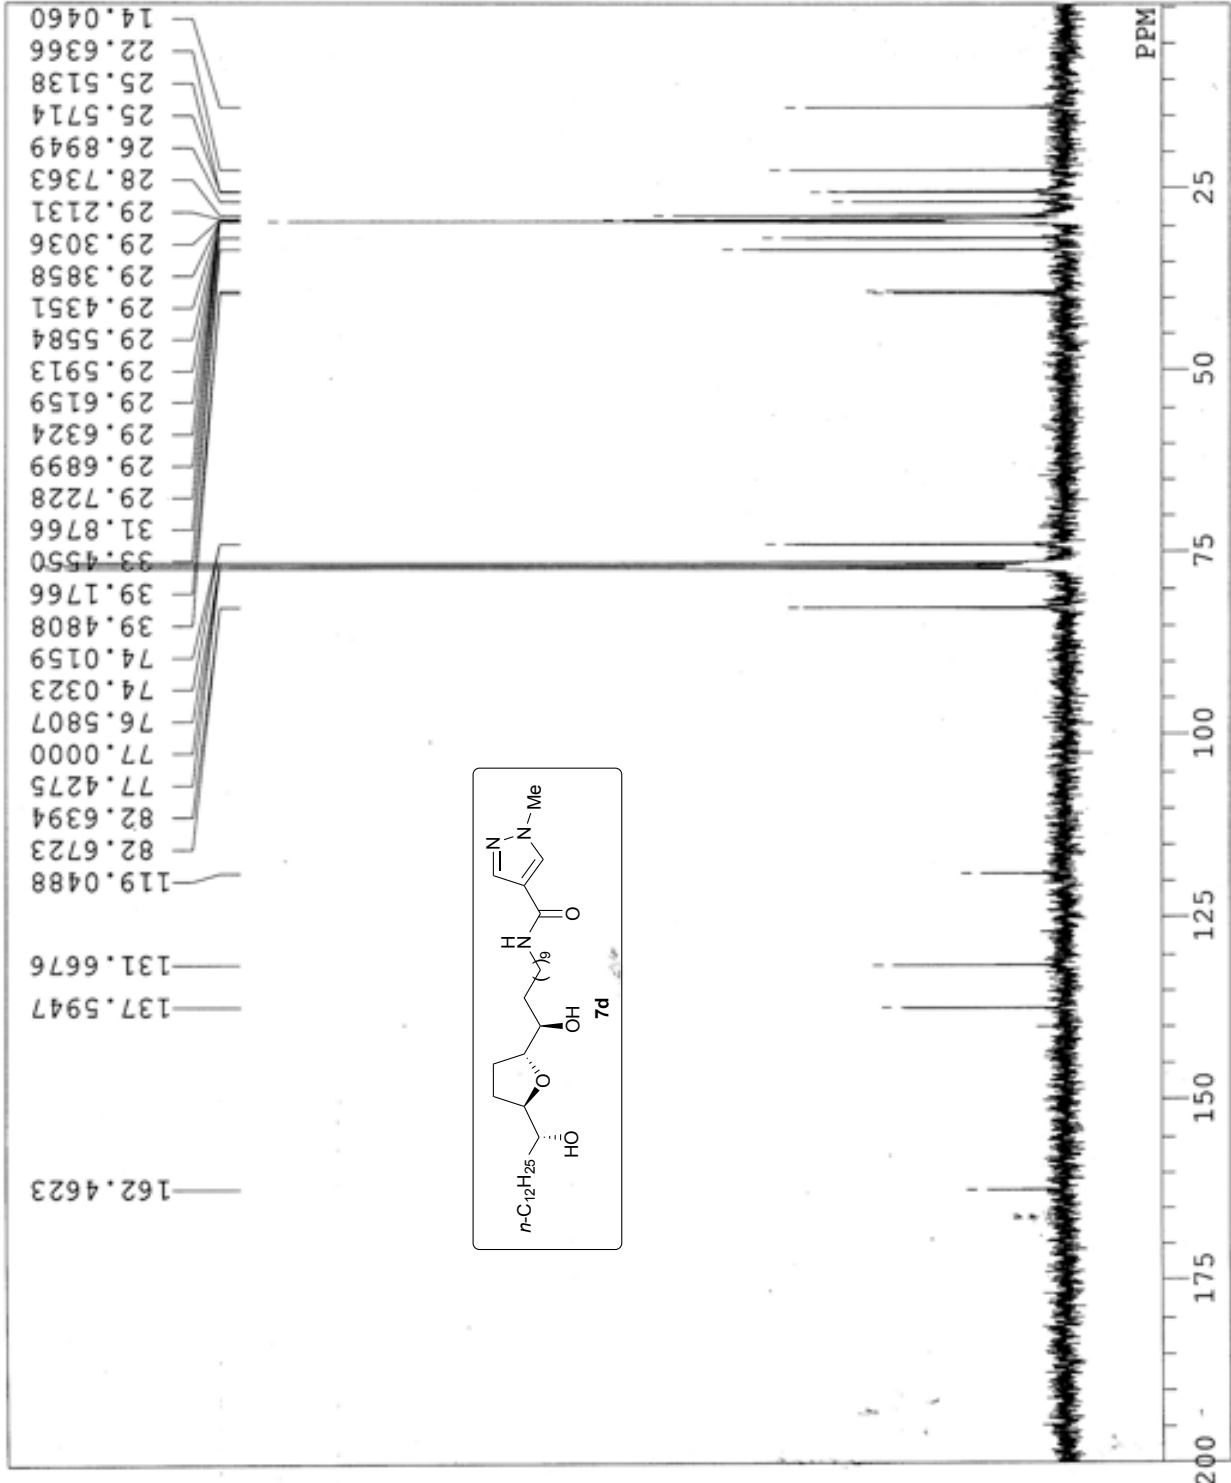

DFILE F:\500nmr\THF C1  
 COMNT  
 DATIM Wed Sep 24 13:50  
 OBNUC 1H  
 EXMOD non  
 OBFRQ 500.00 MHz  
 OBSET 0.00 KHz  
 OBFIN 162160.00 Hz  
 POINT 16384  
 FREQU 10000.00 Hz  
 SCANS 34  
 ACQTM 1.6384 sec  
 PD 5.3620 sec  
 PW1 5.40 use  
 IRNUC 1H  
 CTEMP 20.7 C  
 SLVNT CDCL3  
 EXREF 0.00 ppm  
 BF 0.32 Hz  
 RGAIN 12

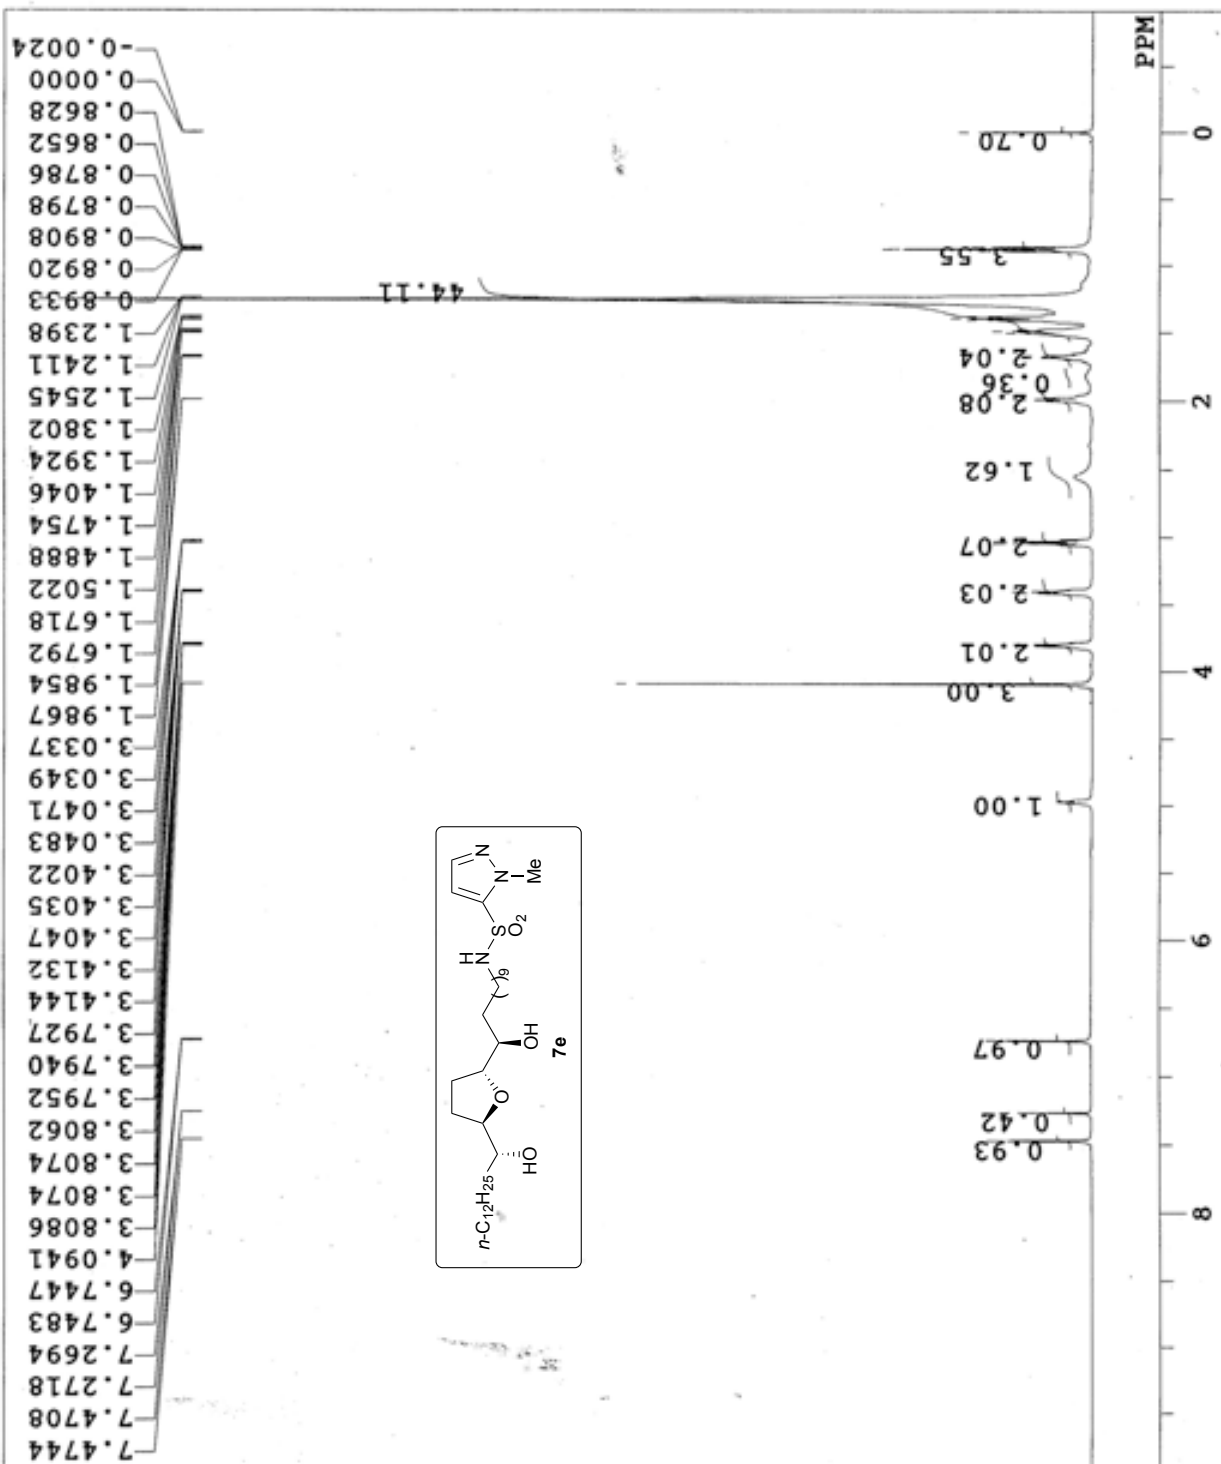

DFILE F:\500nmr\THF\_C1  
 COMNT Wed Sep 24 14:35  
 DATIM 13C  
 OBNUC bcm  
 EXMOD 125.65 MHz  
 OBFRQ 0.00 KHz  
 OBSET 127958.00 Hz  
 OBFIN 32768  
 POINT 33898.30 Hz  
 FREQU 868  
 SCANS 0.9667 sec  
 ACQTM 2.0333 sec  
 PD 5.00 use  
 PW1 1H  
 IRNUC 23.0 C  
 CTEMP CDCL3  
 SLVNT 77.00 ppm  
 EXREF 0.32 Hz  
 BF 28  
 RGAIN

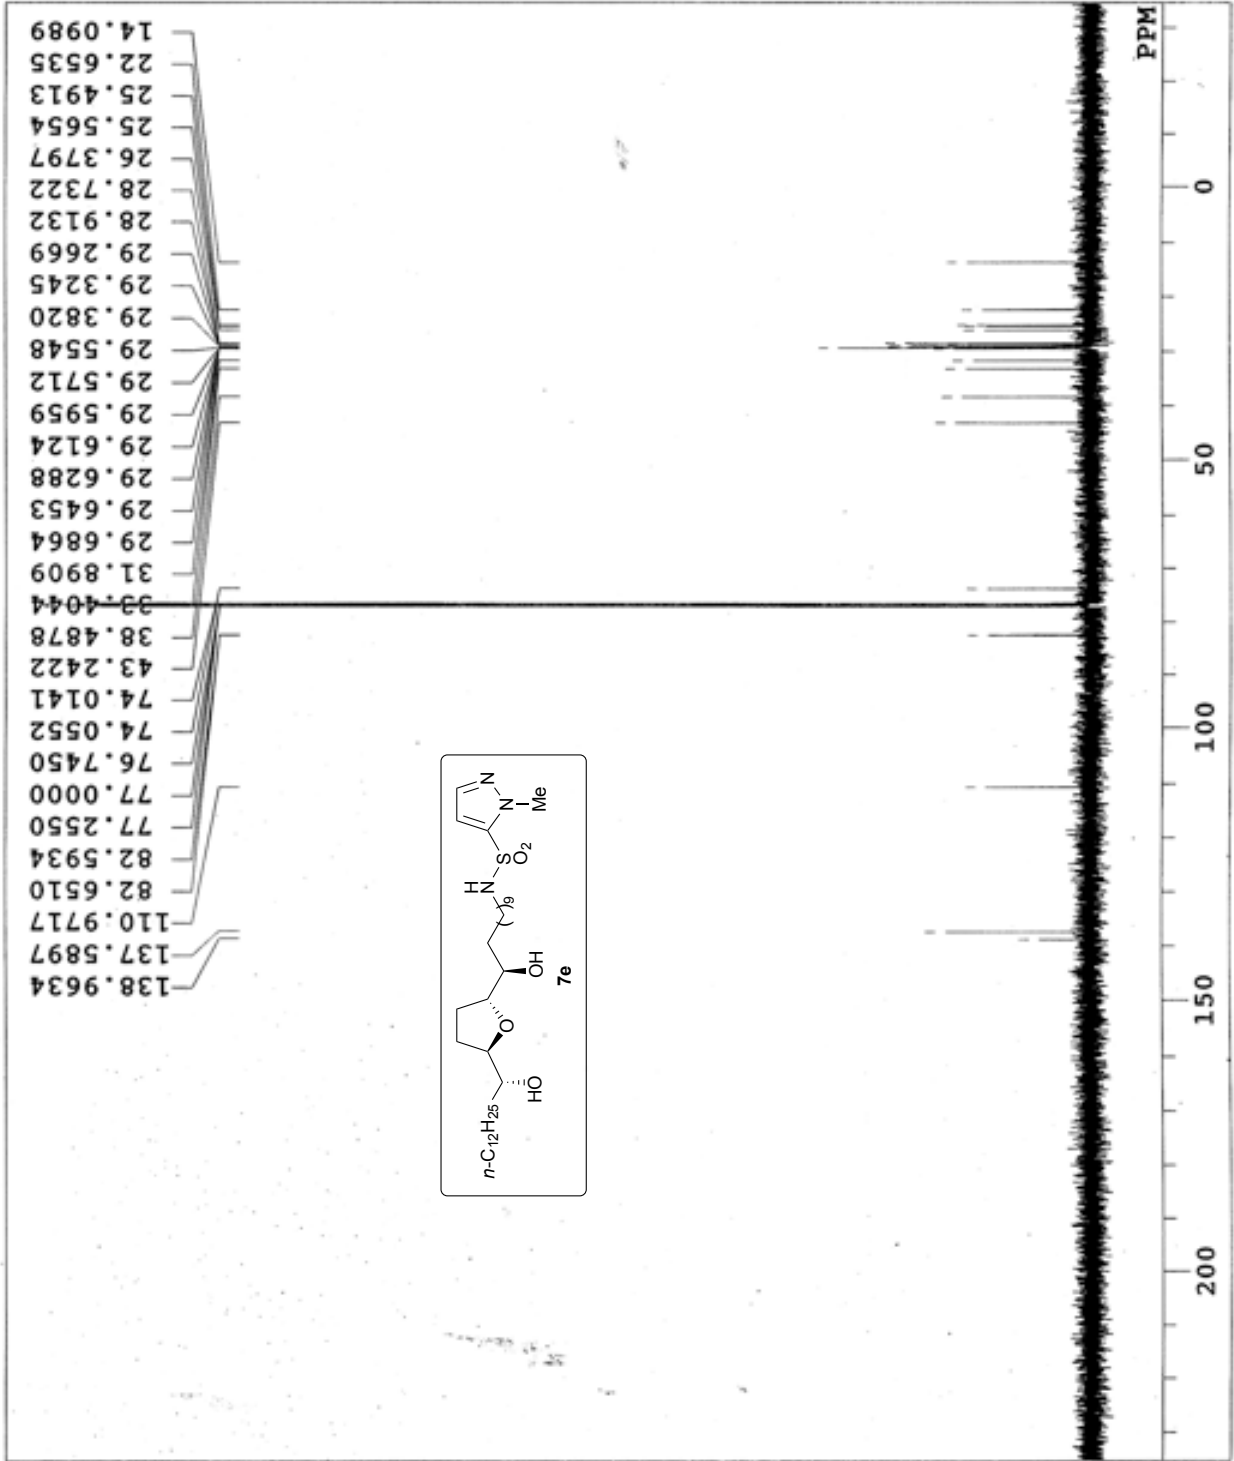

DFILE E:\500nmr\THF C1  
 COMNT 1215  
 DATIM Mon Dec 15 10:51  
 OBNUC 1H  
 EXMOD non  
 OBFRQ 500.00 MHz  
 OBSET 0.00 KHz  
 OBFIN 162160.00 Hz  
 POINT 8192  
 FREQU 10000.00 Hz  
 SCANS 16  
 ACQTM 0.8192 sec  
 PD 6.1808 sec  
 PW1 5.40 use  
 IRNUC 1H  
 CTEMP 22.2 C  
 SLVNT CDCL3  
 EXREF 0.00 ppm  
 BF 0.12 Hz  
 RGAIN 12

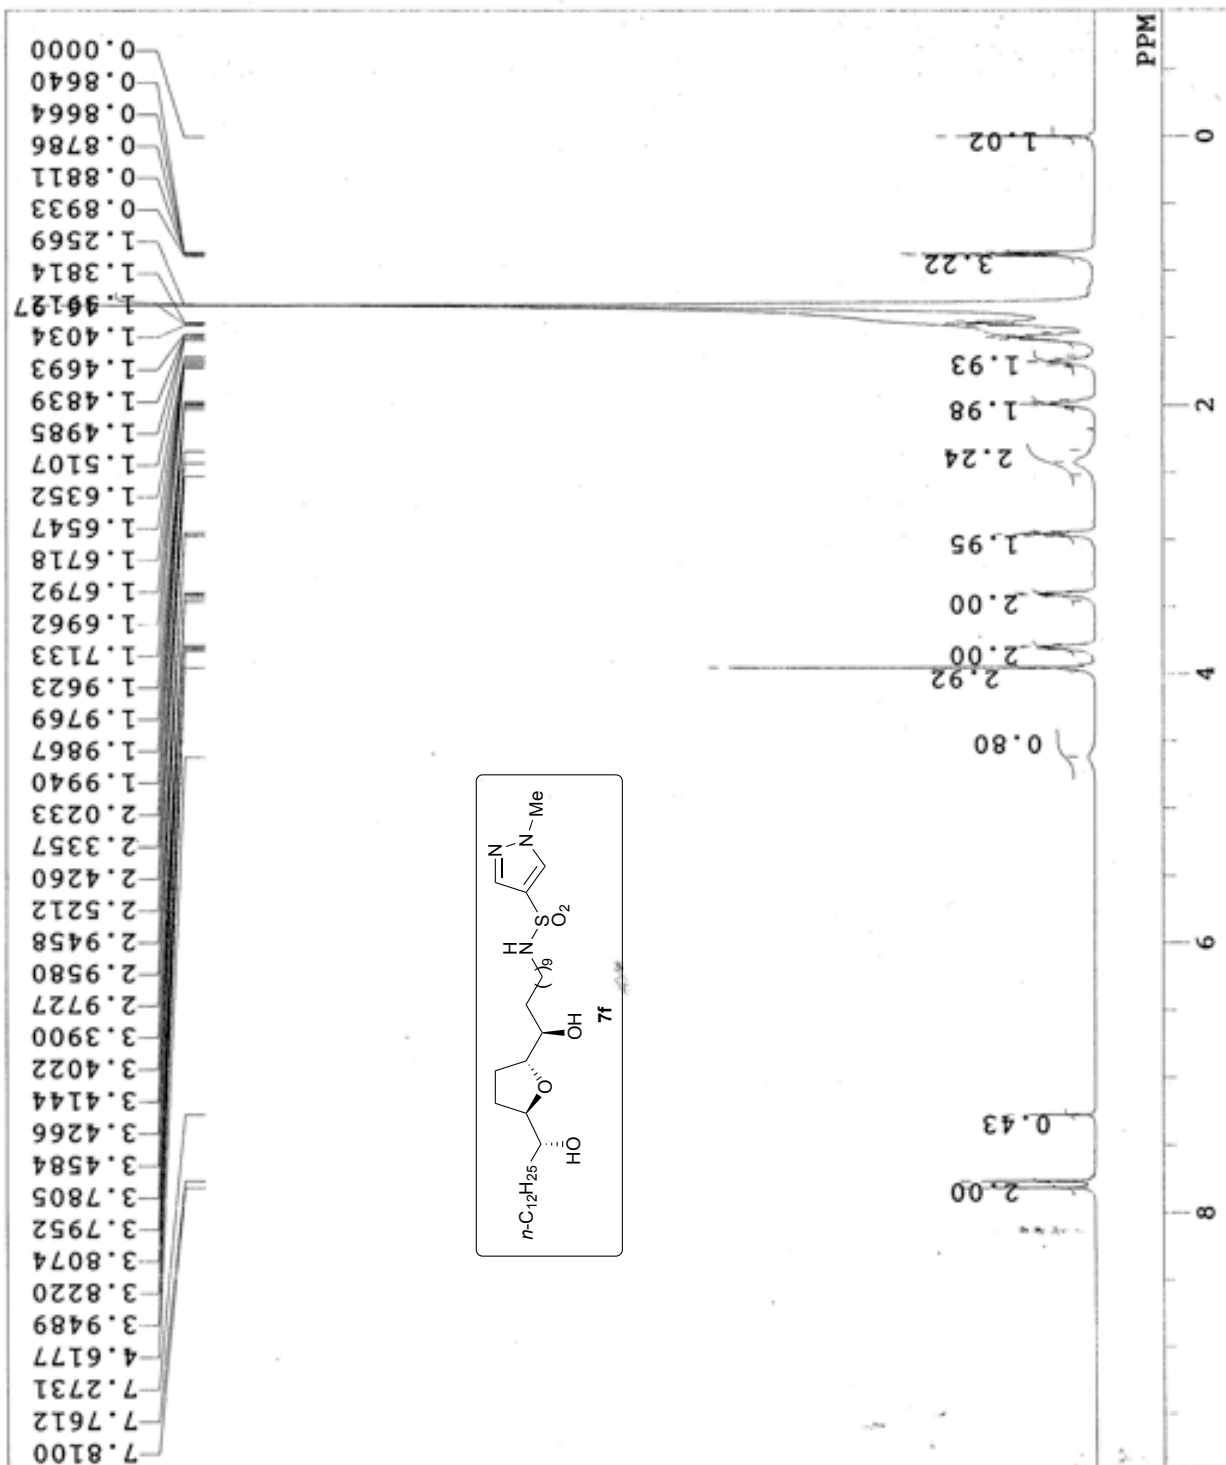

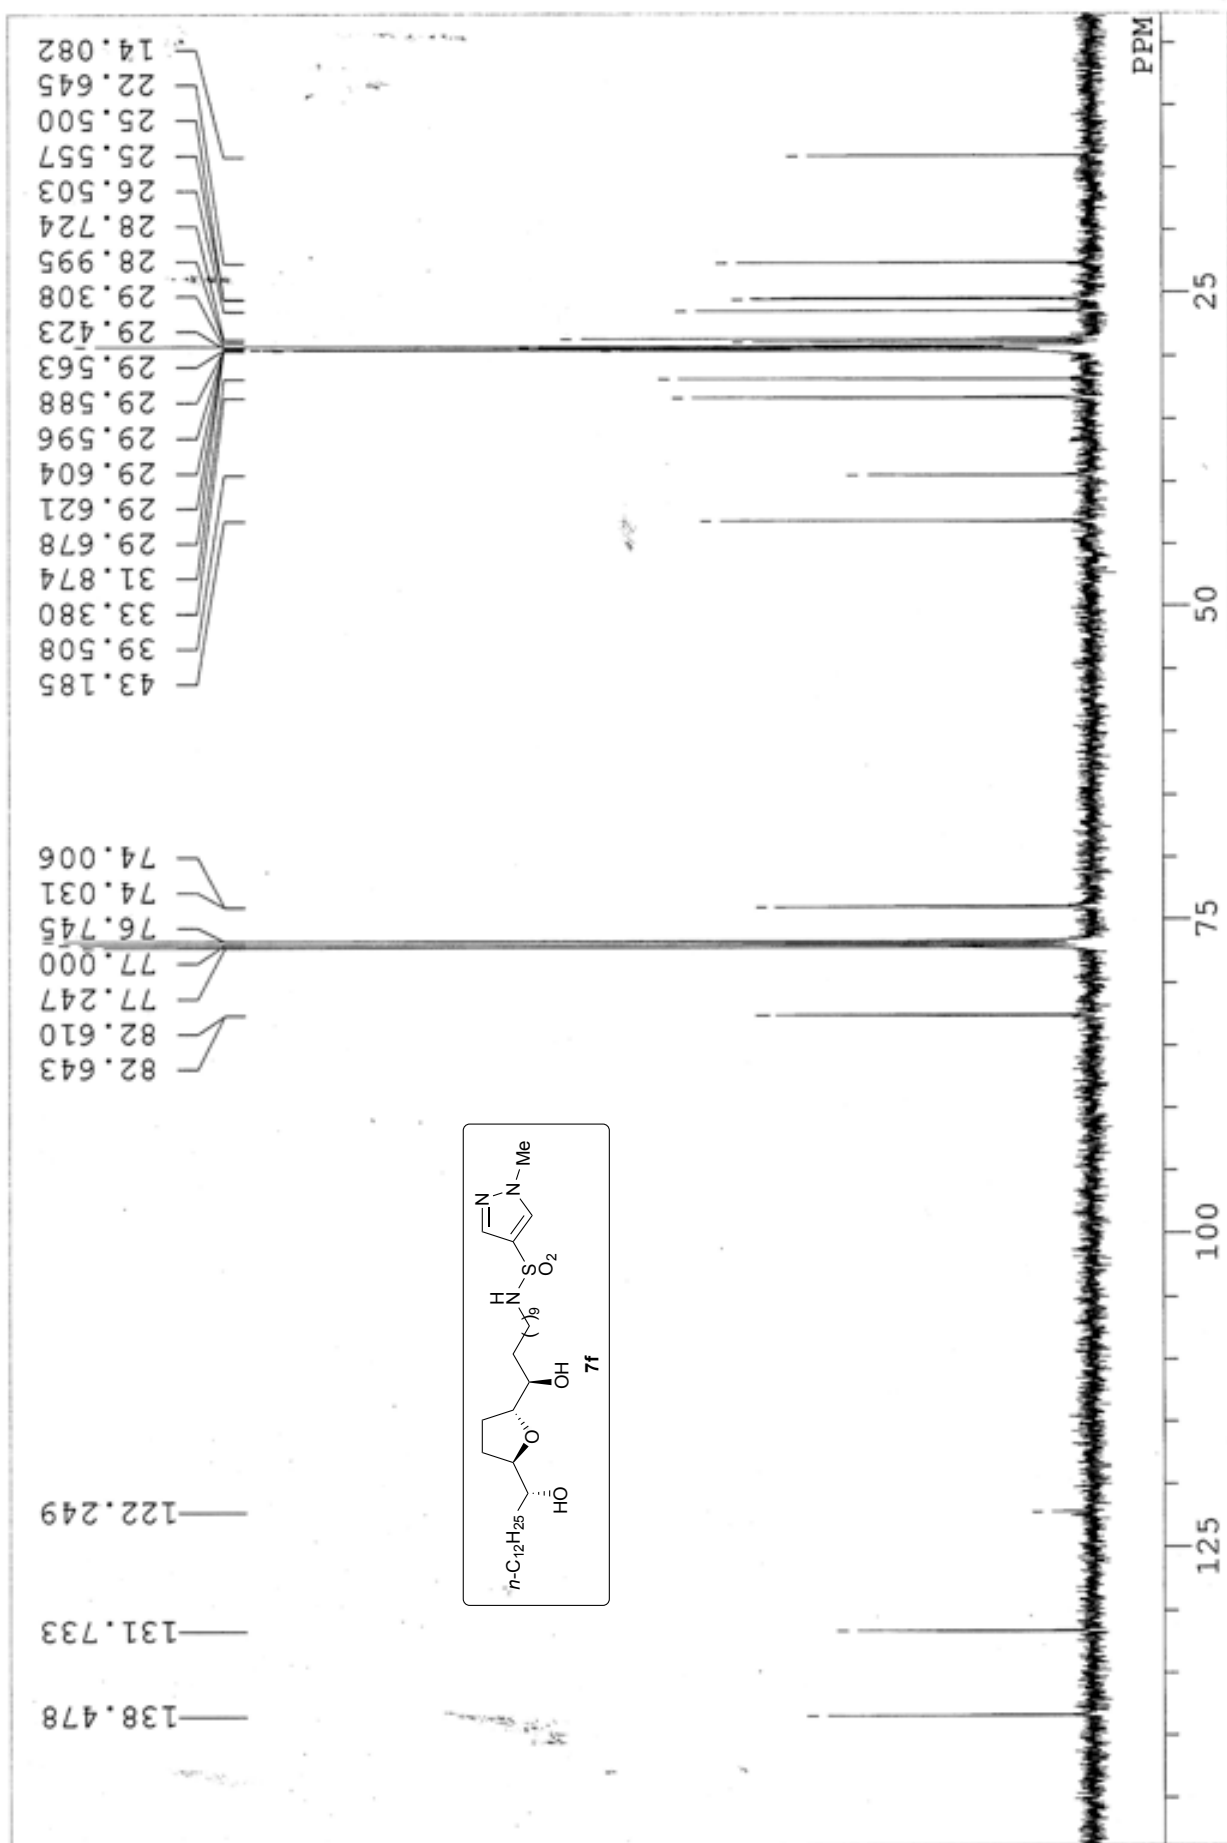



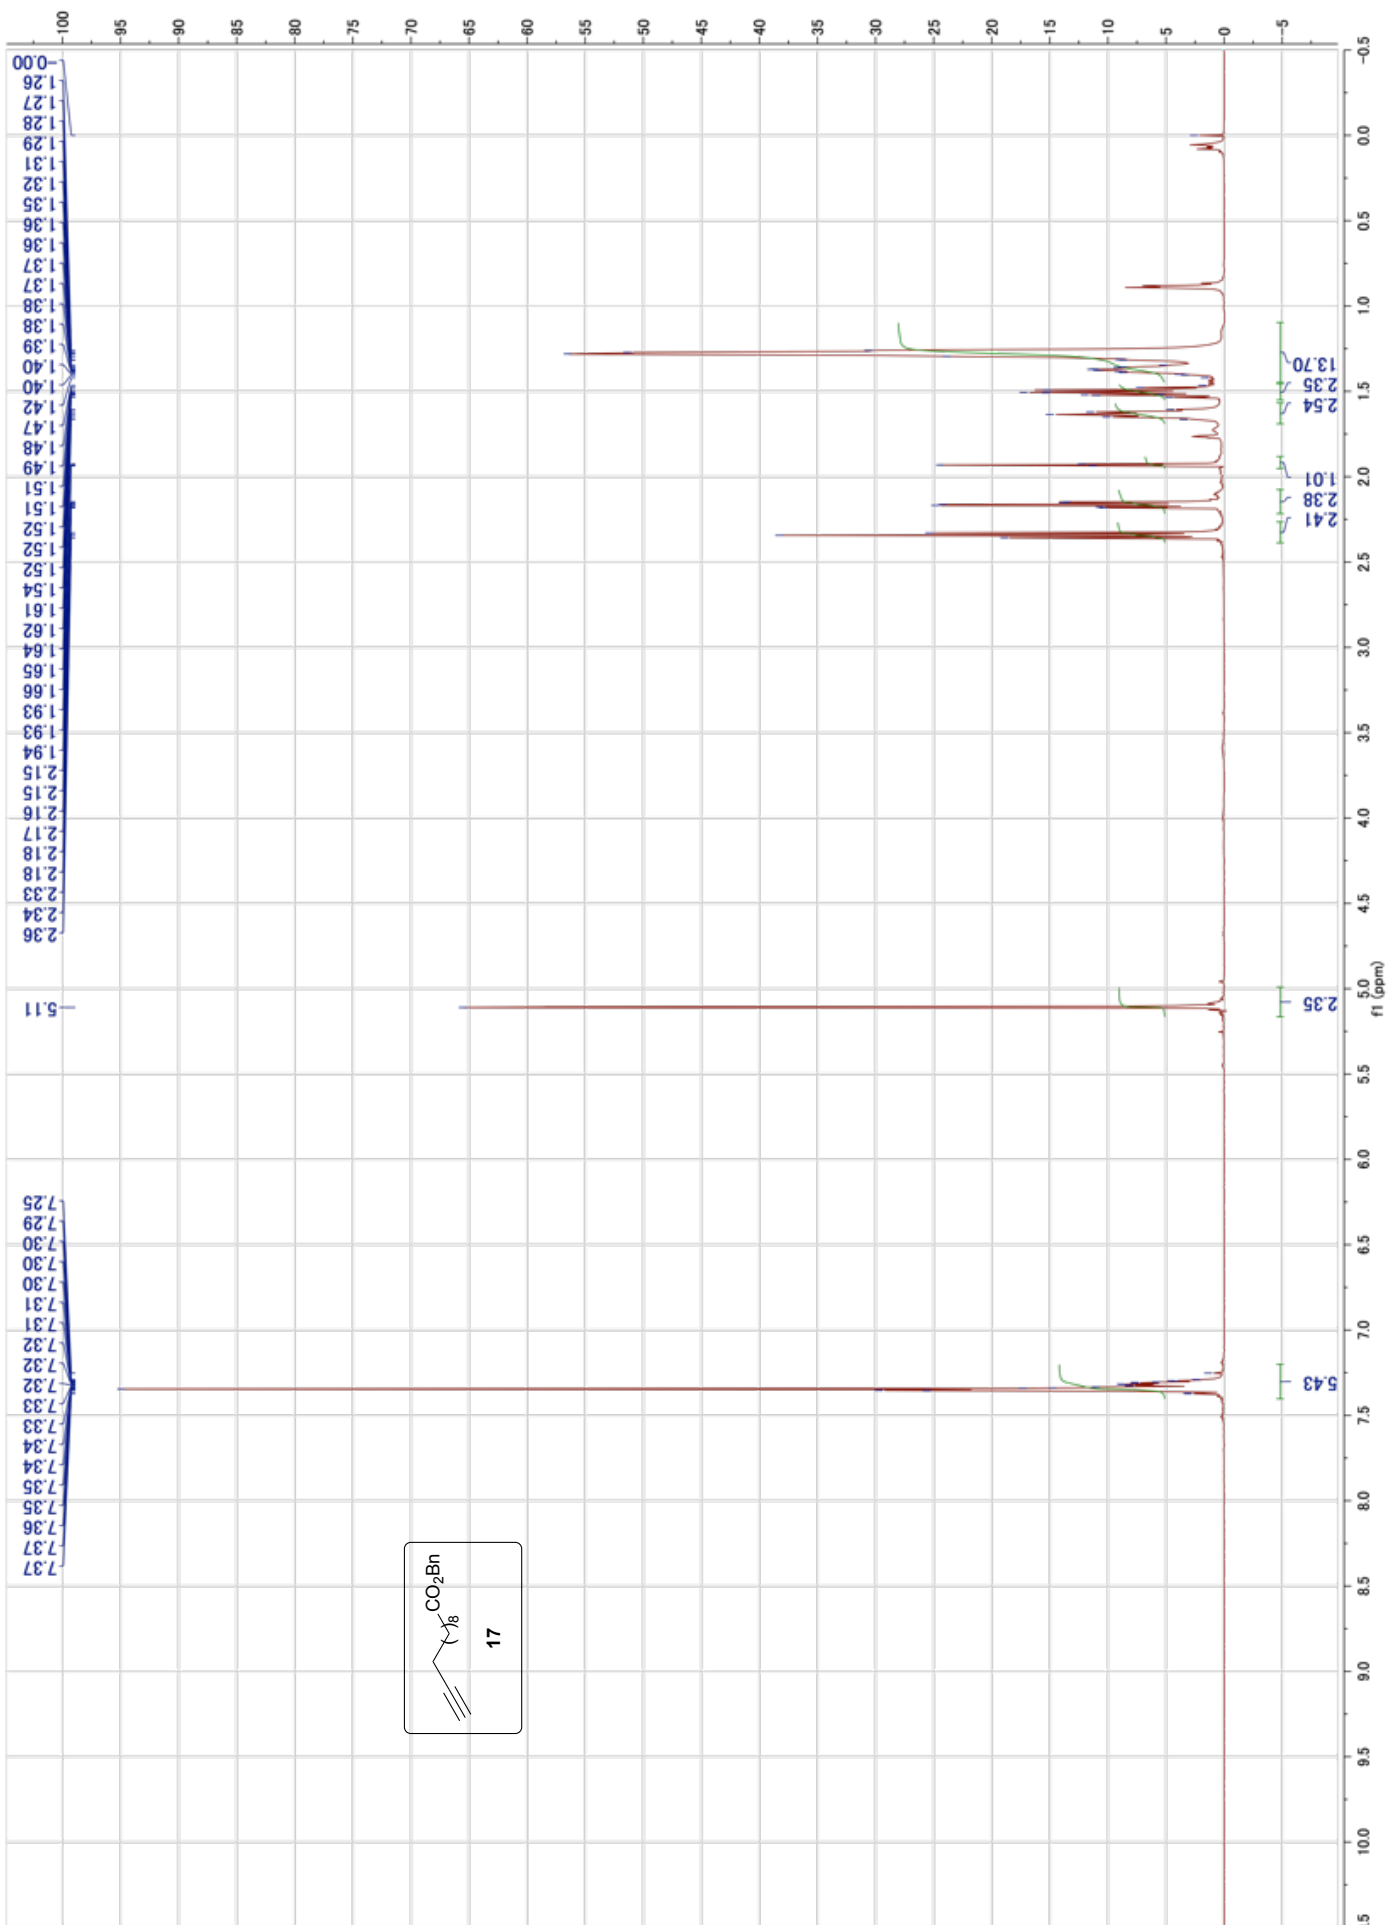

DFILE F:\,t,r,all@,foft  
 COMNT  
 DATIM Tue Oct 05 18:40  
 OBNUC 13C  
 EXMOD bcm  
 OBFRQ 125.65 MHz  
 OBSEF 0.00 KHz  
 OBFIN 127958.00 Hz  
 POINT 32768  
 FREQU 33898.30 Hz  
 SCANS 50  
 ACQTM 0.9667 sec  
 PD 2.0333 sec  
 PW1 5.00 use  
 IRNUC 1H  
 CTEMP 24.6 C  
 SLVNT CDCL3  
 EXREF 77.00 ppm  
 BF 1.20 Hz  
 RGAIN 25

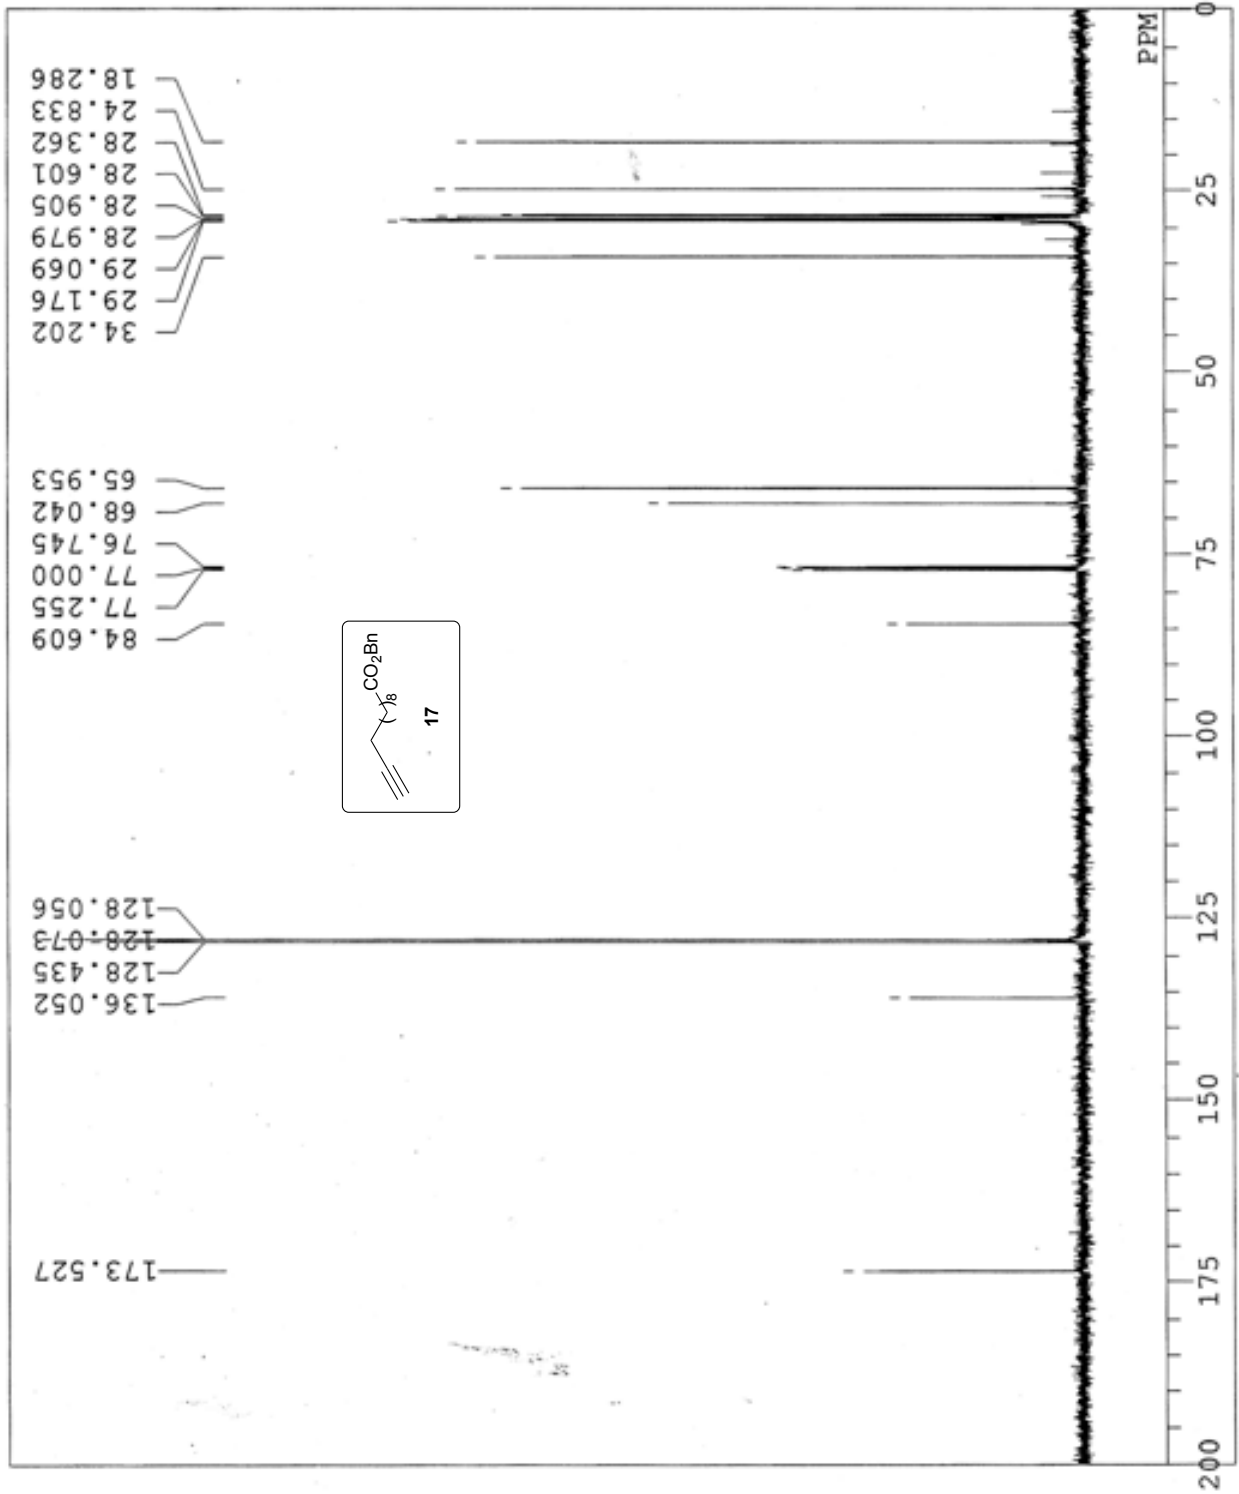

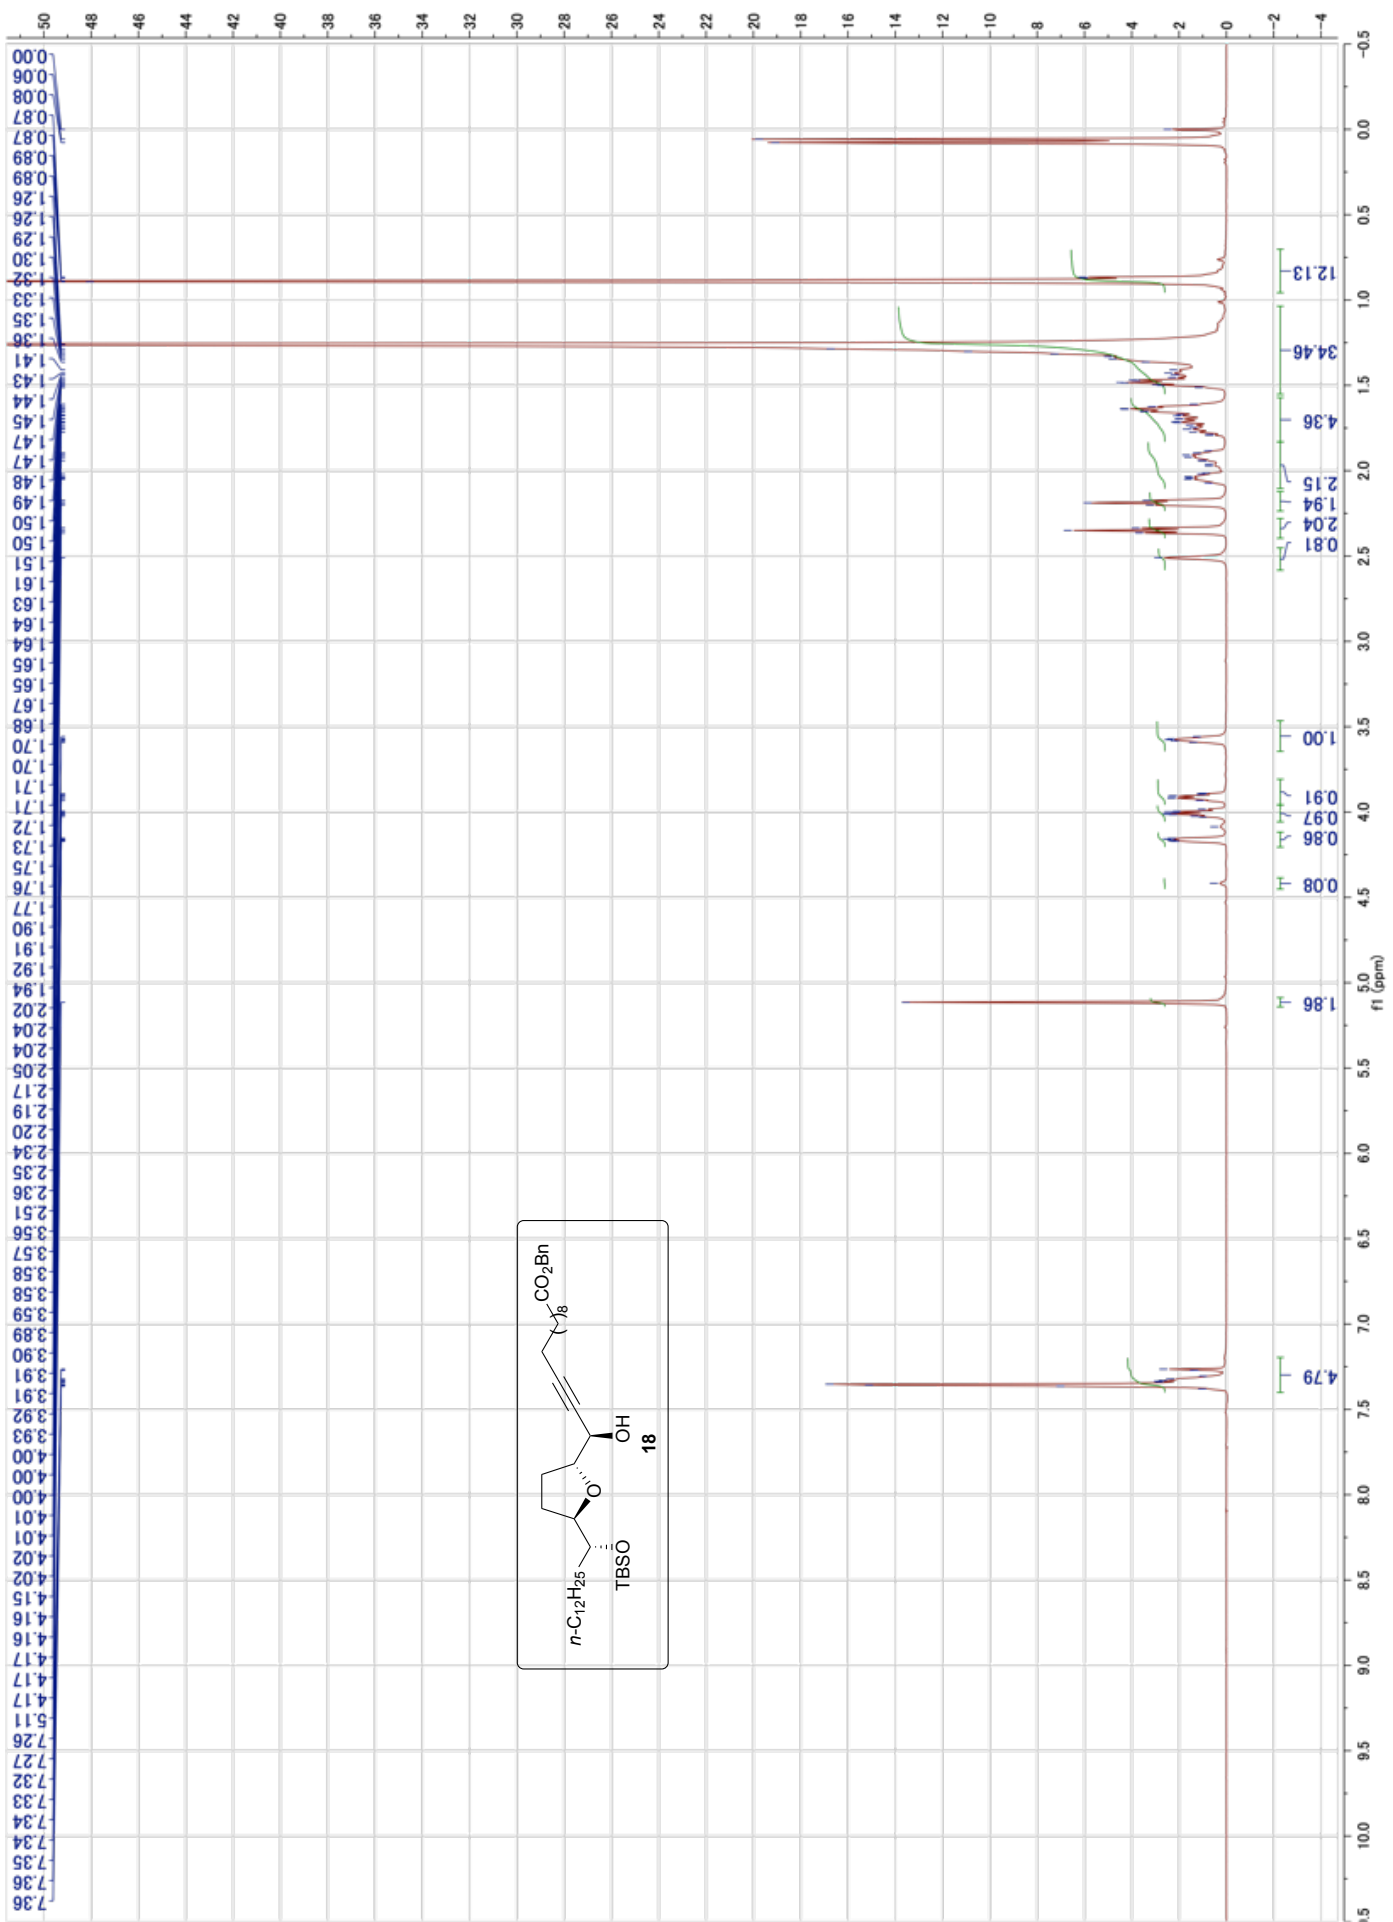

E:\TBS THF C11 C  
 DFILE 1027  
 COMNT Tue Oct 27 14:57  
 DATIM 13C  
 OBNUC bcm  
 EXMOD 125.65 MHz  
 OBFRQ 0.00 KHz  
 OBSET 127958.00 Hz  
 OBFIN 32768  
 POINT 33898.30 Hz  
 FREQU 550  
 SCANS 0.9667 sec  
 ACQTM 2.0333 sec  
 PD 5.00 use  
 PW1  
 IRNUC 1H  
 CTEMP 25.6 c  
 SLVNT CDCL3  
 EXREF 77.00 ppm  
 BF 1.20 Hz  
 RGAIN 26

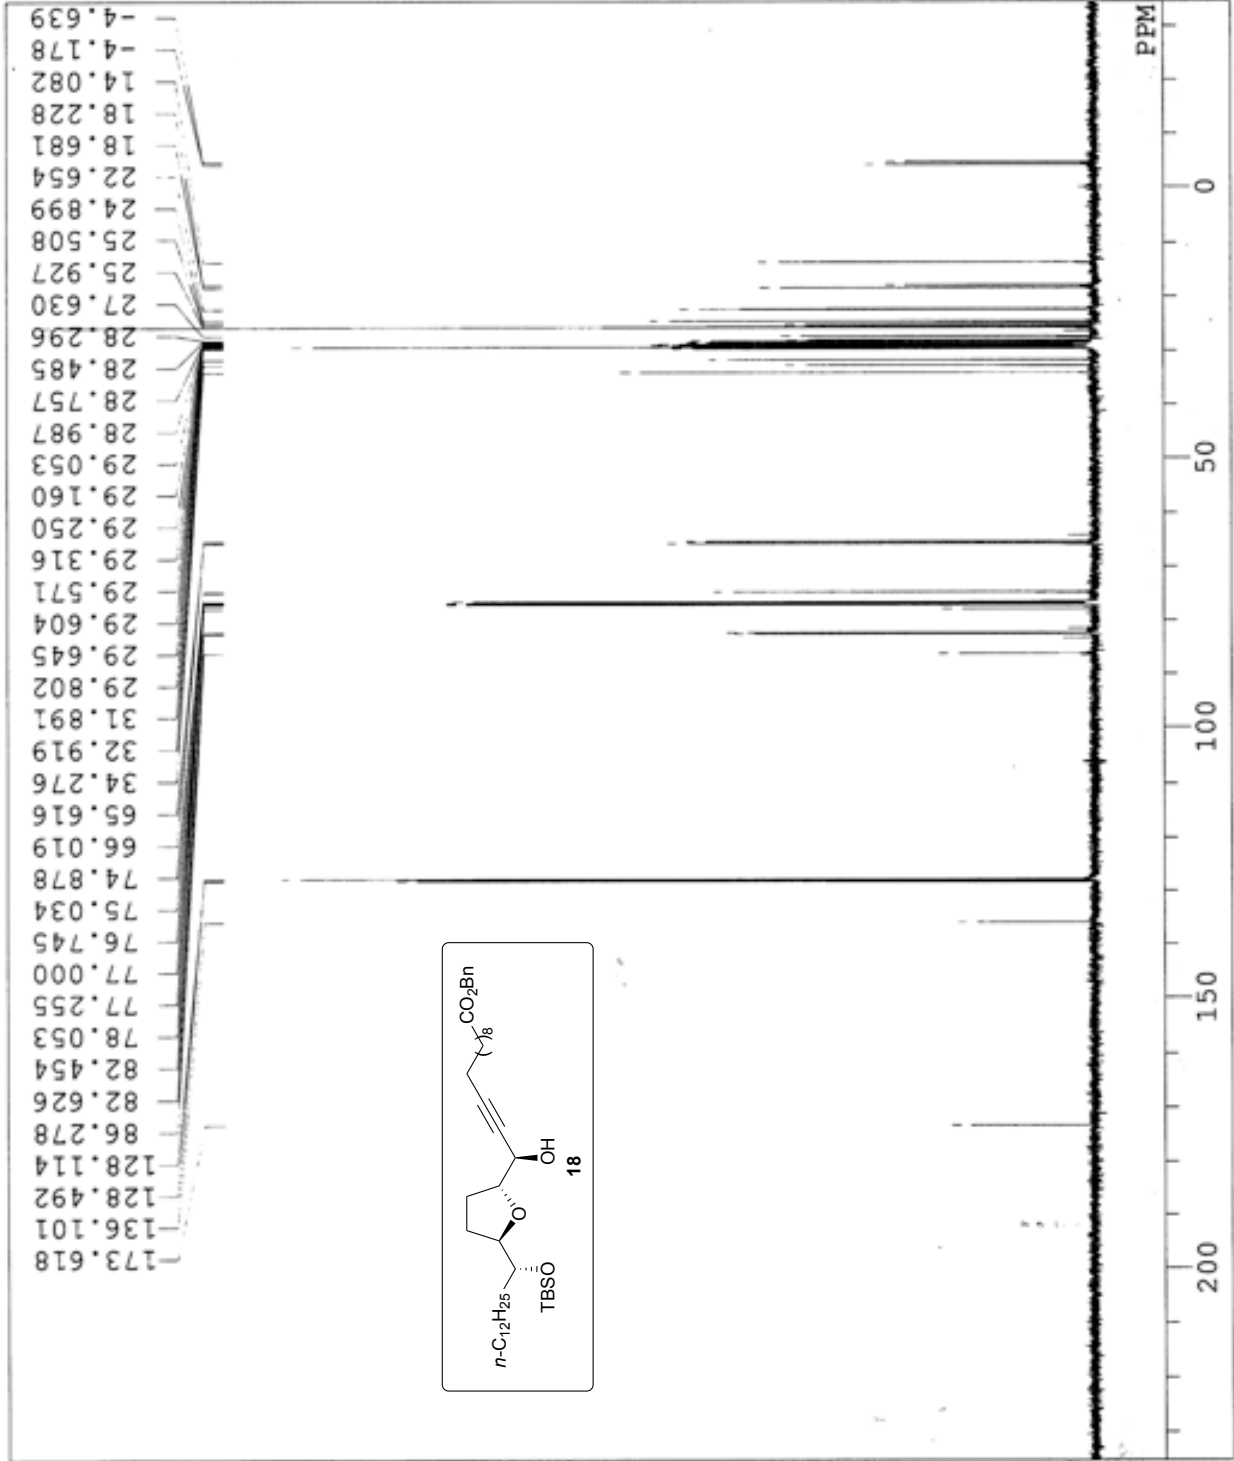

DFILE F:\0414\TBS THF  
 COMNT  
 DATIM Mon Aug 23 17:56  
 OBNUC 1H  
 EXMOD non  
 OBFRQ 500.00 MHz  
 OBSET 0.00 KHz  
 OBFIN 162160.00 Hz  
 POINT 16384  
 FREQU 10000.00 Hz  
 SCANS 32  
 ACQTM 1.6384 sec  
 PD 5.3616 sec  
 PW1 5.70 use  
 IRNUC 1H  
 CTEMP 24.9 C  
 SLVNT CDCL3  
 EXREF 0.00 ppm  
 BF 0.12 Hz  
 RGAIN 12

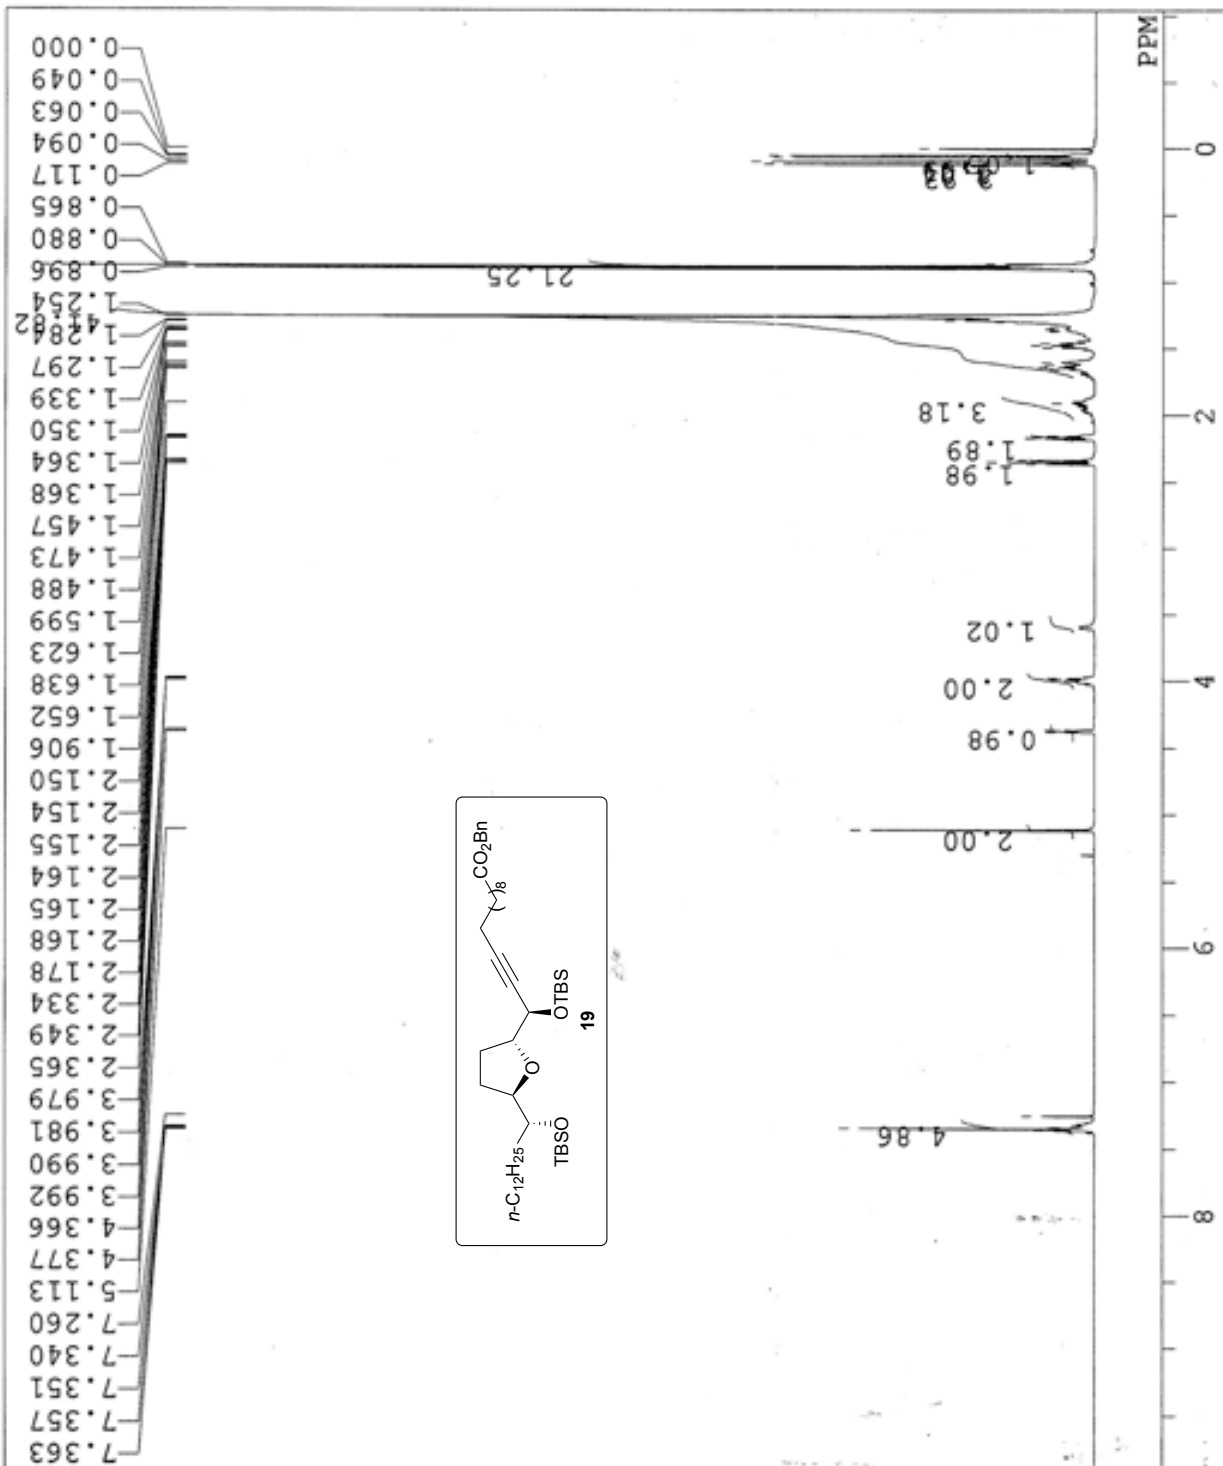

E:\TBS THF TBS a  
 DFILE 20100129  
 COMNT Sat Jan 30 02:02  
 DATIM 13C  
 OBNUC BCM  
 EXMOD  
 OBFRO 75.45 MHz  
 OBSEL 124.00 KHz  
 OBFIN 1840.00 Hz  
 POINT 32768  
 FREQU 20356.23 Hz  
 SCANS 2000  
 ACQTM 1.6097 sec  
 PD 1.3900 sec  
 PW1 4.60 use  
 IRNUC 1H  
 CTEMP 20.2 C  
 SLVNT CDCL3  
 EXREF 77.00 ppm  
 BF 1.20 Hz  
 RGAIN 24

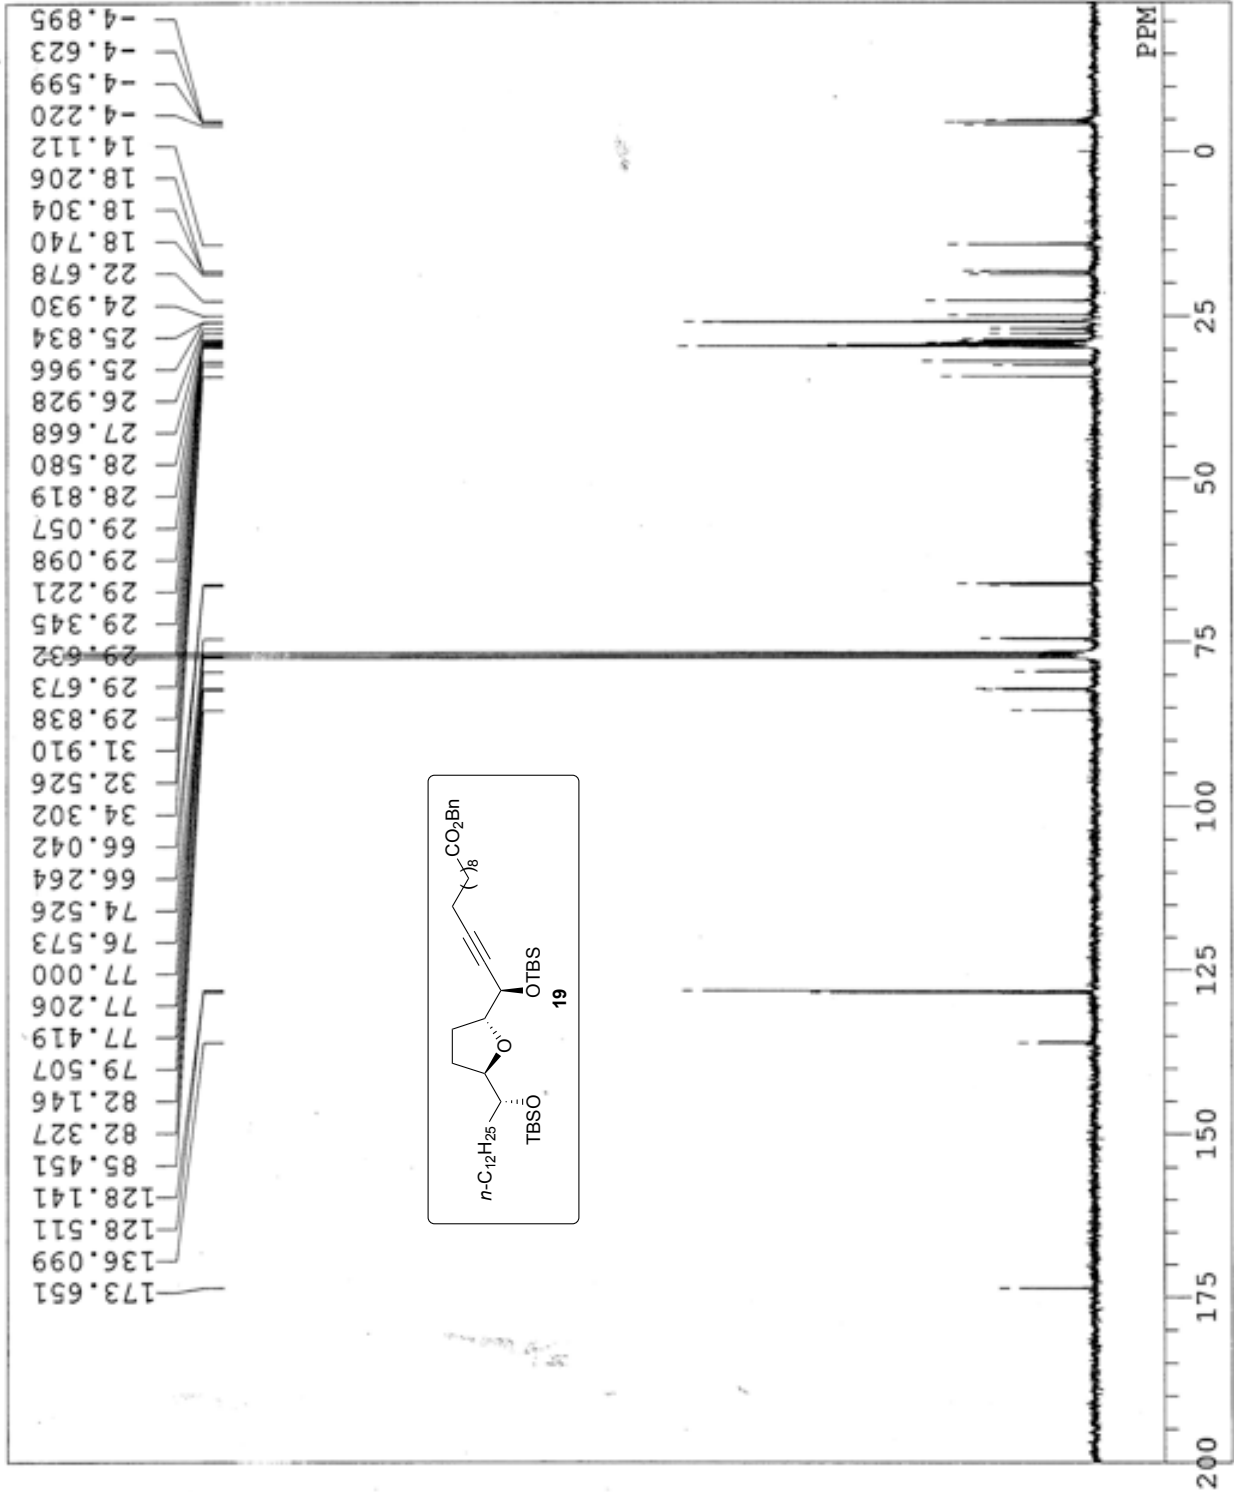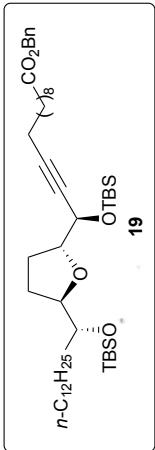

DFILE E:\t,r,alle\foft  
 COMNT 20091014  
 DATIM Wed Oct 14 19:41  
 OBNUC 1H  
 EXMOD non  
 OBFRQ 500.00 MHz  
 OBSET 0.00 KHz  
 OBFIN 162160.00 Hz  
 POINT 8192  
 FREQU 10000.00 Hz  
 SCANS 24  
 ACQTM 0.8192 sec  
 PD 6.1808 sec  
 PW1 5.70 use  
 IRNUC 1H  
 CTEMP 23.5 C  
 SLVNT CDCL3  
 EXREF 0.00 ppm  
 BF 0.12 Hz  
 RGAIN 8

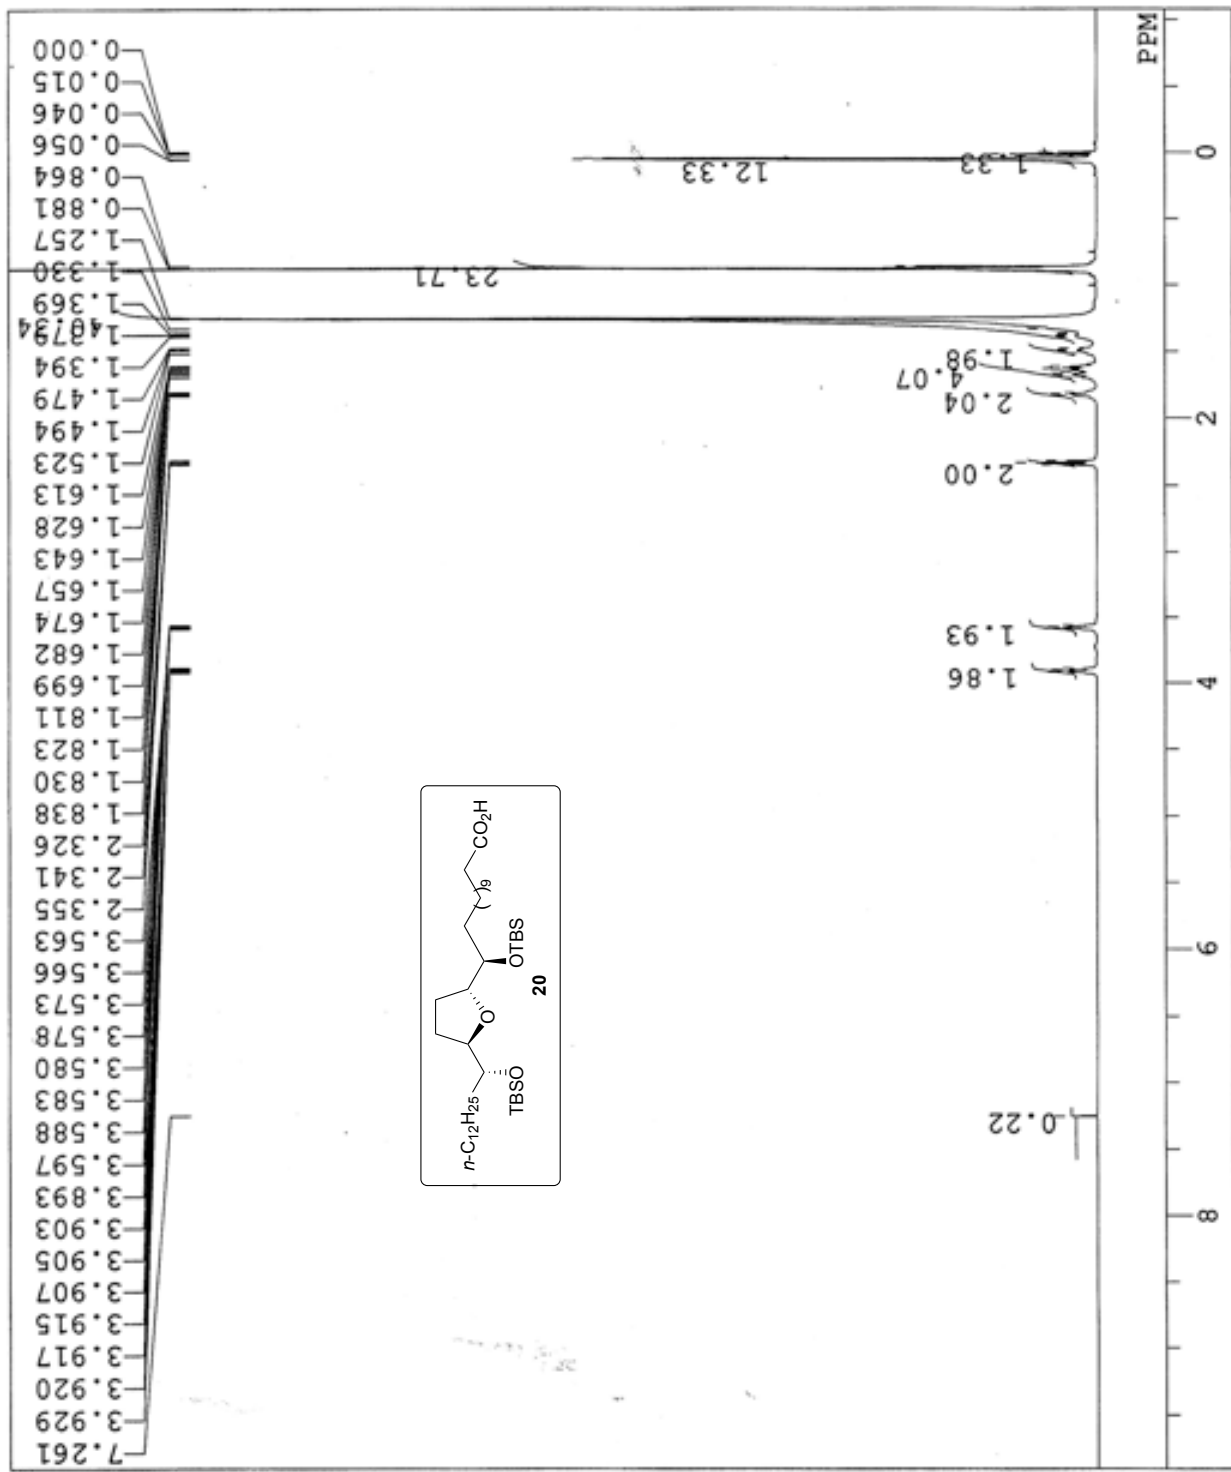

E:\t,r,a\@''\_fofi  
 20091014  
 Wed Oct 14 20:28  
 13C  
 bcm  
 125.65 MHz  
 0.00 KHz  
 127958.00 Hz  
 32768  
 33898.30 Hz  
 500  
 0.9667 sec  
 2.0333 sec  
 5.00 use  
 1H  
 25.7 C  
 CDCL3  
 77.00 ppm  
 1.20 Hz  
 25

DFILE  
 COMNT  
 DATIM  
 OBNUC  
 EXMOD  
 OBFRO  
 OBSET  
 OBFIN  
 POINT  
 FREQU  
 SCANS  
 ACQTM  
 PD  
 PW1  
 IRNUC  
 CTEMP  
 SLVNT  
 EXREF  
 BF  
 RGAIN

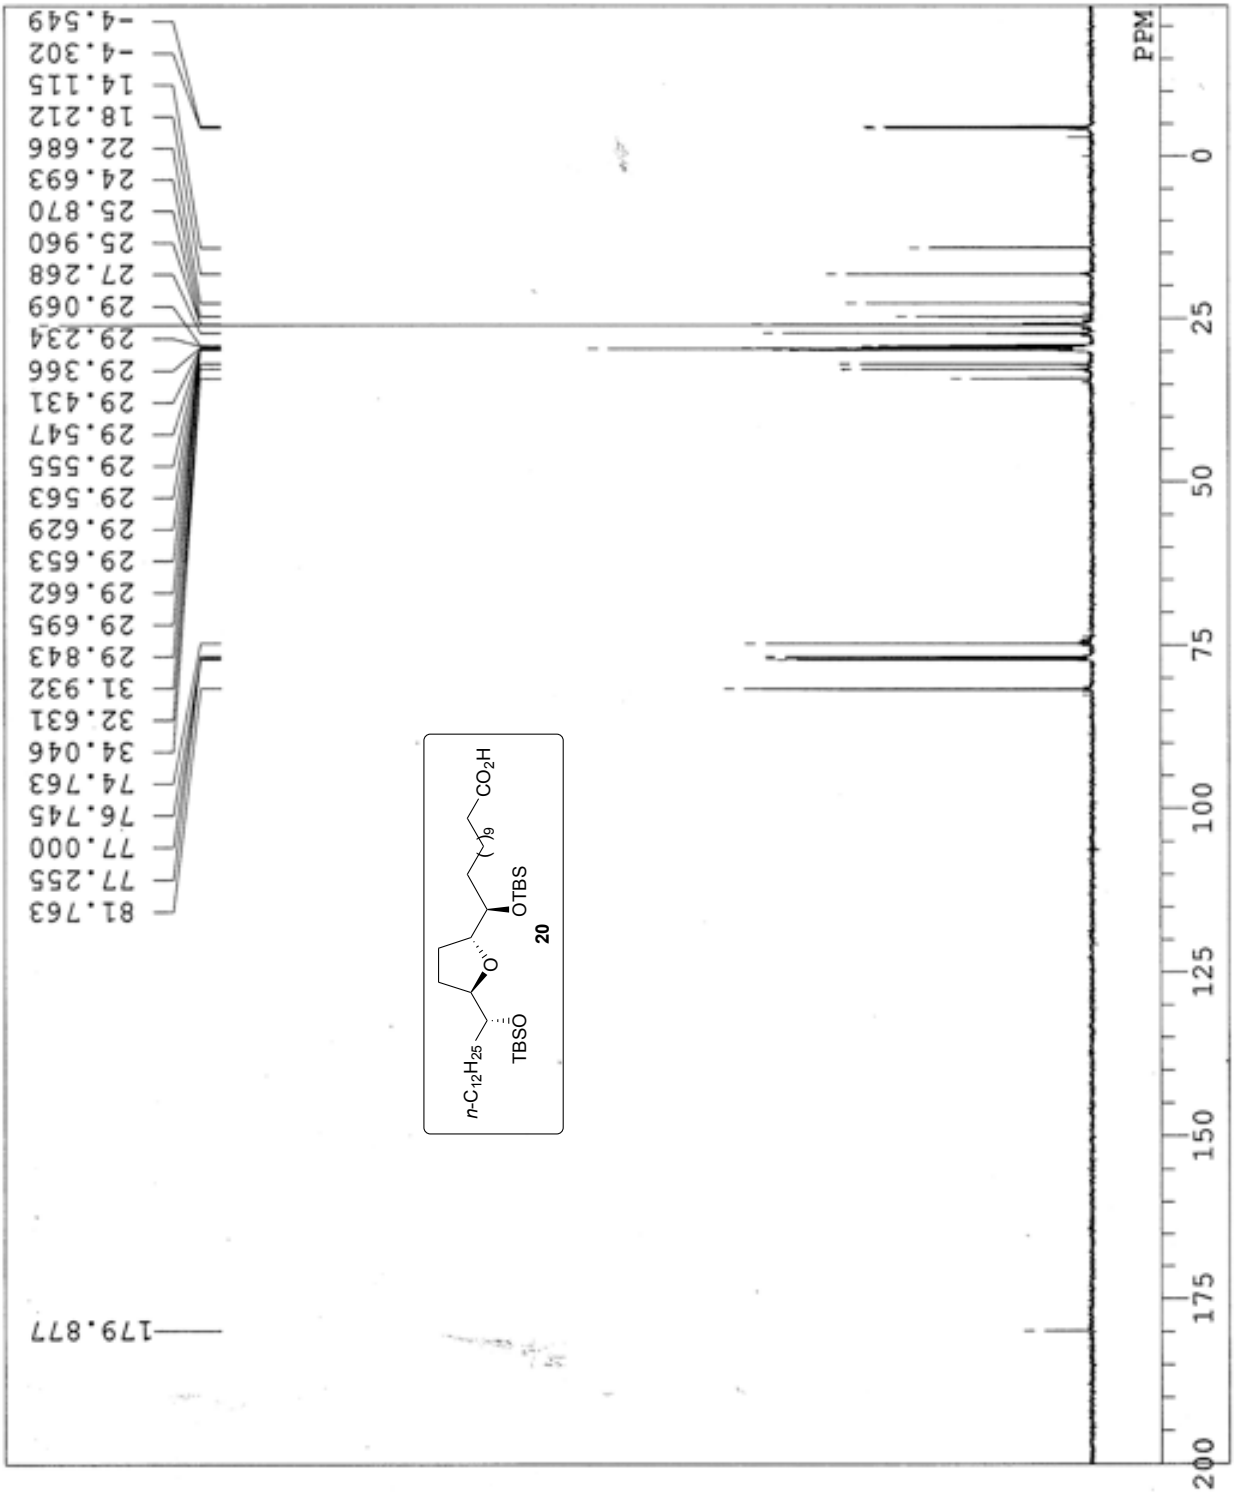



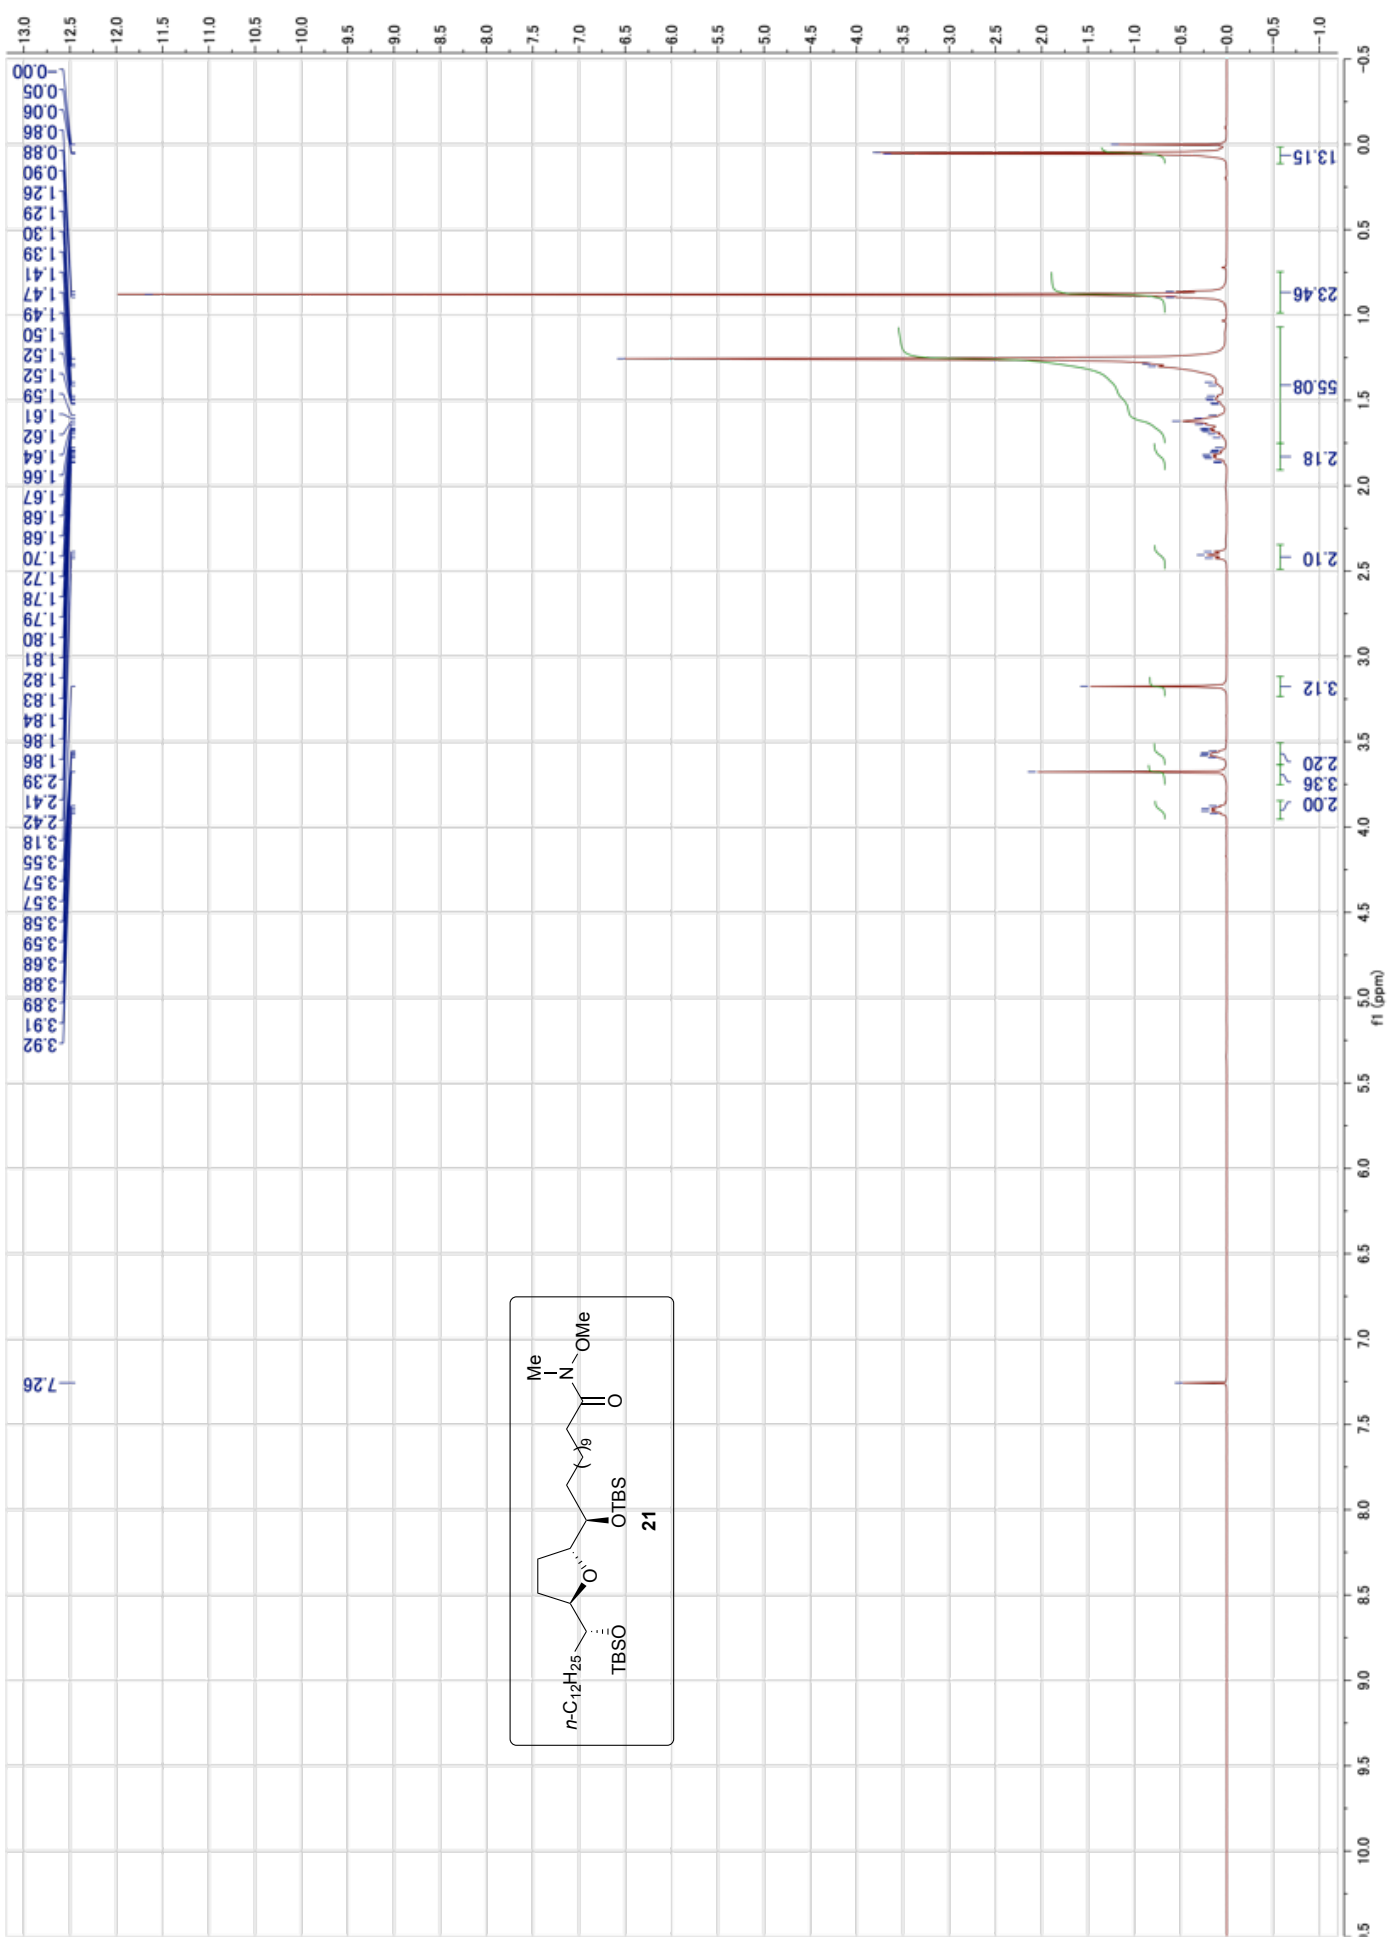

DFILE E:\TBS THFTBS C1  
 COMNT 0123  
 DATIM Sat Jan 23 03:30  
 OBNUC 13C  
 EXMOD BCM  
 OBFRO 75.45 MHz  
 OBSET 124.00 KHz  
 OBFIM 1840.00 Hz  
 POINT 32768  
 FREQU 20356.23 Hz  
 SCANS 4000  
 ACQTM 1.6097 sec  
 PD 1.3900 sec  
 PW1 4.60 use  
 IRNUC 1H  
 CTEMP 20.2 c  
 SLVNT CDCL3  
 EXREF 77.00 ppm  
 BF 1.20 Hz  
 RGAIN 24

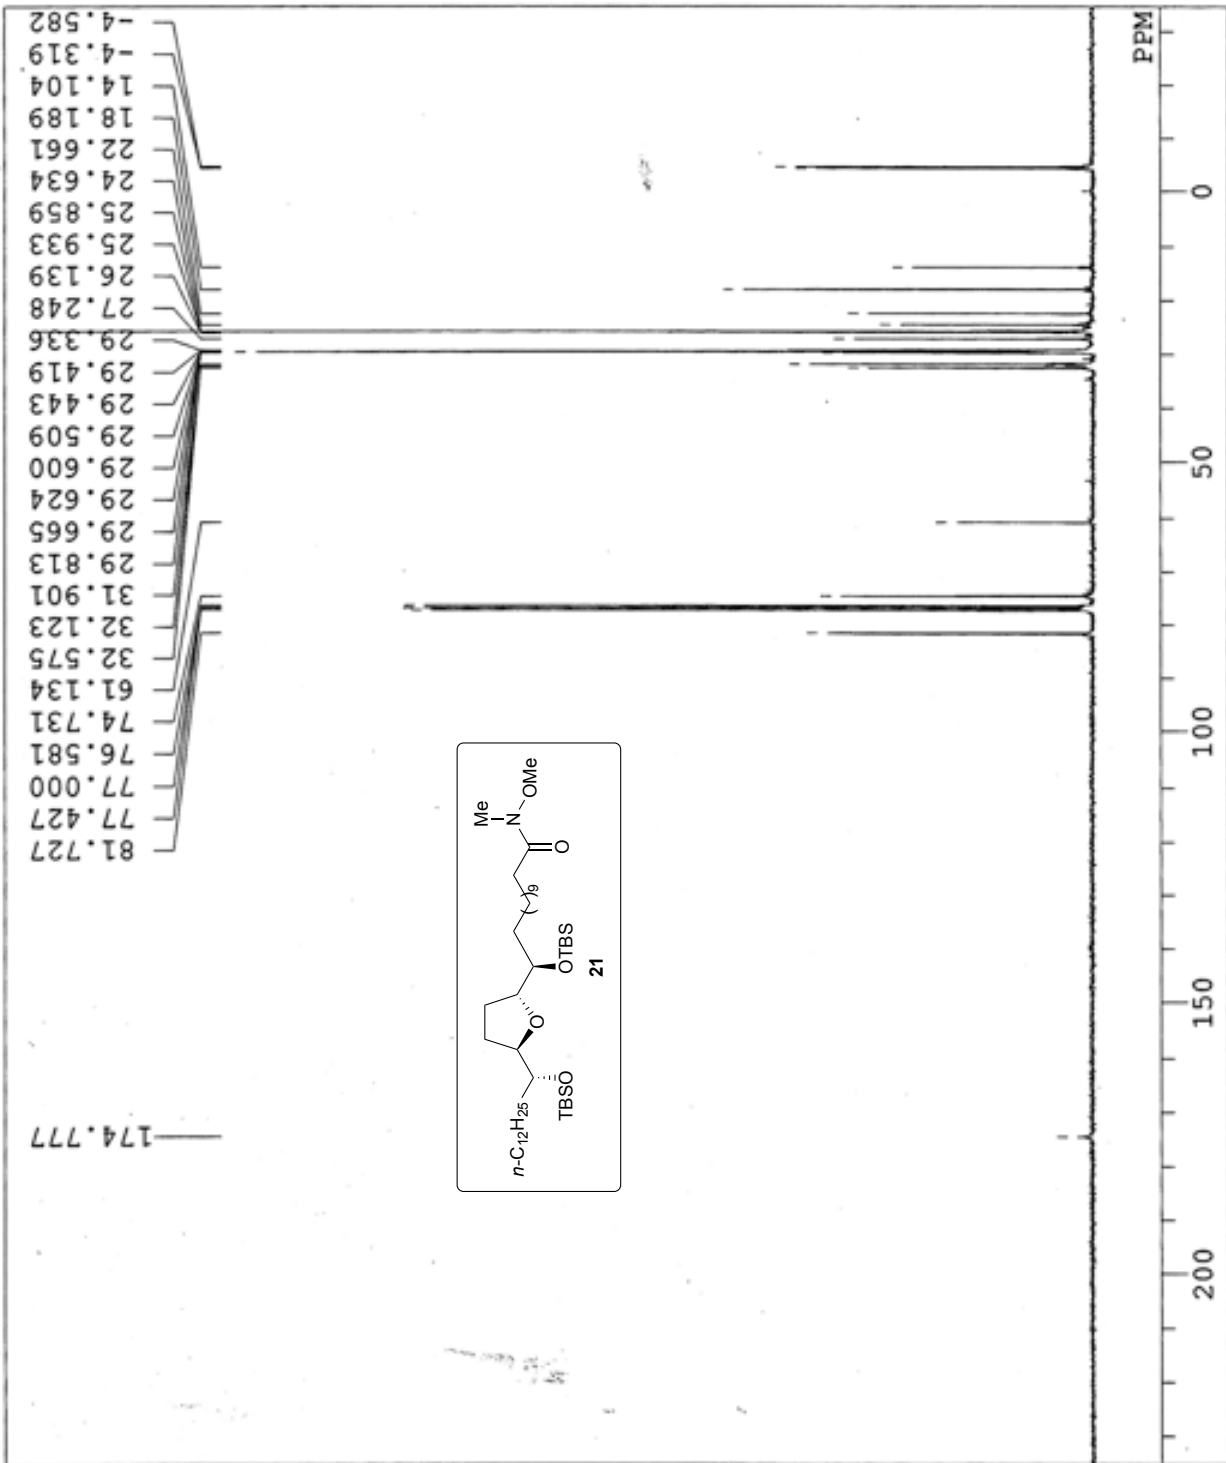

E:\,t,r,a\@'\,foft  
 single\_pulse  
 05-10-2009 17:05  
 1H  
 single\_pulse.ex2  
 399.78 MHz  
 4.19 KHz  
 7.29 Hz  
 13107  
 6002.31 Hz  
 16  
 2.1837 sec  
 2.0000 sec  
 5.35 use  
 1H  
 21.0 C  
 0.00 ppm  
 0.12 Hz  
 36  
 CDCL3

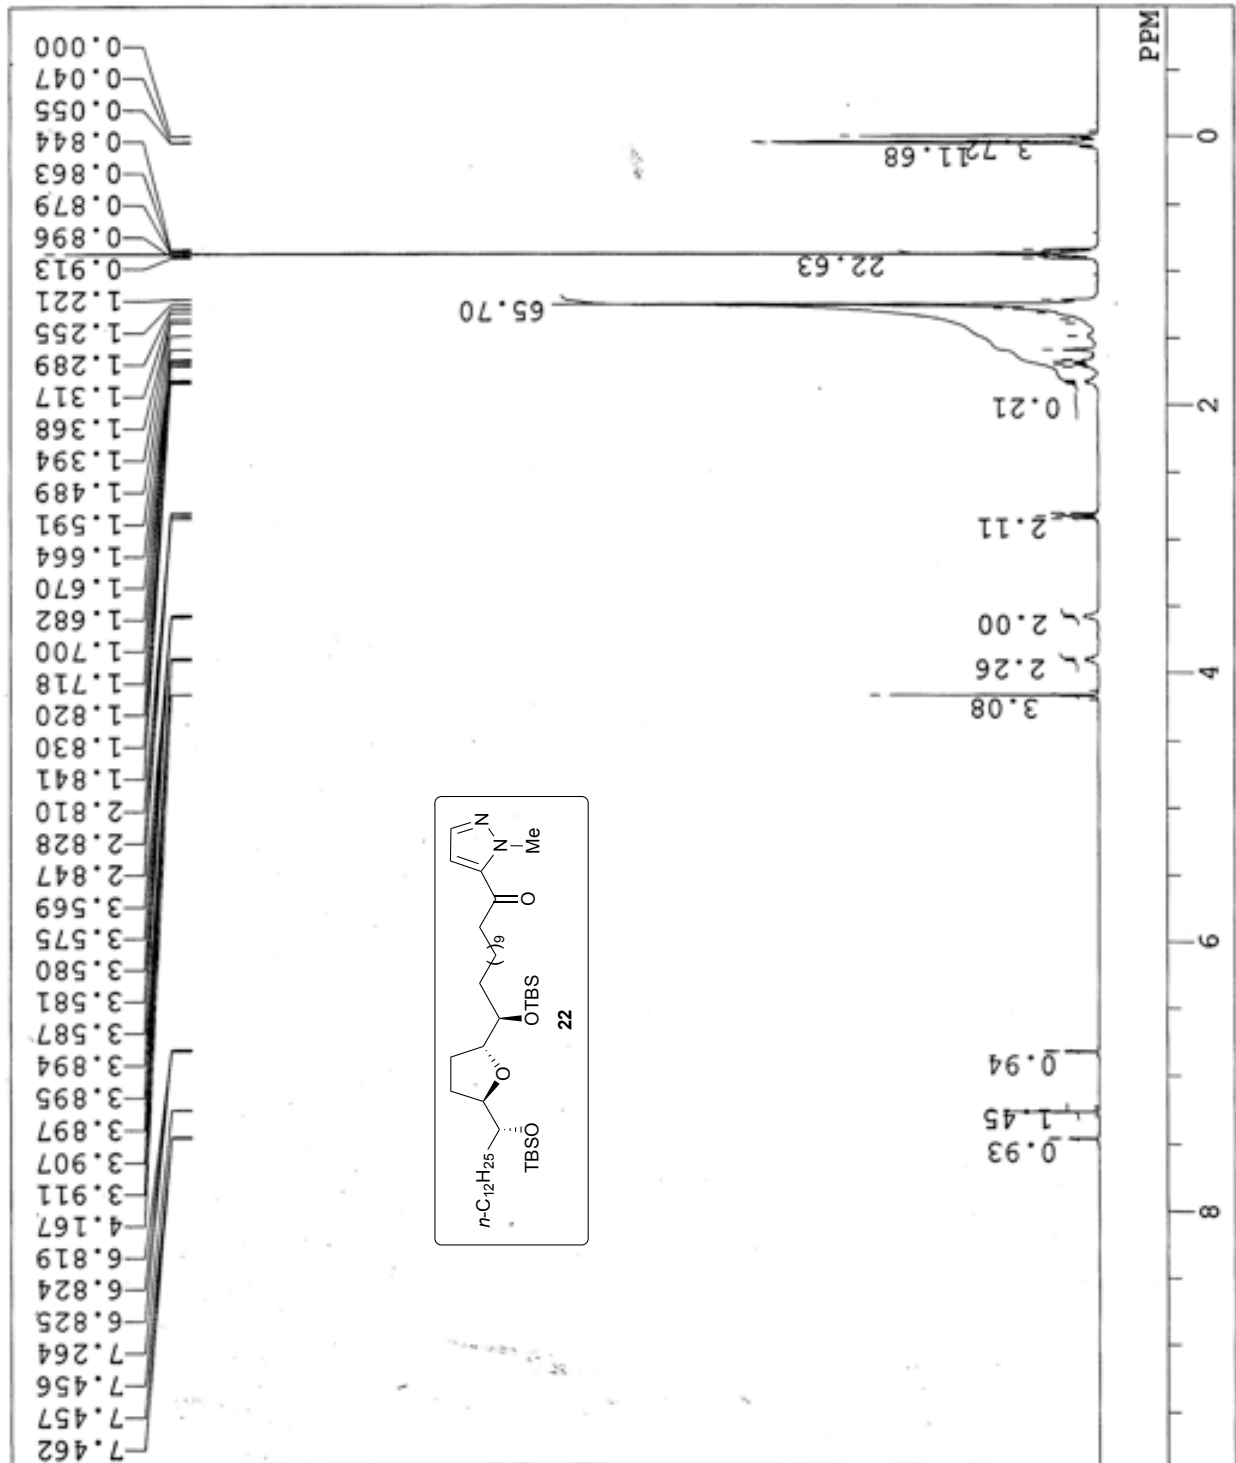

DFILE E:\t,r,a\@''foft  
 COMNT 1019-2  
 DATIM Mon Oct 19 19:17  
 OBNUC 13C  
 EXMOD bcm  
 OBFRQ 125.65 MHz  
 OBSET 0.00 KHz  
 OBFIN 127958.00 Hz  
 POINT 32768  
 FREQU 33898.30 Hz  
 SCANS 600  
 ACQTM 0.9667 sec  
 PD 2.0333 sec  
 PW1 5.00 use  
 IRNUC 1H  
 CTEMP 26.2 C  
 SLVNT CDCL3  
 EXREF 77.00 ppm  
 BF 1.20 Hz  
 RGAIN 26

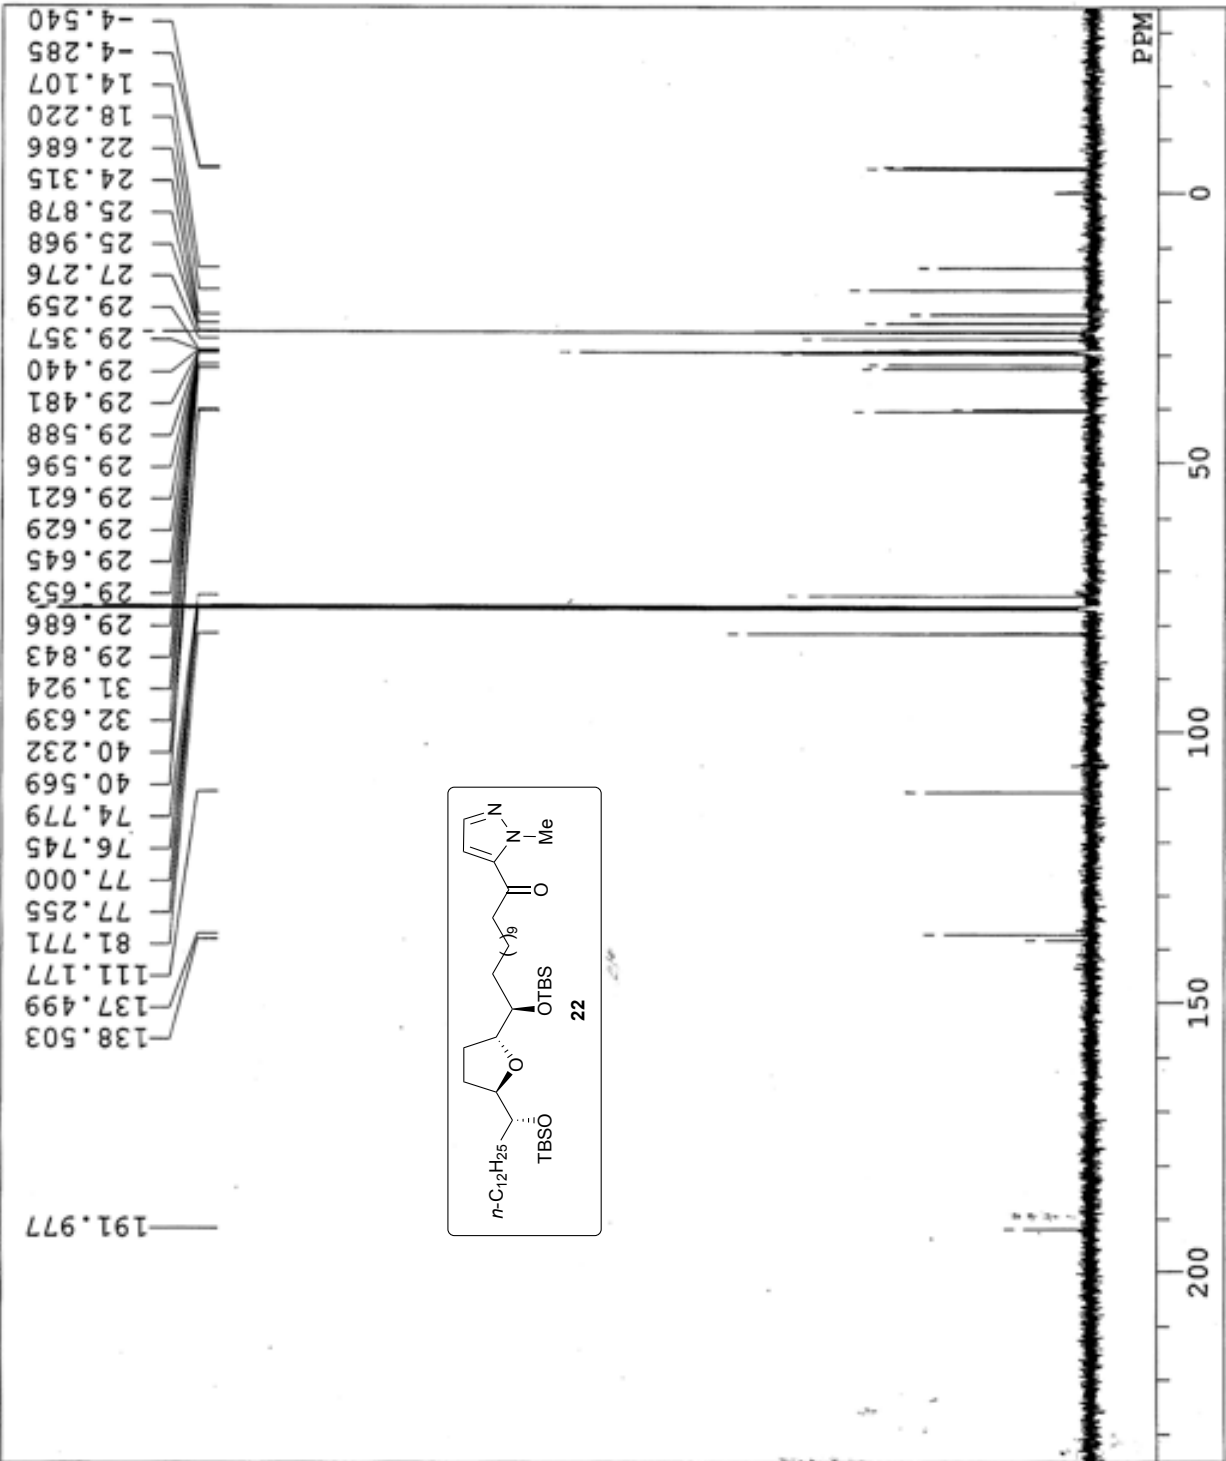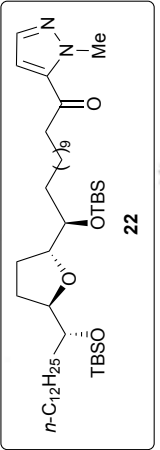

E:\0414\C12 OH T  
 DFILE 0716  
 COMNT 17-07-2010 00:02  
 DATIM 1H  
 OBNUC single\_pulse.ex2  
 EXMOD 399.78 MHz  
 OBFRQ 4.19 KHz  
 OBSET 7.29 Hz  
 OBFIN 13107  
 POINT 6002.31 Hz  
 FREQU 16  
 SCANS 2.1837 sec  
 ACQTM 4.0000 sec  
 PD 5.35 use  
 PW1 1H  
 IRNUC 23.6 C  
 CTEMP CDCL3  
 SLVNT 0.00 ppm  
 EXREF 0.12 Hz  
 BF 38  
 RGAIN

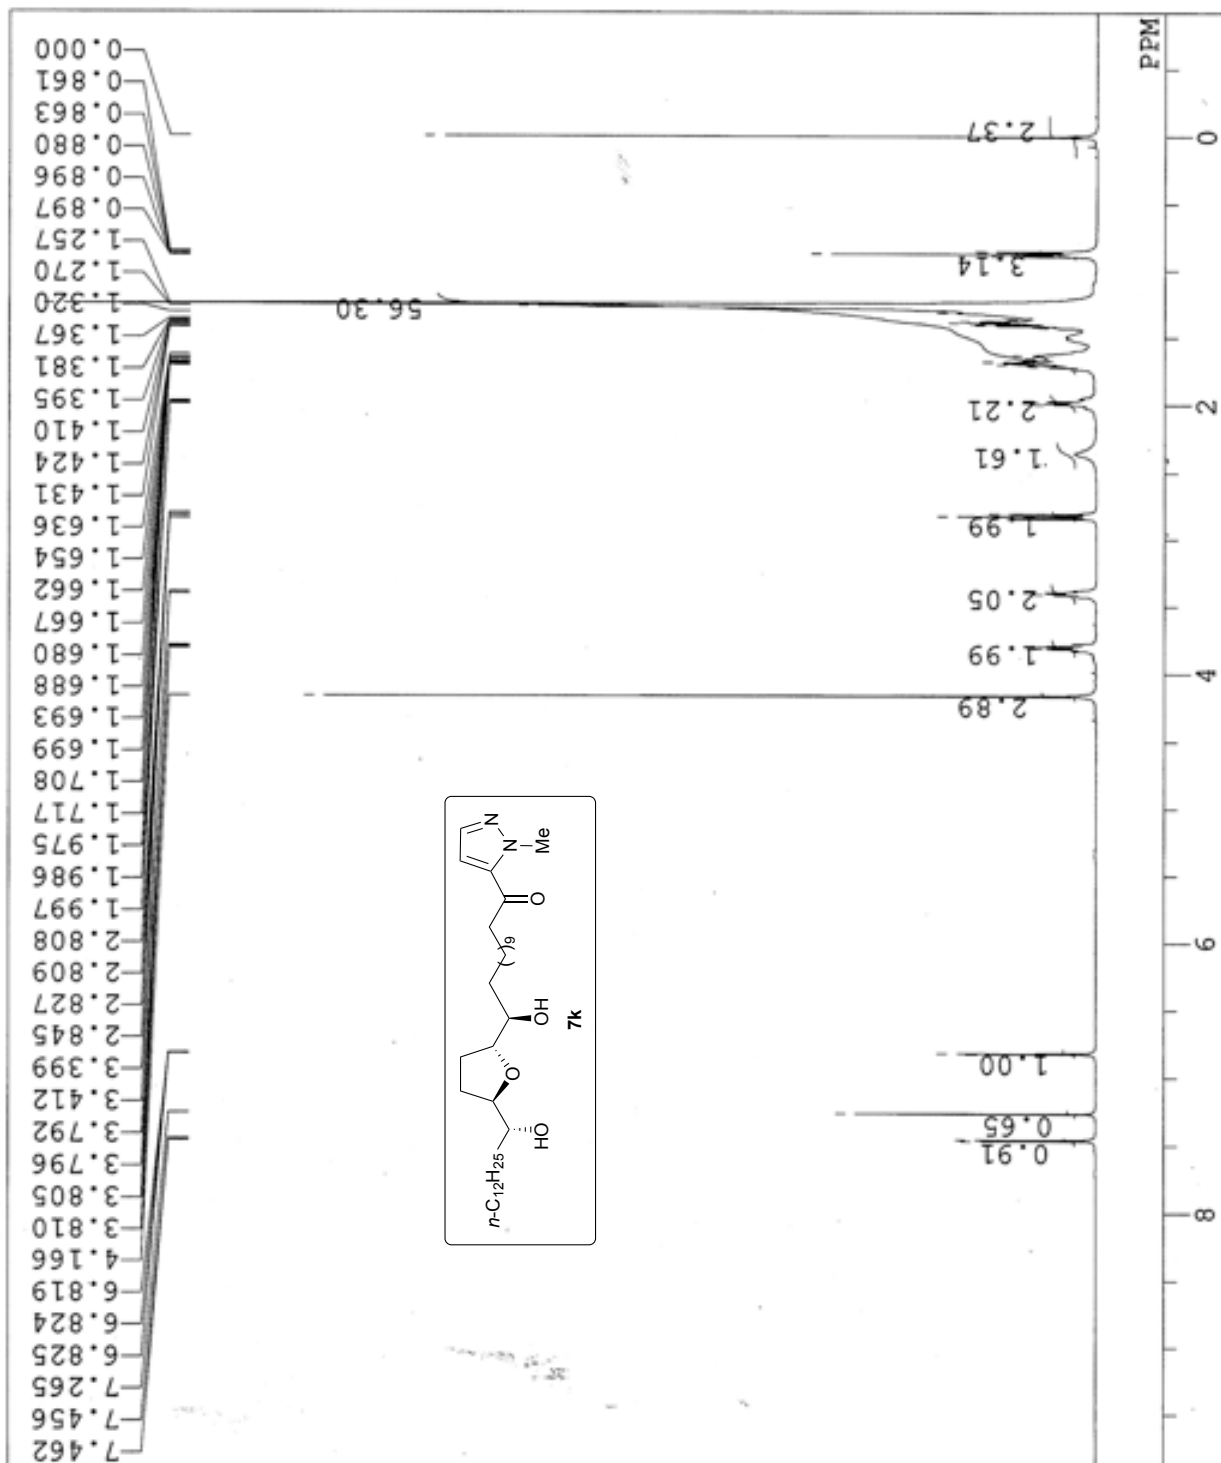

E:\,t,r,all@',foft  
 1022  
 Thu Oct 22 17:01  
 13C  
 bcm  
 125.65 MHz  
 0.00 KHz  
 127958.00 Hz  
 32768  
 33898.30 Hz  
 550  
 0.9667 sec  
 2.0333 sec  
 5.00 use  
 1H  
 25.8 c  
 CDCL3  
 77.00 ppm  
 1.20 Hz  
 26

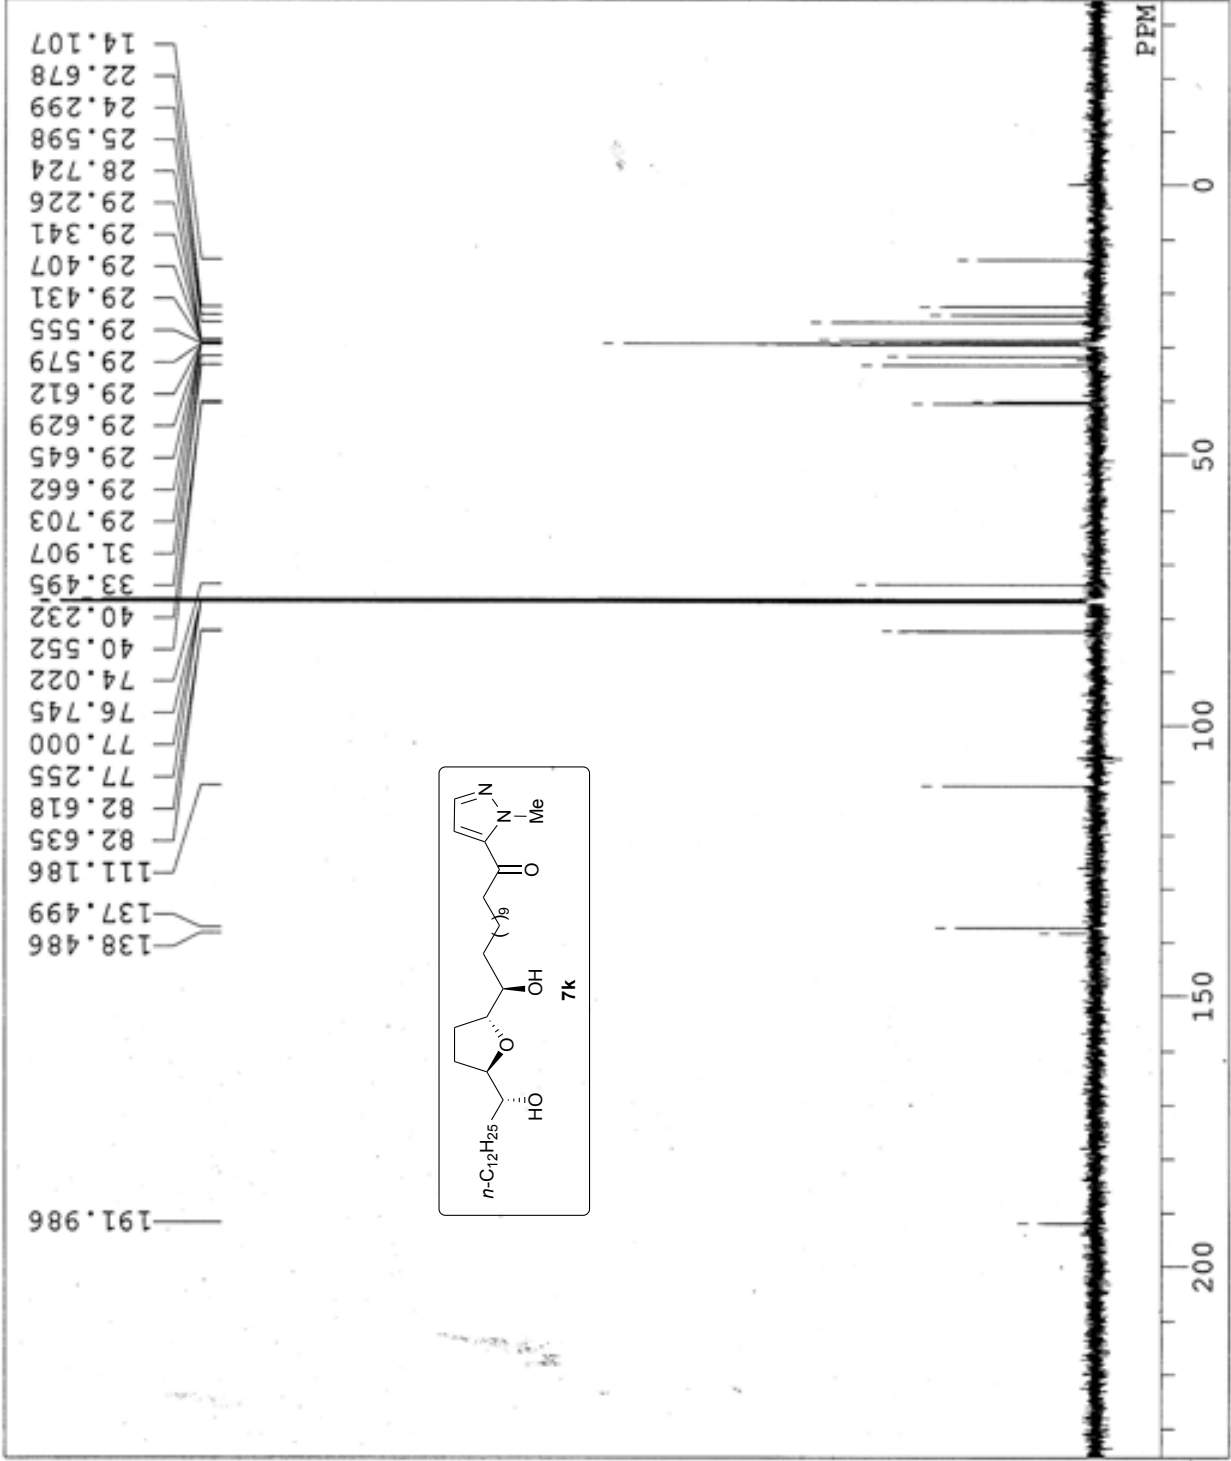

1H Line

Date: Mon Dec 18 13:49:32 2006  
 Filename sei202.mrdsta  
 Comment 1H Line  
 SliceHistory non

POINT 16384 points  
 SAMPO 16384 points  
 FREQU 10000.0 Hz  
 FILTR 5000 Hz  
 DELAY 40.0 uSAC  
 DEADT 57.2 uSAC  
 INVAL 100.0 uSAC  
 TIMES 32 LINES  
 DUMPY 1 LINES  
 PD 5.3616 SEC  
 ACQIM 1638.3999 uSAC  
 PREDL 0.01000 uSAC  
 ININT 1000.0000 uSAC  
 RESOL 0.61 Hz  
 PH1 5.50 uSAC  
 DBNUC N  
 DBFRQ 500.00 MHz  
 DBSET +162167.63 Hz  
 RGAIN 22  
 SCANS 32 LINES

SLVNT CDCL3  
 SPINNT 19 Hz  
 TEMP 24.3 C

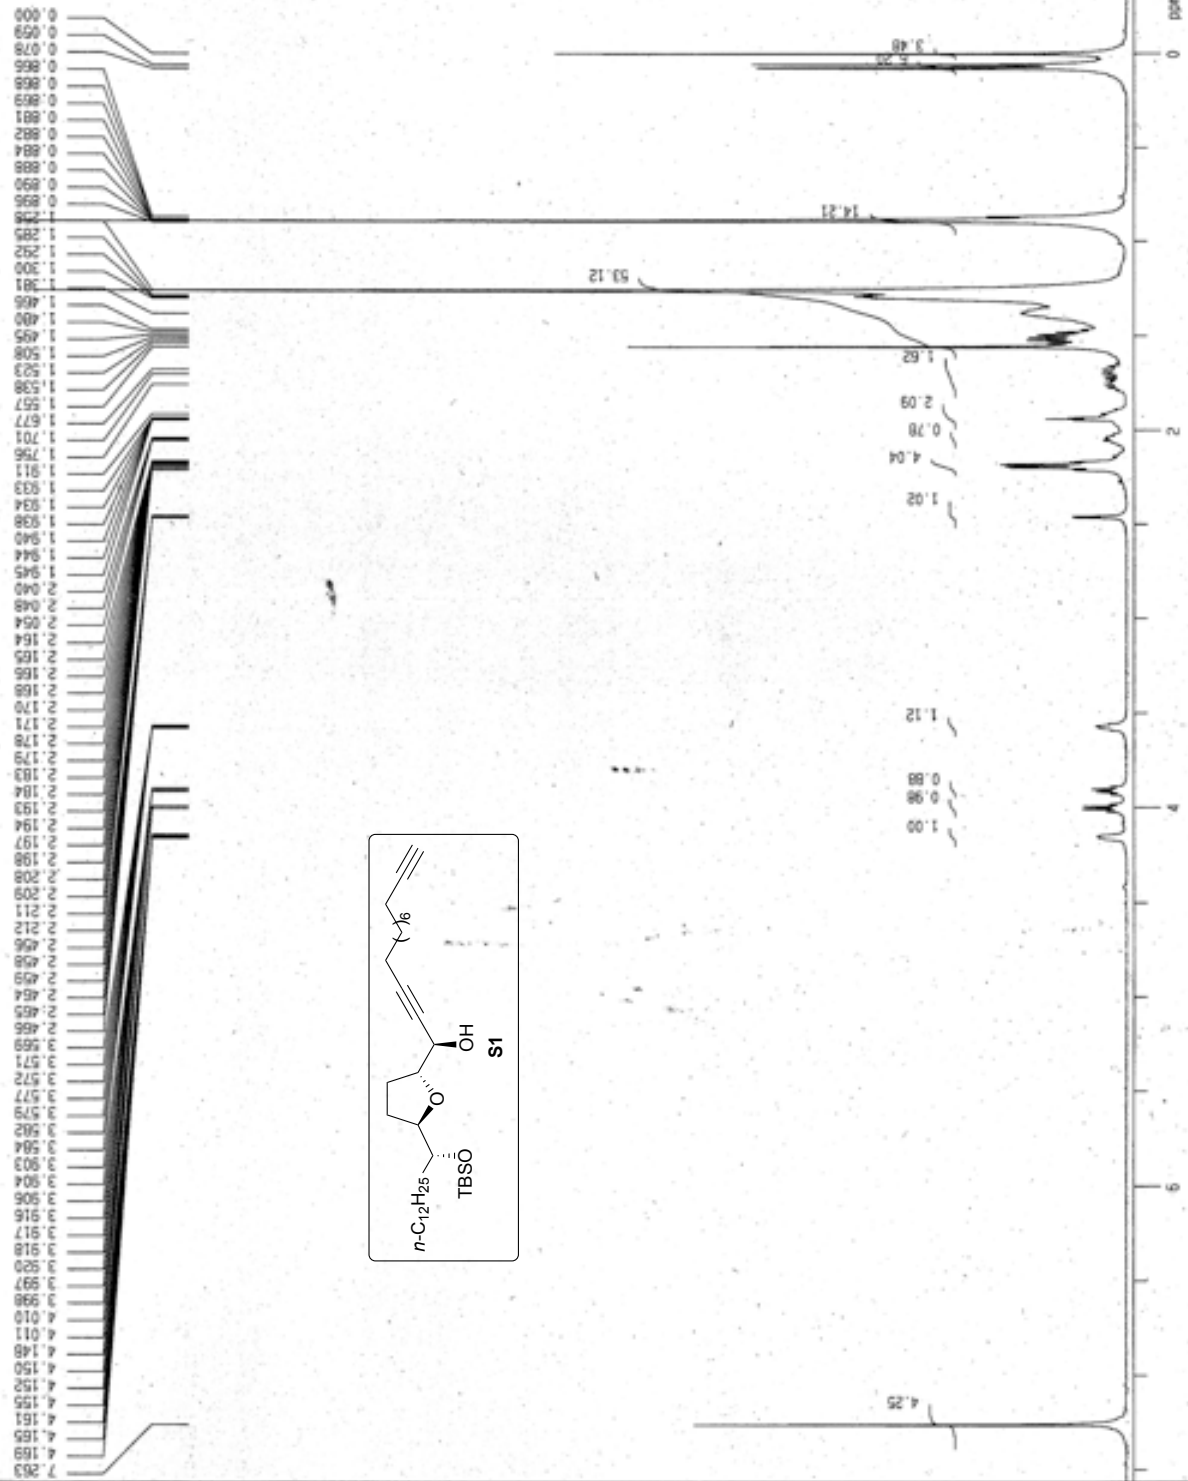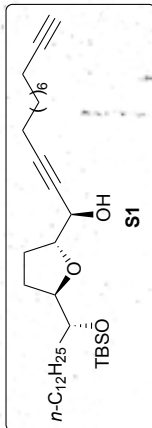

DFILE E:\300 C\TBS THF  
 COMNT FT-168  
 DATIM Sun Dec 10 16:45  
 OBNUC 13C  
 EXMOD BCM  
 OBFRQ 75.45 MHz  
 OBSET 124.00 KHz  
 OBFIN 1840.00 Hz  
 POINT 32768  
 FREQU 20356.23 Hz  
 SCANS 700  
 ACQTM 1.6097 sec  
 PD 1.3900 sec  
 PW1 4.60 use  
 IRNUC 1H  
 CTEMP 16.5 C  
 SLVNT CDCL3  
 EXREF 77.00 ppm  
 BF 1.20 Hz  
 RGAIN 24

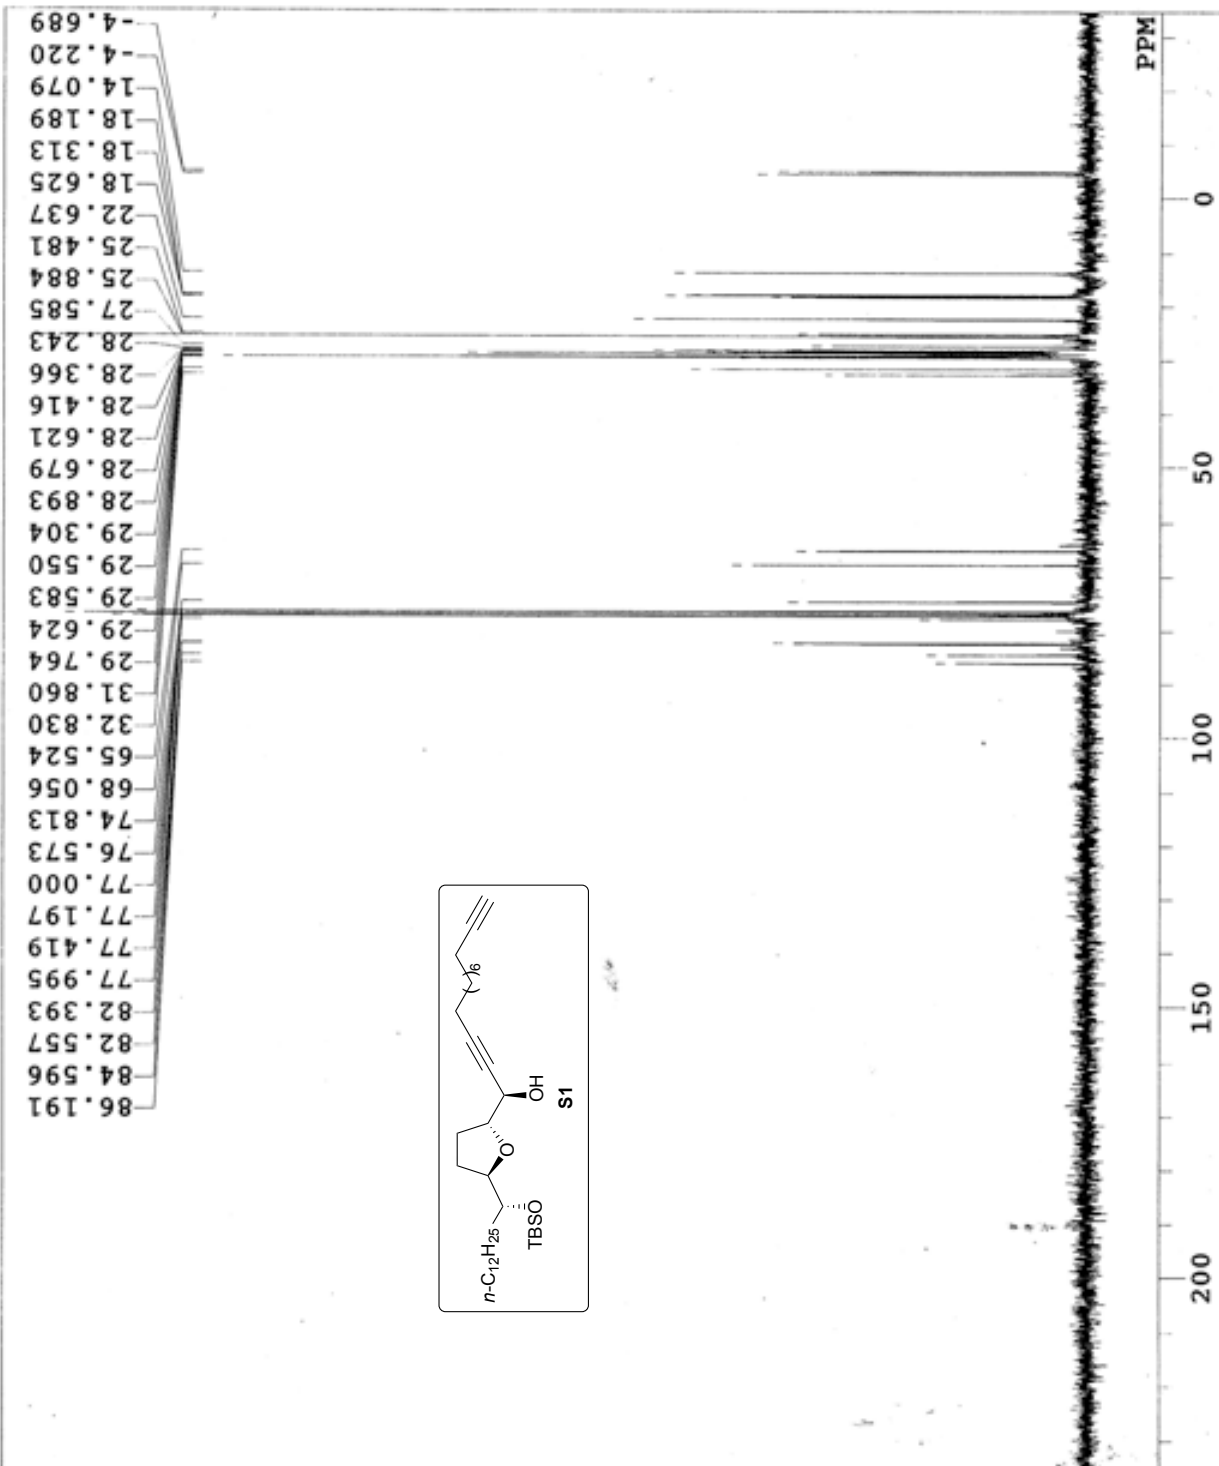



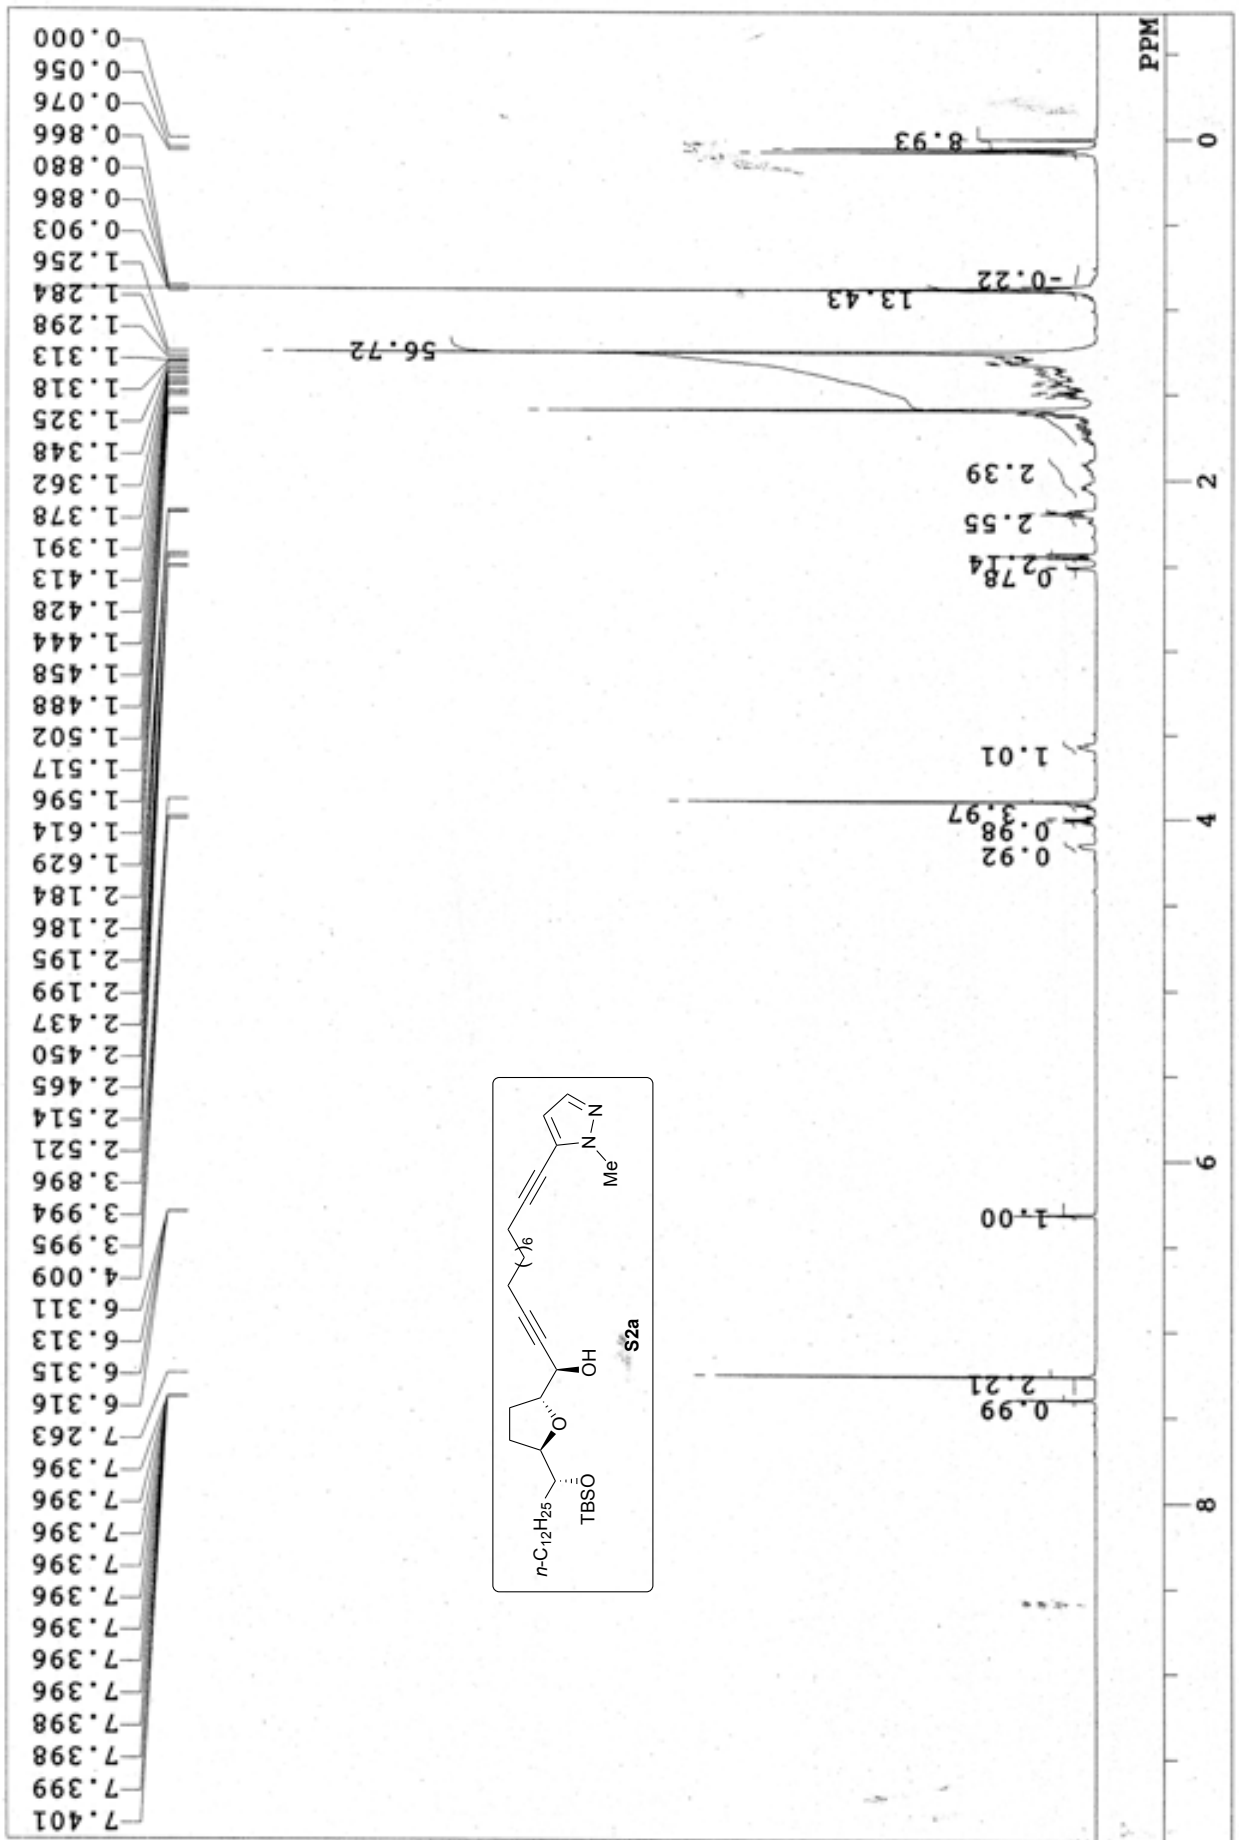

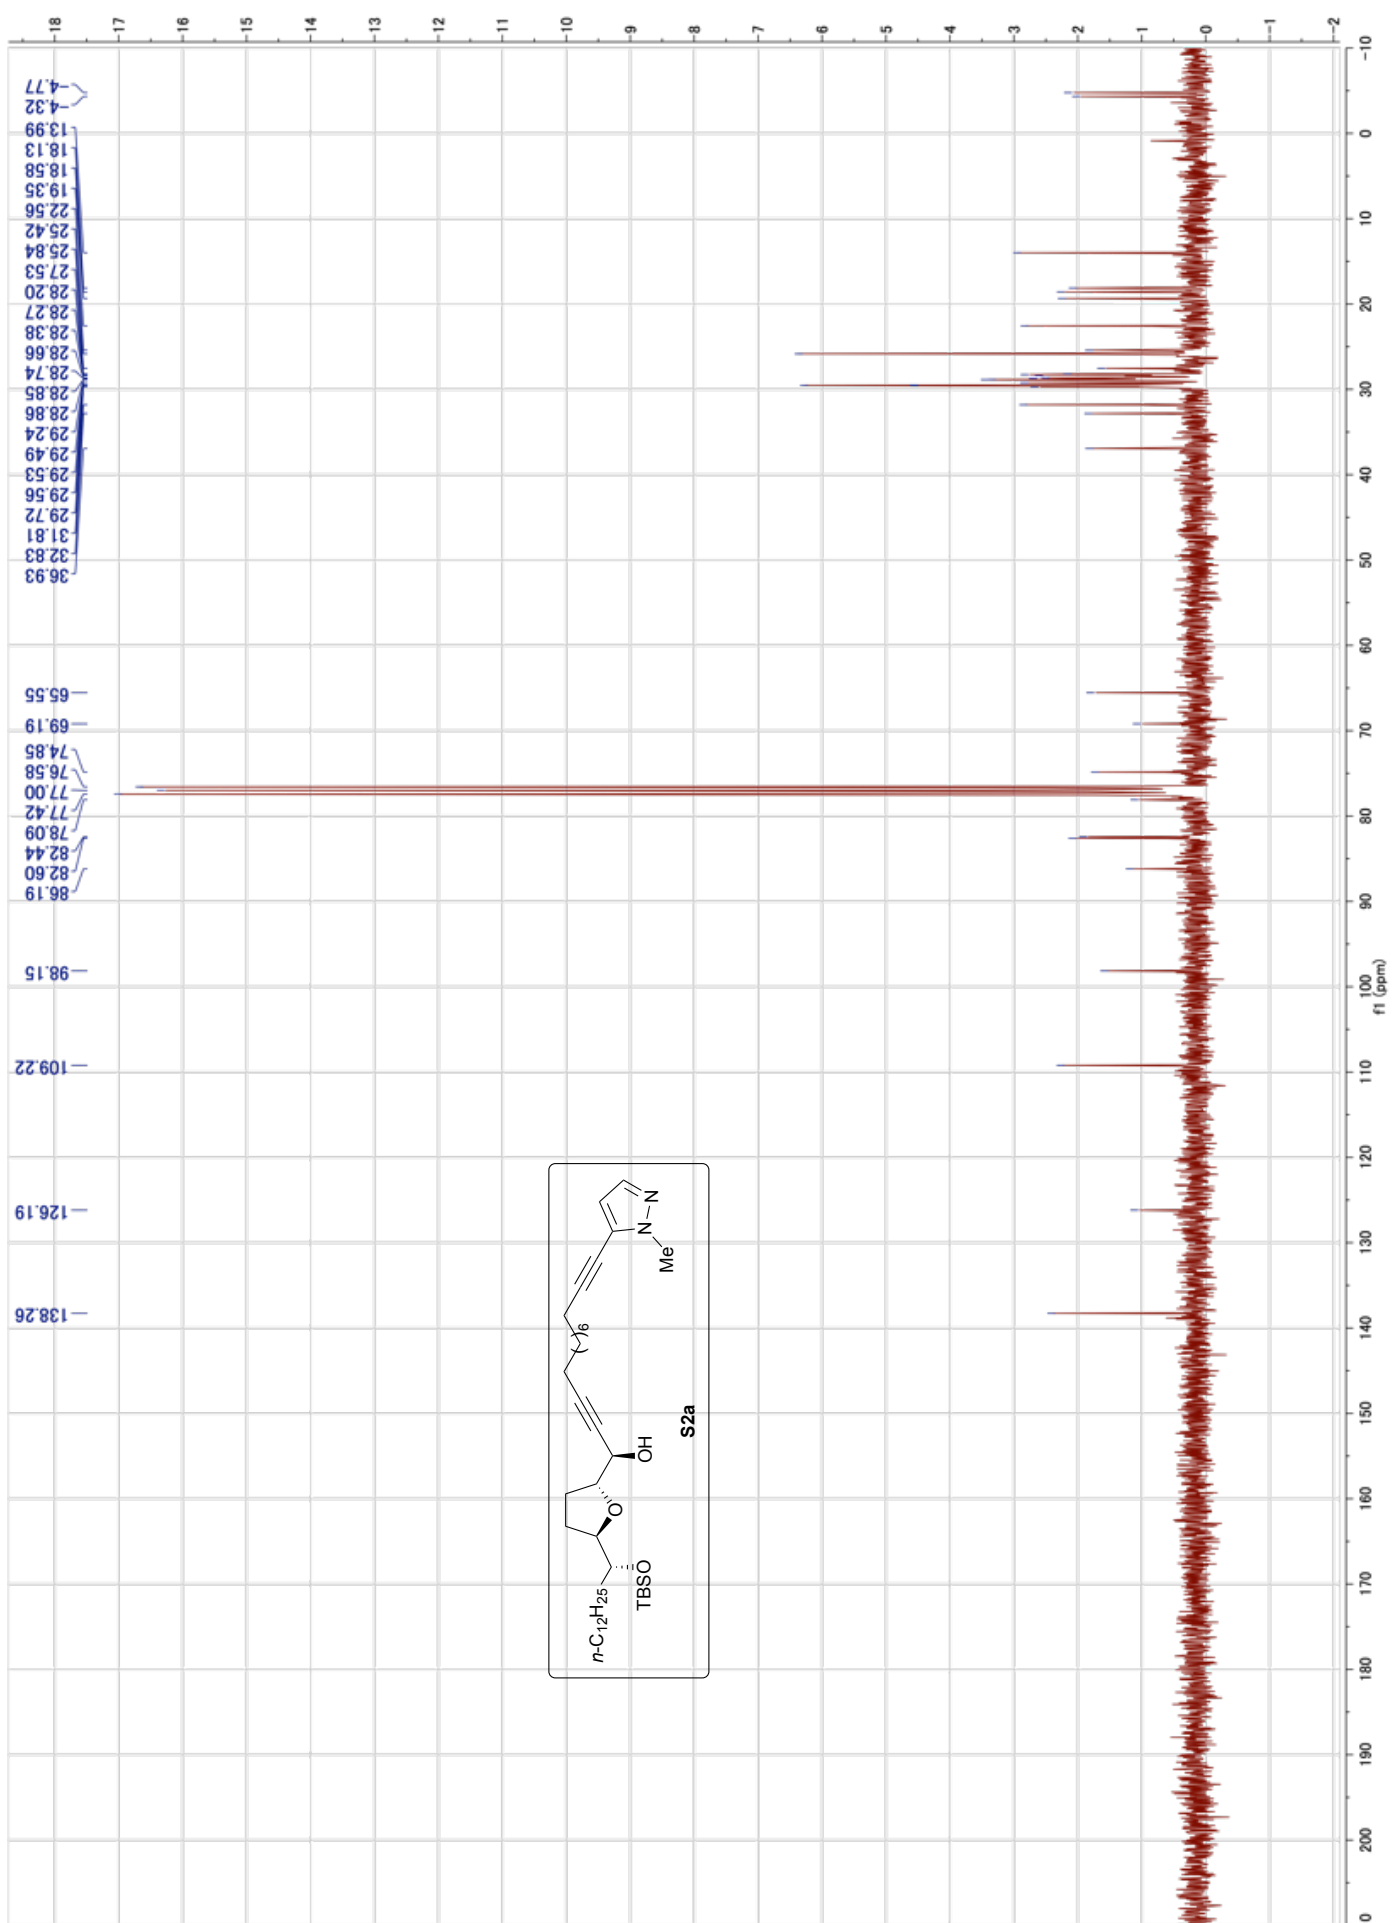

1H Line

Date : Fri Sep 1 17:42:36 2006  
Filename : 061703.msd3  
Comment : 1H Line  
Silicilistery : non  
EXCODE :  
POINT : 16384 points  
SAMPD : 16384 points  
FREQD : 10000.0 Hz  
FILTR : 5000 Hz  
DELA : 40.0 uSec  
DEADT : 57.2 uSec  
INVL : 100.0 uSec  
TIMES : 16 Times  
DUMM : 1 Times  
PD : 5.3616 sec  
ACQIM : 1638.3699 msec  
PREL : 0.01000 msec  
INVT : 1000.0000 msec  
RESOL : 0.61 Hz  
PFI : 5.50 uSec  
OBAN : 500.00 MHz  
OBFR : 162167.63 Hz  
OBSE : 15  
RGAIN : 15  
SCANS : 16 Times  
SLVNT : CDCL3  
SPINNT : 12 Hz  
SPINNT : 22.3 C

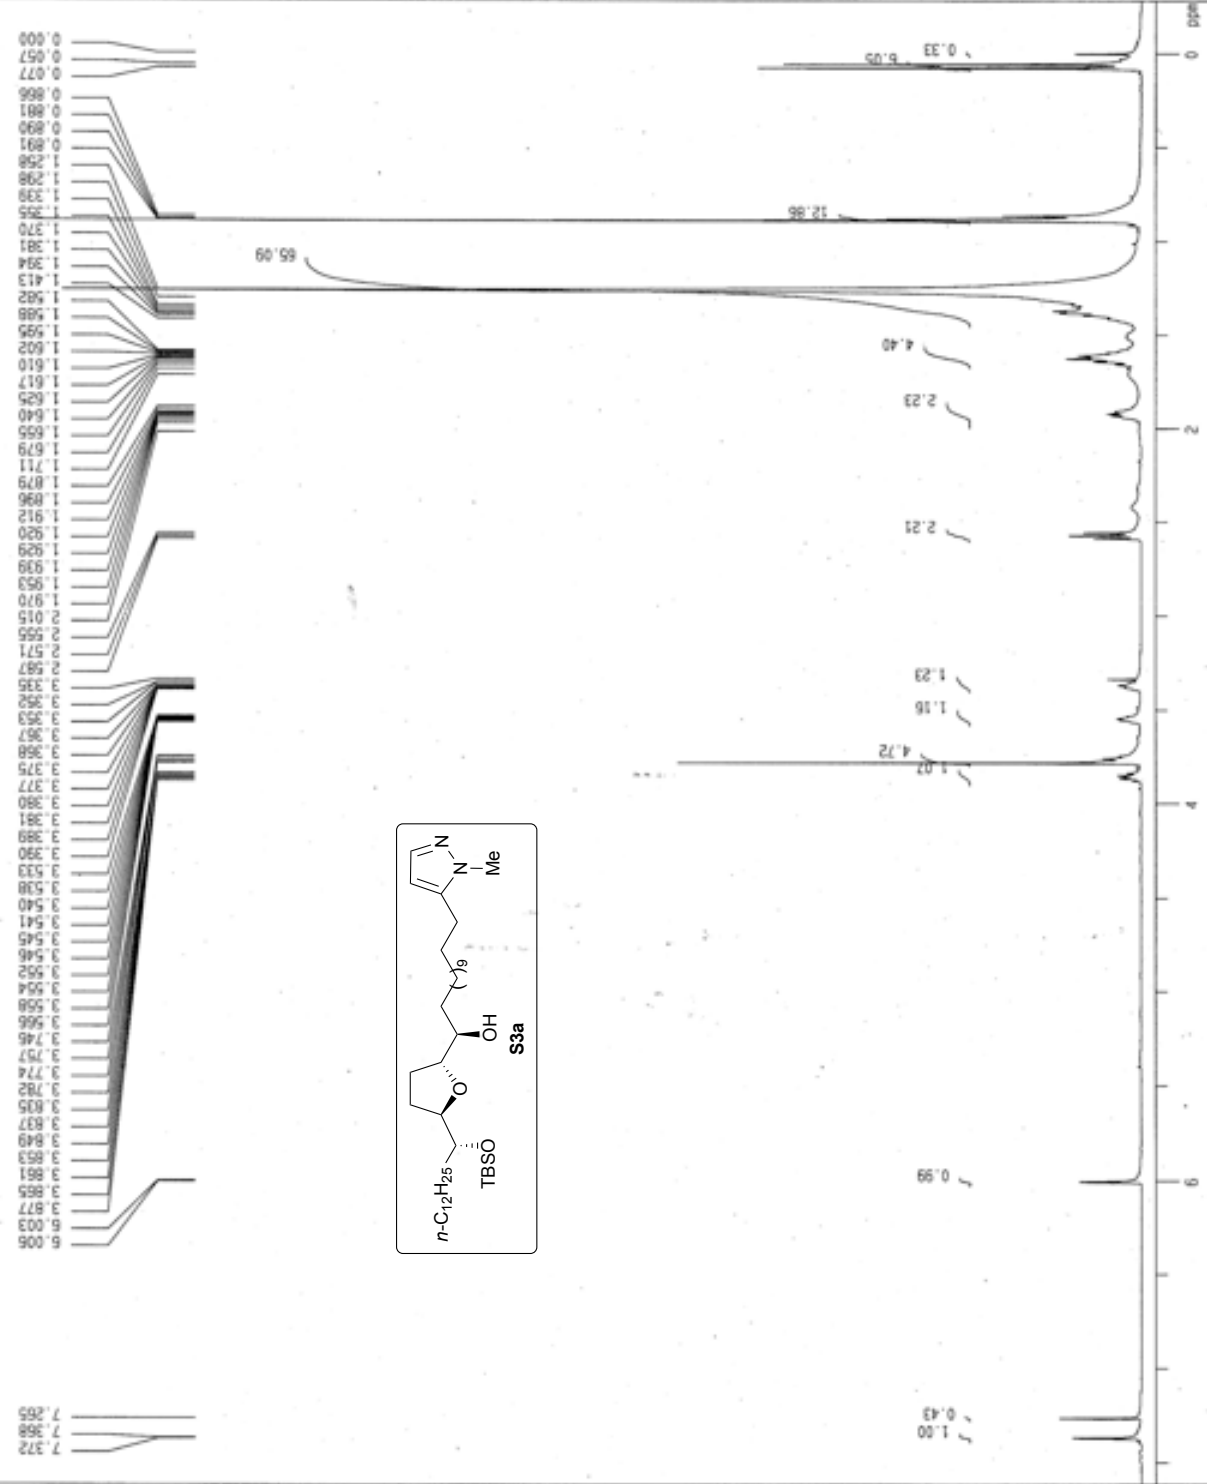

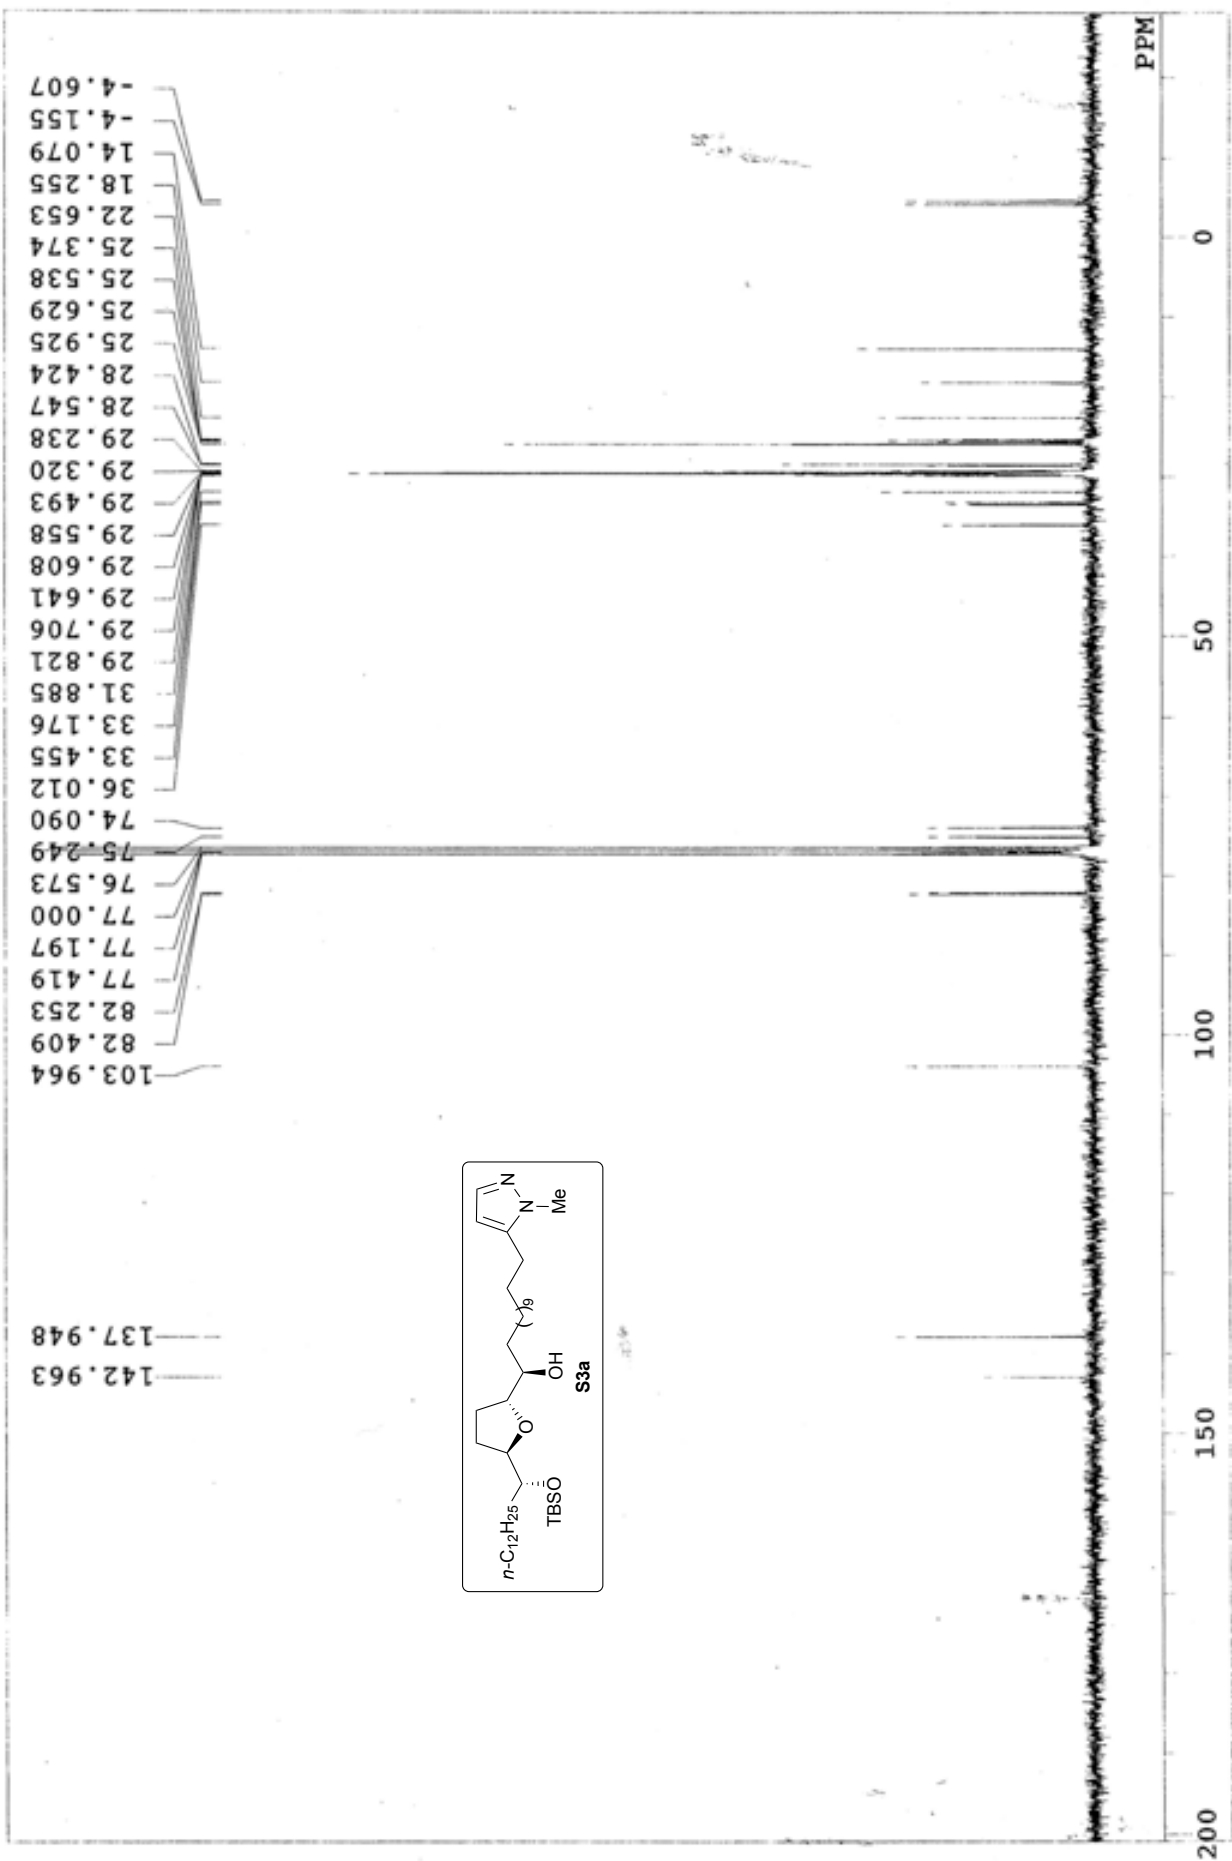

1H Line

Date : Fri Sep 15 18:17:26 2006

File Name

seizo3.mdata

Comment

1H Line

EXNOUSE

non

POINT 16384 points  
SAMPD 16384 points  
FREQD 10000.0 Hz  
FILTIR 5000 Hz  
DELAJ 40.0 usec  
DEADT 57.2 usec  
INTEI 100.0 usec  
TIMES 16 TIMES  
DUMMY 1 TIMES  
PD 5.3616 sec  
ACQTH 1630.3959 msec  
PREDL 0.01000 msec  
ININT 1000.0000 msec  
RESOL 0.61 Hz  
PM1 5.50 usec  
OBNUC 1H  
OBFRQ 500.00 MHz  
OBFRQ 462167.53 Hz  
ORSET 17  
RGAIN 15 times  
SCANS 15 times  
SLWNT 13 Hz  
SPINNT 21.7 C  
TEMP

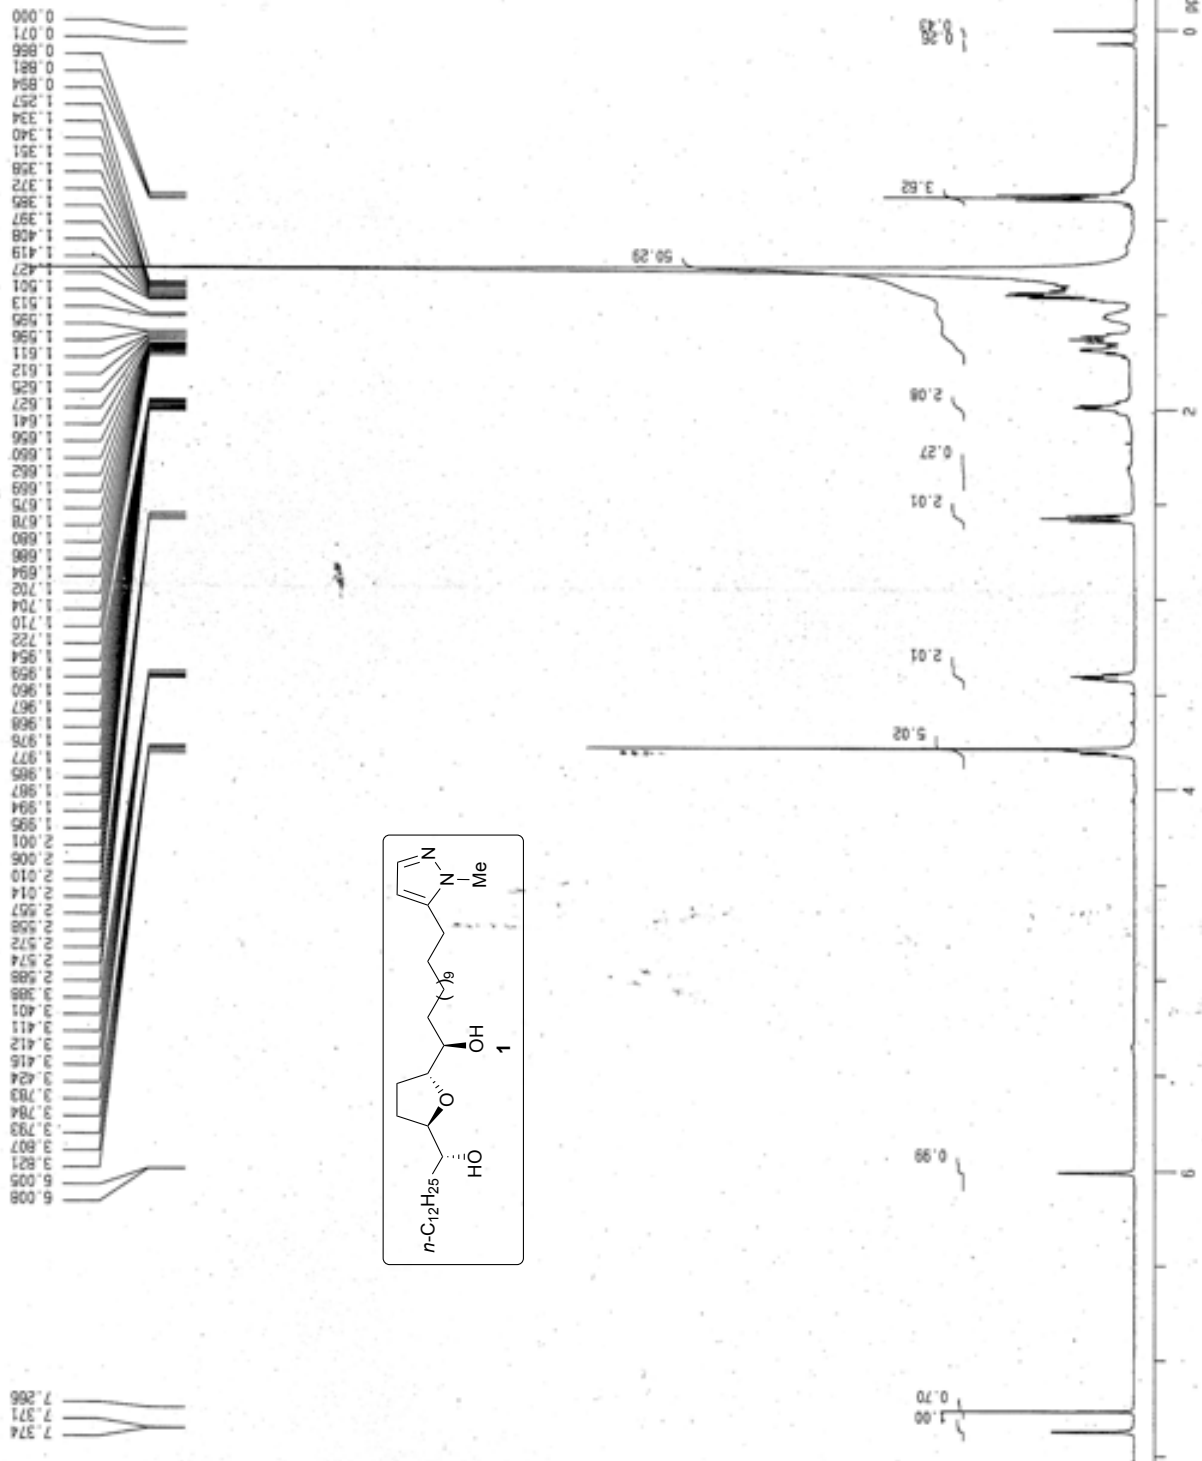

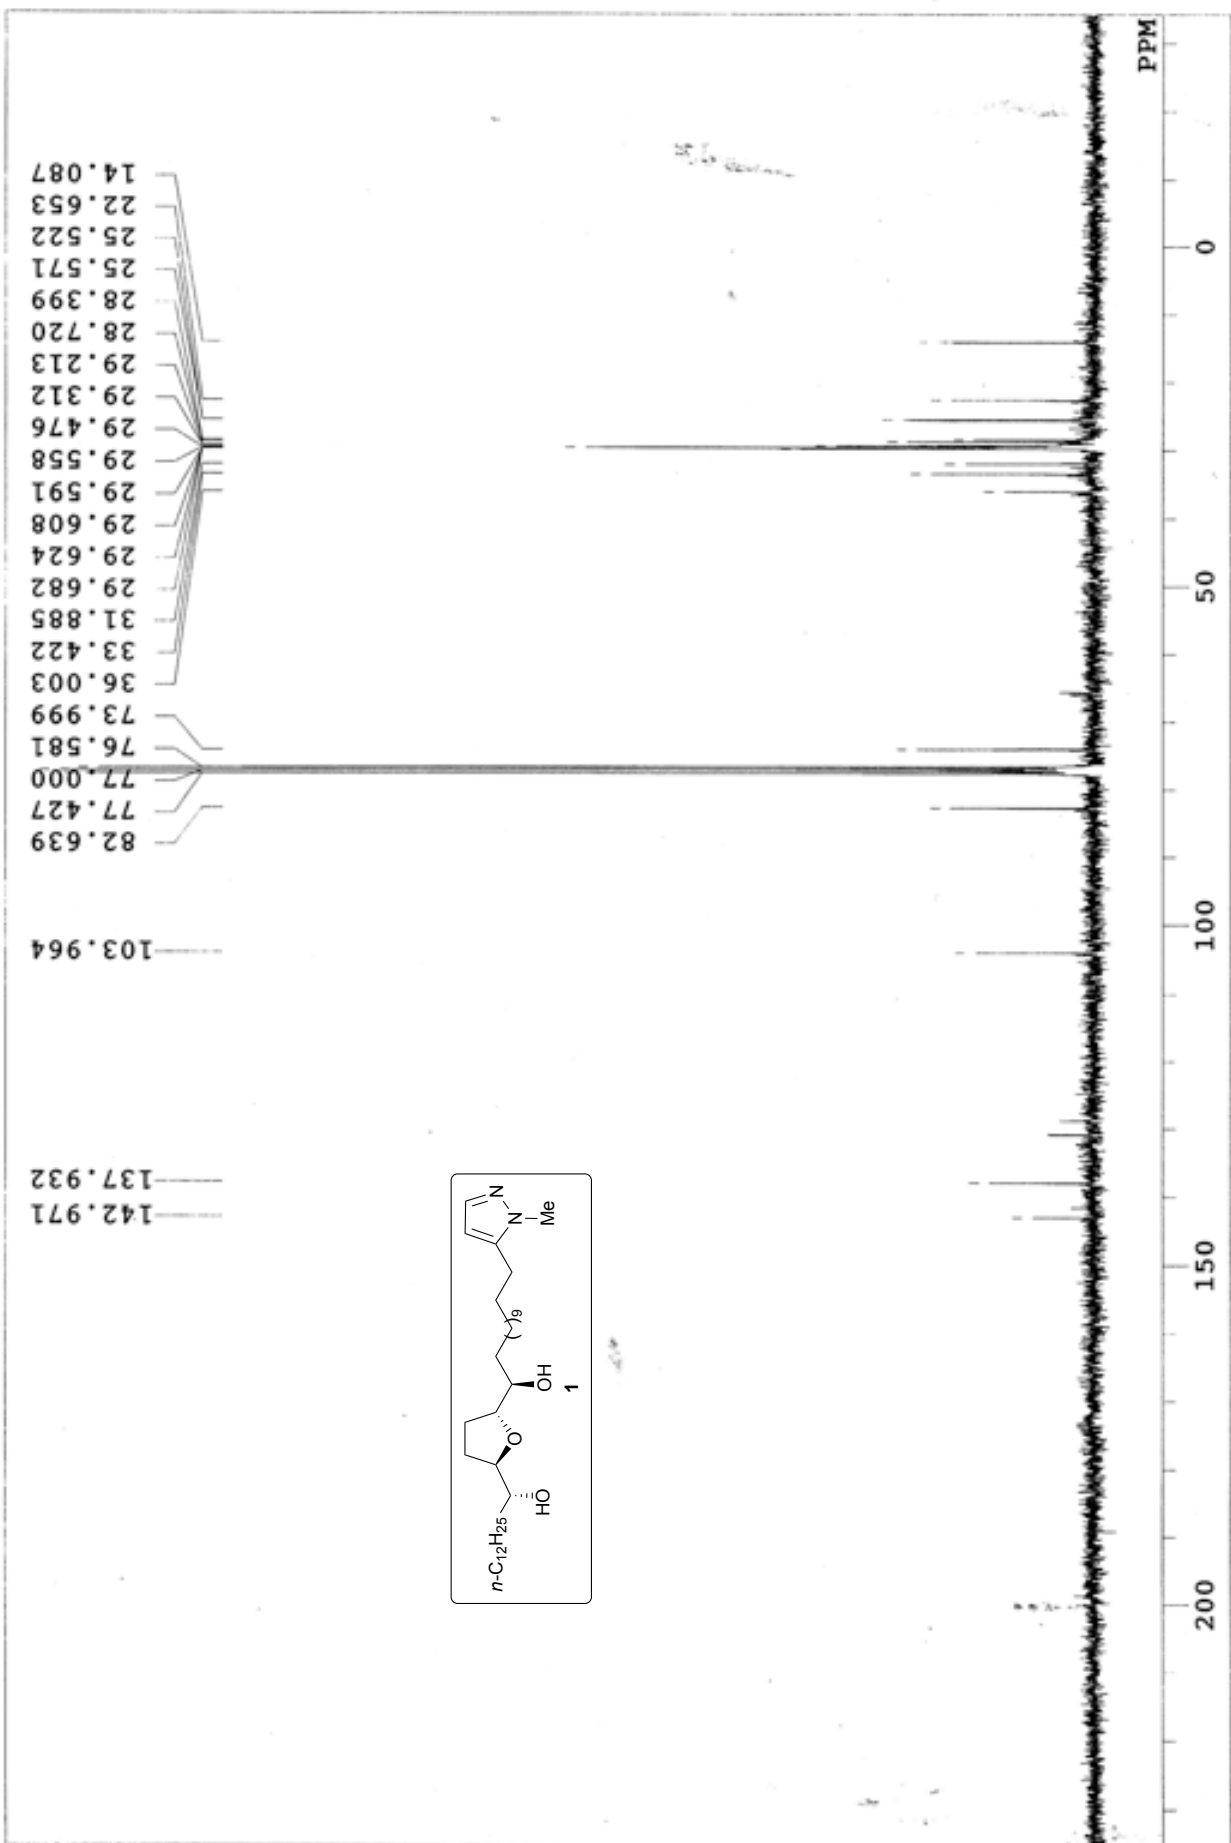

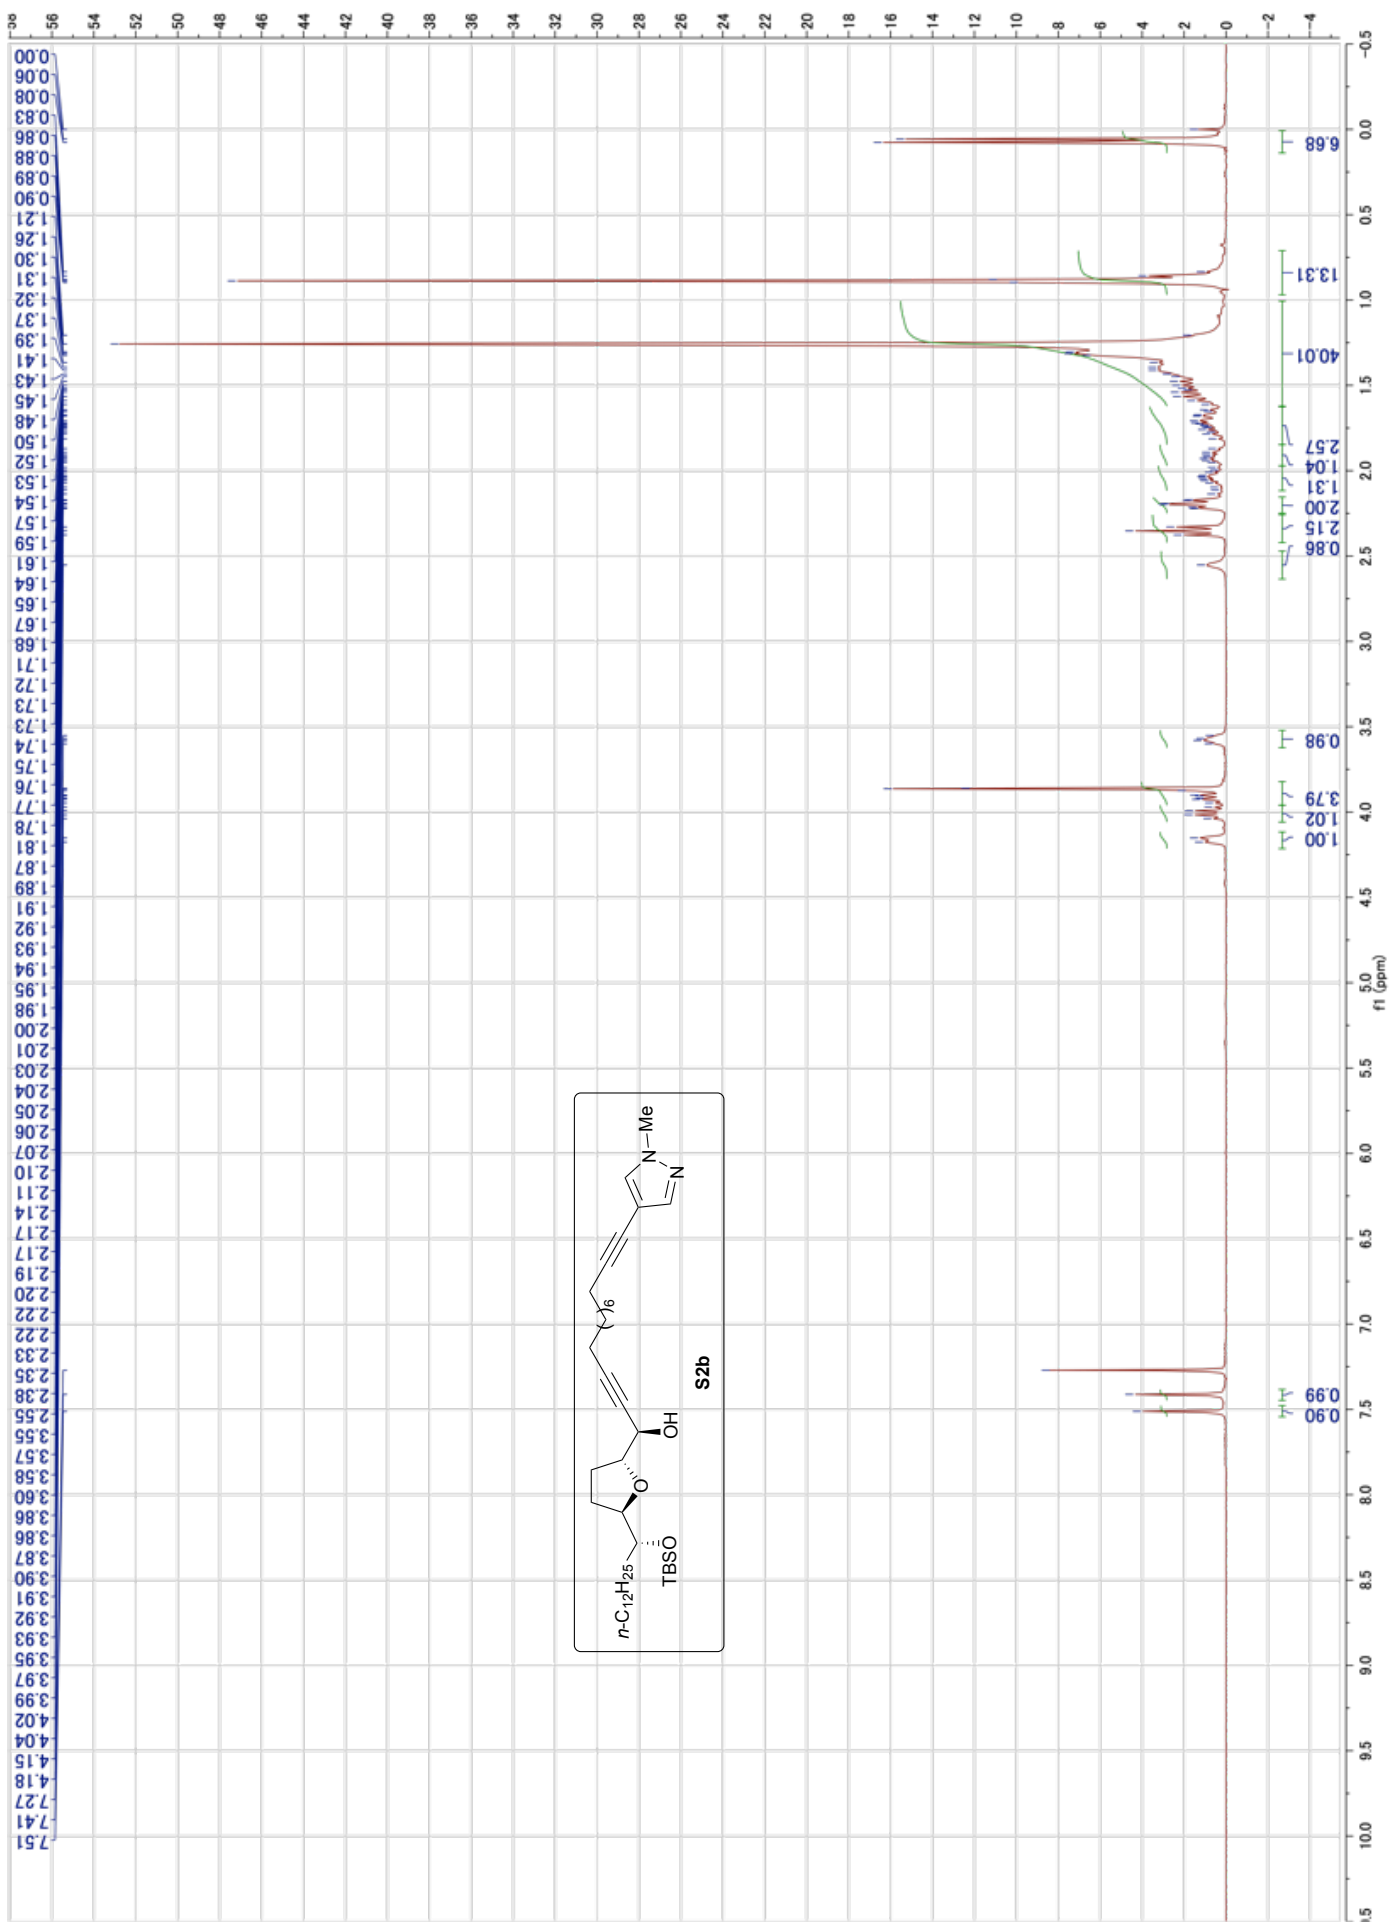

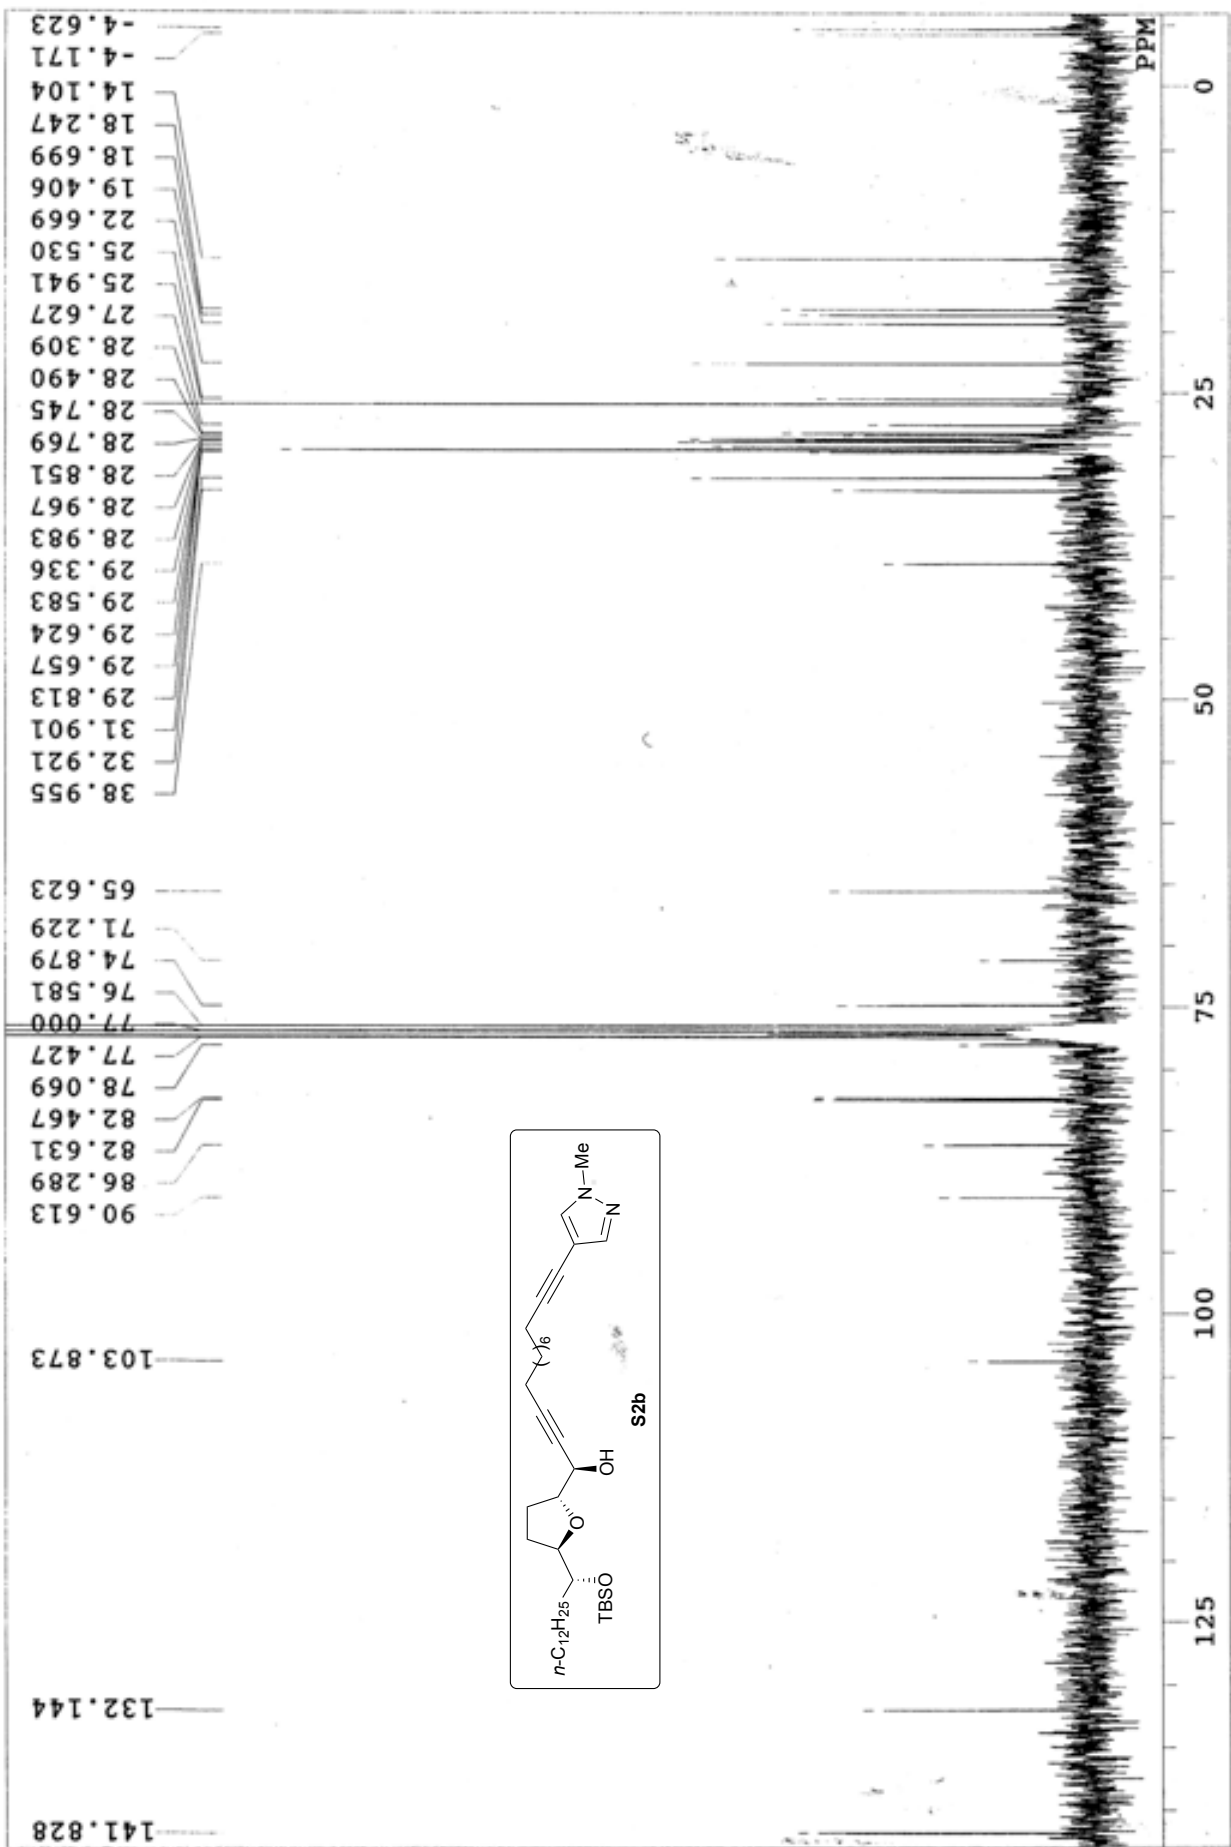



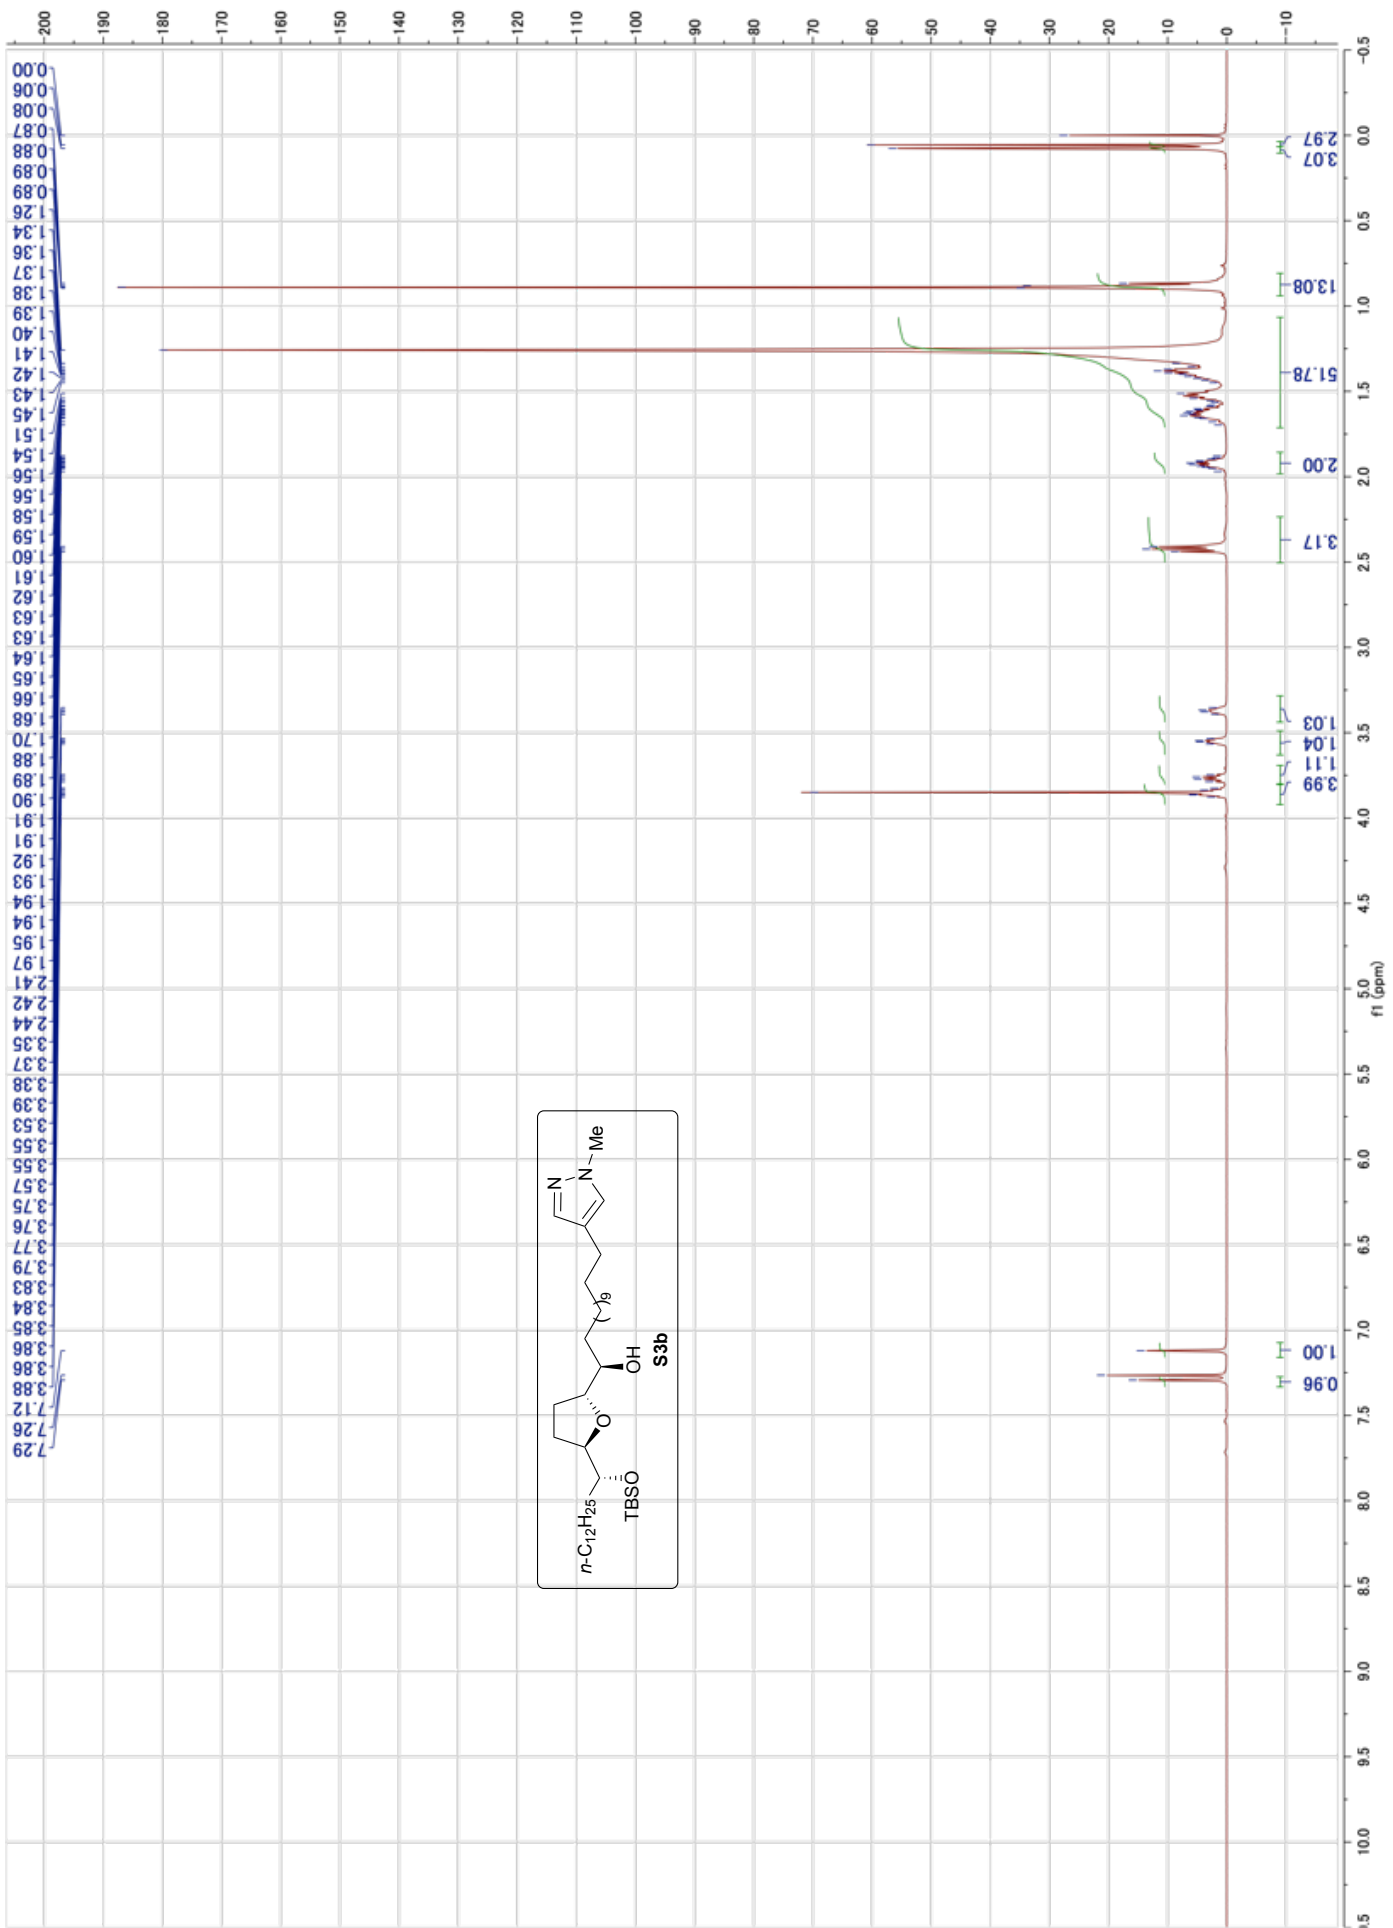

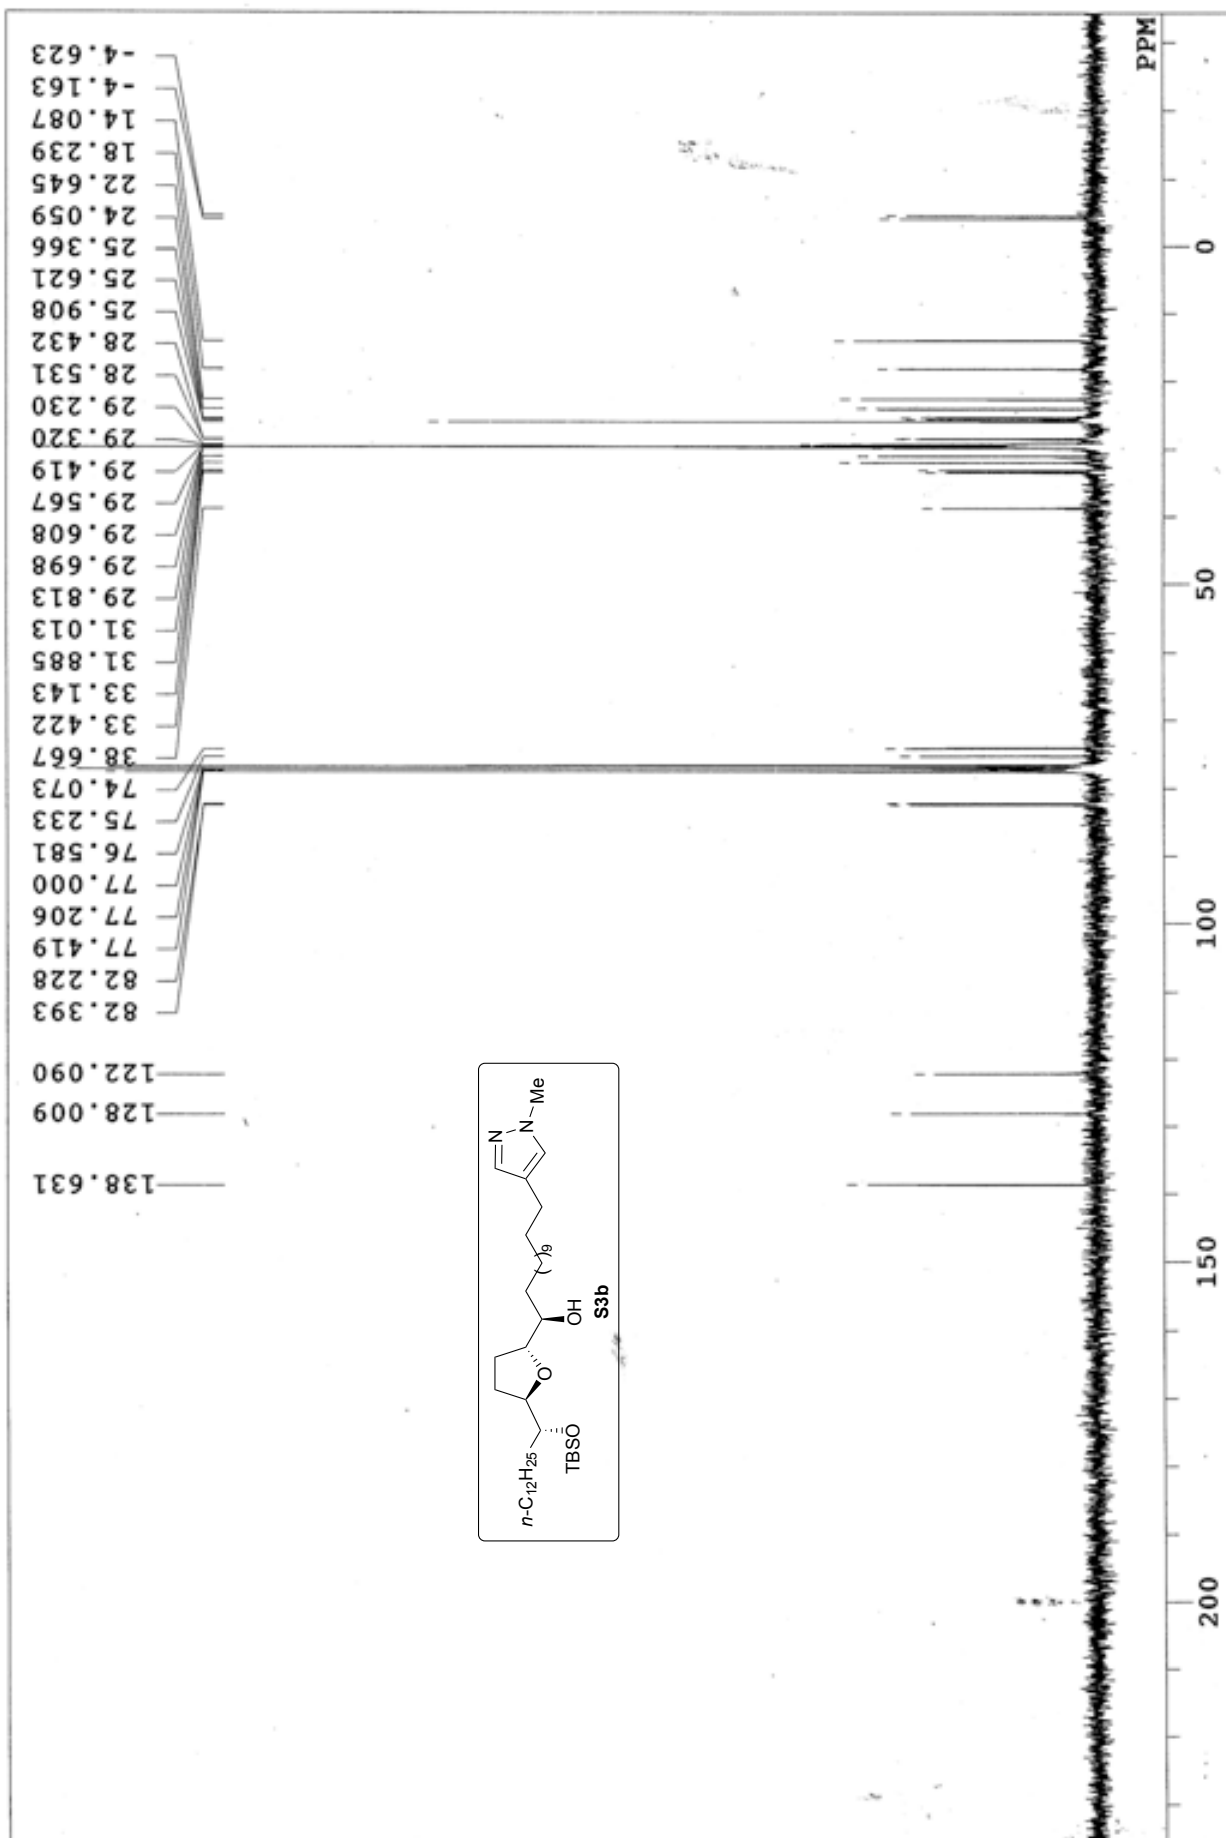

1H Line

7.293  
7.263  
7.121

3.850  
3.821  
3.807  
3.793  
3.781  
3.422  
3.410  
3.399  
3.385  
2.439  
2.425  
2.405  
2.398  
1.994  
1.985  
1.976  
1.724  
1.705  
1.688  
1.680  
1.672  
1.655  
1.601  
1.540  
1.527  
1.512  
1.497  
1.427  
1.419  
1.408  
1.397  
1.385  
1.373  
1.257  
1.093  
0.893  
0.856

Date : Mon Jan 29 13:56:39 2007  
Filename : sc102.mrdeta  
Comment : 1H Line  
Slicecriteria : non  
EMCODE :  
PRODT 16384 points  
SAMPO 16384 points  
FREQU 10000.0 Hz  
FILTR 5000 Hz  
DELAY 40.0 uSec  
DEADT 57.2 uSec  
INTEL 100.0 uSec  
TIMES 32 times  
DUMY 1 times  
PD 5.3616 sec  
ACQTH 1638.3959 sec  
PREDL 0.01000 sec  
ININT 1000.0000 sec  
RESOL 0.61 Hz  
PWI 5.50 uSec  
OBNUC 1H  
OBFTQ 500.00 MHz  
OBSET \*162167.63 Hz  
RGAIN 17  
SCANS 32 times  
SLVNT CDCl3  
SPINNT 64 Hz  
SPINNG 22.7 C

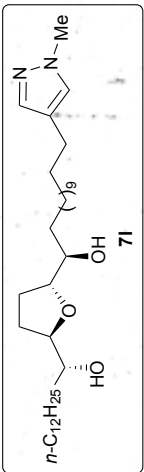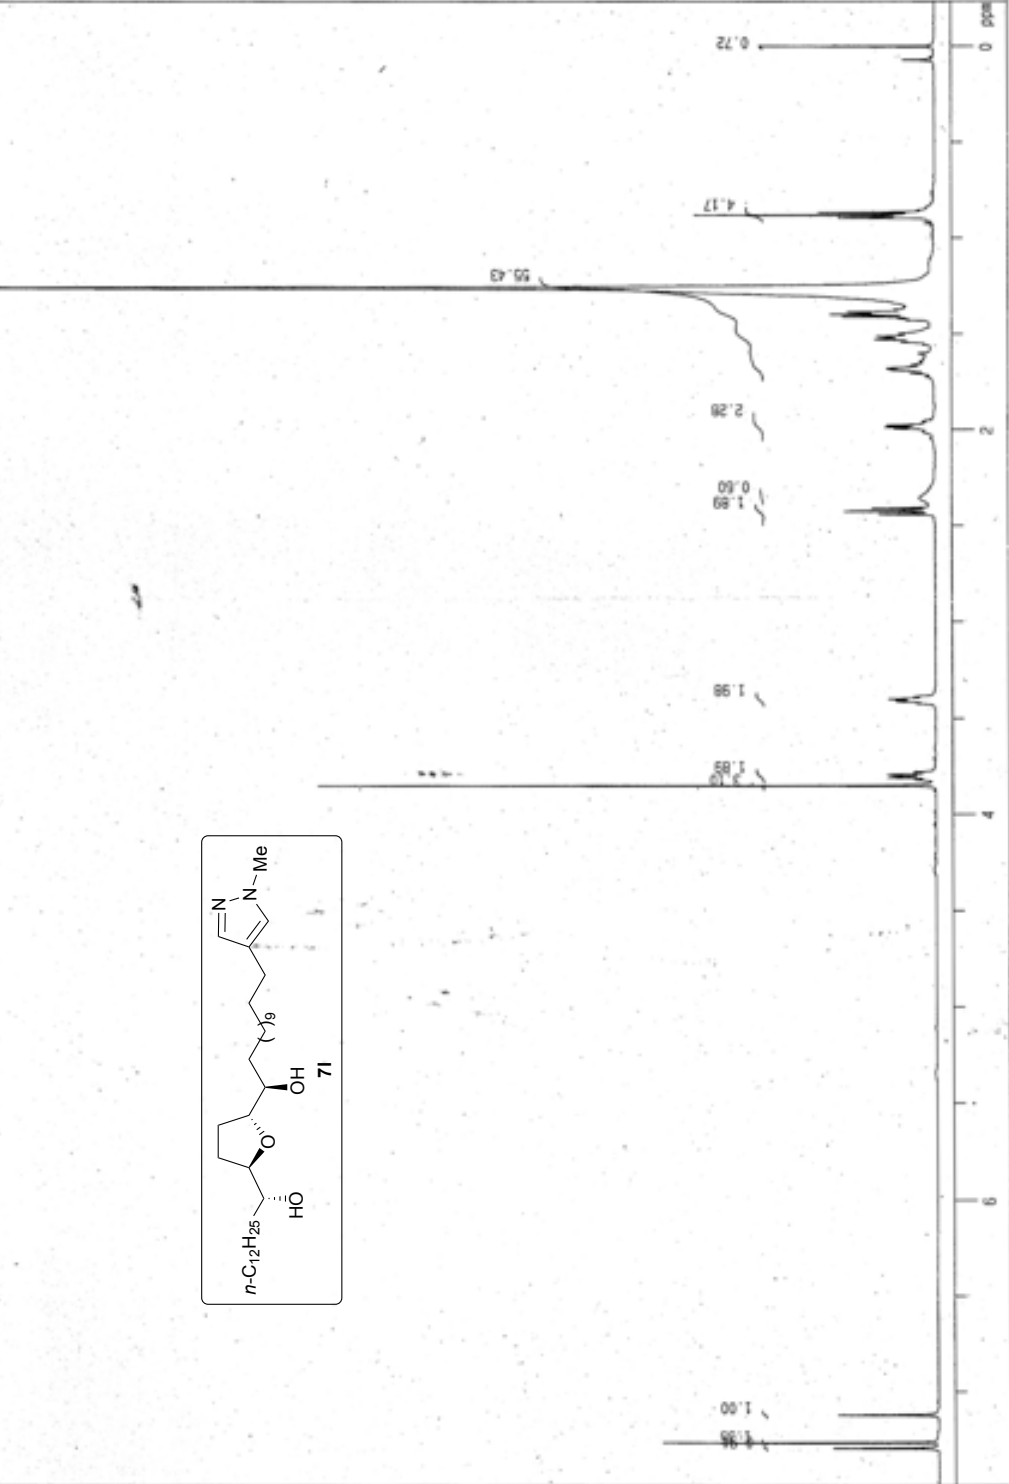

DFILE E:\300 C\THF 4pyra fir  
 COMNT THF 4pyra fin  
 DATIM Sat Apr 28 05:07:32 20  
 OBNUC 13C  
 EXMOD BCM  
 OBFRQ 75.45 MHz  
 OBSET 124.00 KHz  
 OBFIN 1840.00 Hz  
 POINT 32768  
 FREQU 20356.23 Hz  
 SCANS 1100  
 ACQTM 1.6097 sec  
 PD 1.3900 sec  
 PW1 4.60 usec  
 IRNUC 1H  
 CTEMP 22.6 C  
 SLVNT CDCL3  
 EXREF 77.00 ppm  
 BF 1.20 Hz  
 RGAIN 26

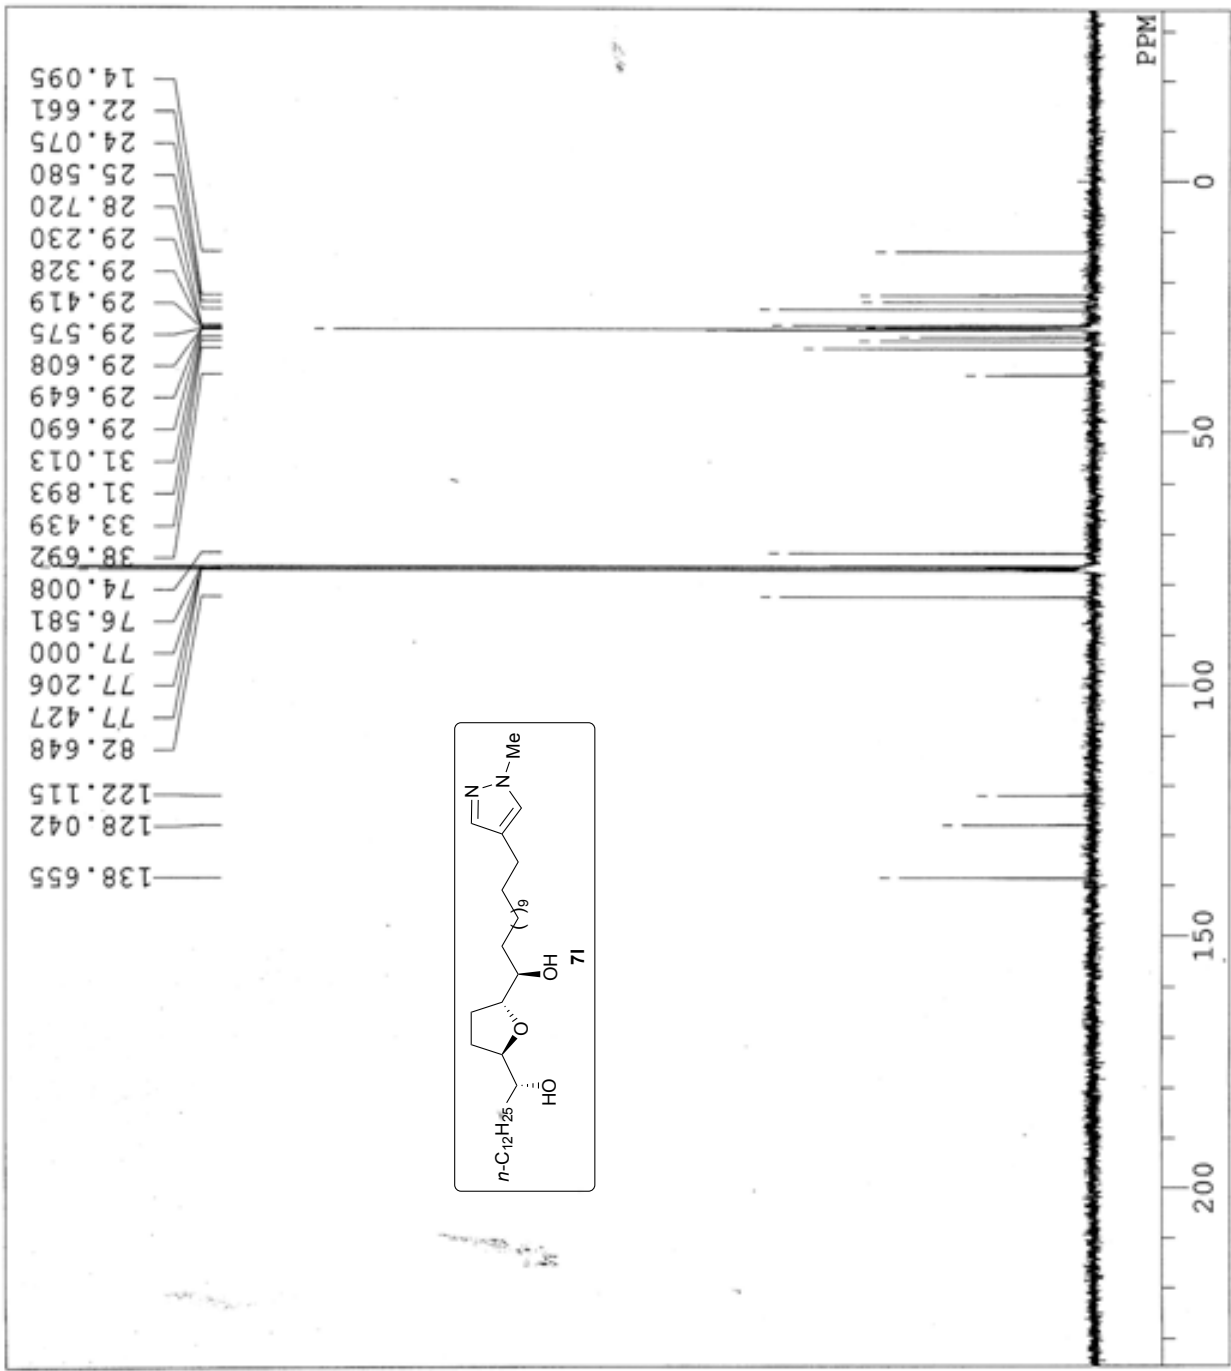

E:\,t,r,all@',foft  
 Sat Sep 11 01:55  
 1H non  
 500.00 MHz  
 0.00 KHz  
 162160.00 Hz  
 8192  
 10000.00 Hz  
 8  
 0.8192 sec  
 6.1808 sec  
 5.70 use  
 1H  
 23.1 c  
 CDCL3  
 0.00 ppm  
 0.12 Hz  
 13

DFILE  
 COMNT  
 DATIM  
 OBNUC  
 EXMOD  
 OBFRQ  
 OBSET  
 OBFIN  
 POINT  
 FREQU  
 SCANS  
 ACQTM  
 PD  
 PW1  
 IRNUC  
 CTEMP  
 SLVNT  
 EXREF  
 BF  
 RGAIN

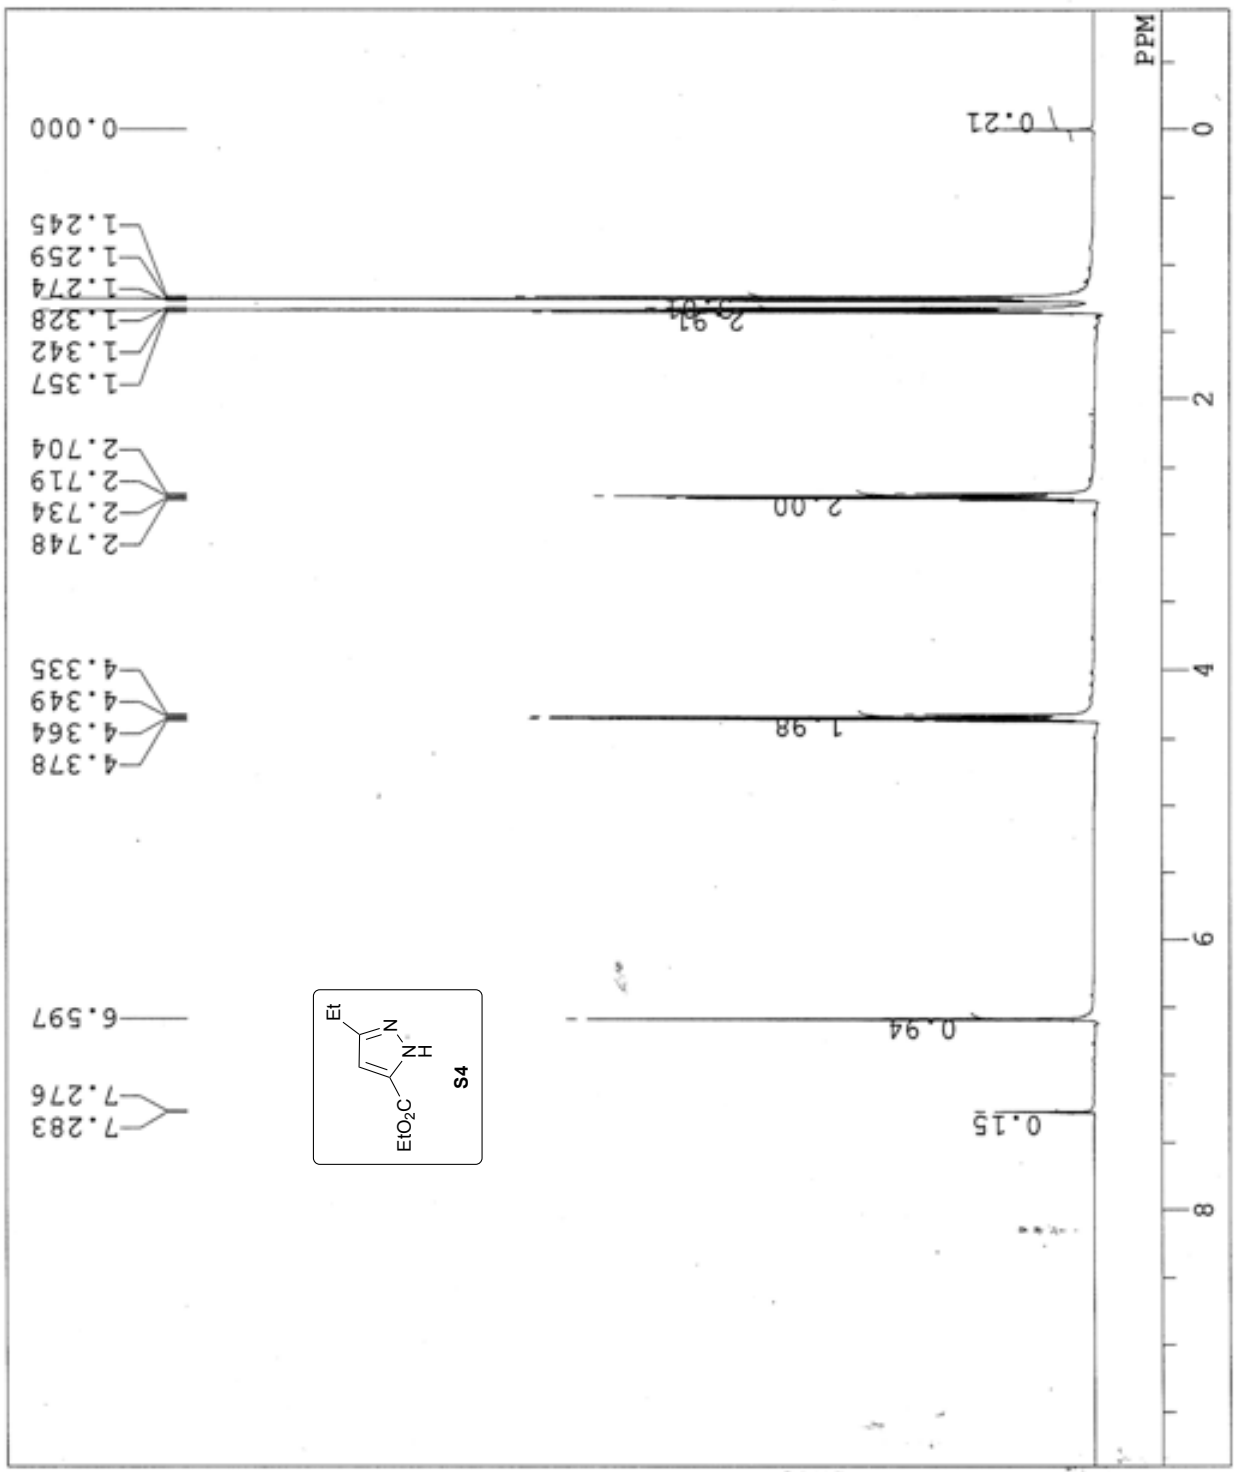

DFILE E:\,t,r,all@",,foft  
 COMNT single\_pulse\_dec  
 DATIM 11-09-2010 02:52  
 OBNUC 13C  
 EXMOD single\_pulse\_dec  
 OBFRQ 100.53 MHz  
 OBSET 5.35 KHz  
 OBFIN 5.86 Hz  
 POINT 26214  
 FREQU 25125.24 Hz  
 SCANS 500  
 ACQTM 1.0433 sec  
 PD 2.0000 sec  
 PW1 3.17 use  
 IRNUC 1H  
 CTEMP 24.2 C  
 SLVNT CDCL3  
 EXREF 77.00 ppm  
 BF 1.20 Hz  
 RGAIN 60

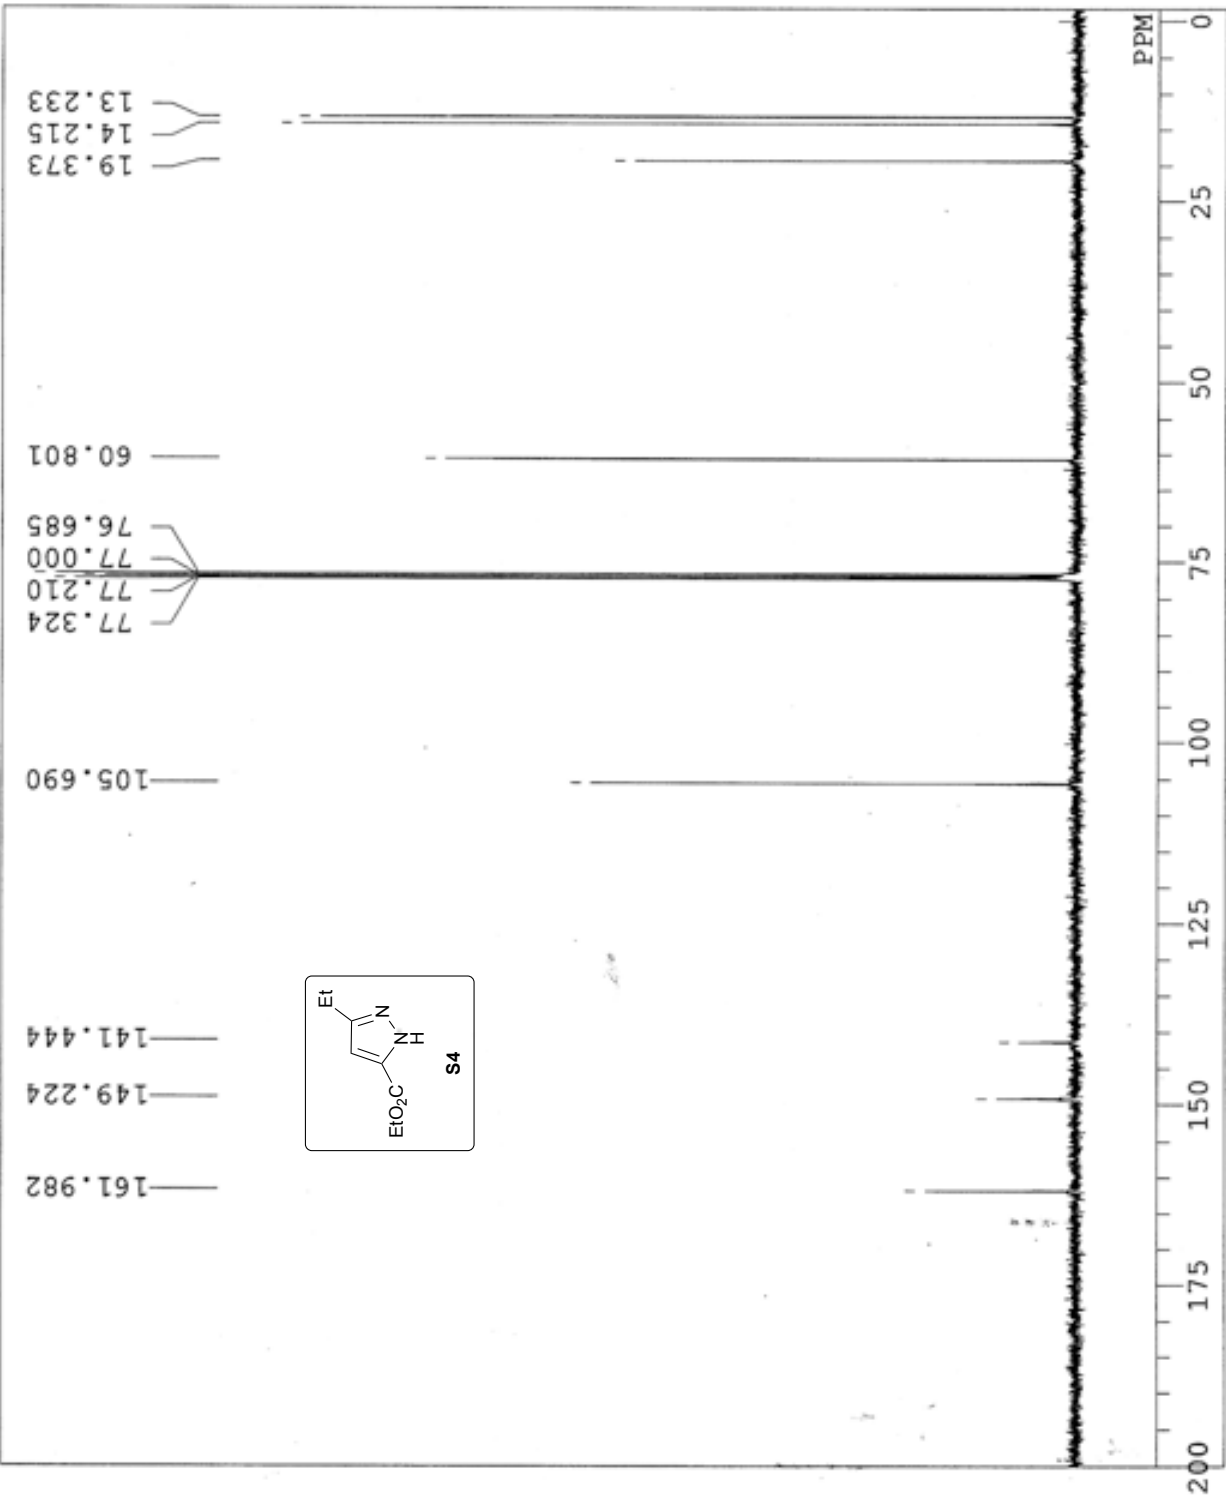

DFILE F:\t,r,all@r,foft  
 COMNT  
 DATIM 13-09-2010 19:02  
 OBNUC 1H  
 EXMOD single\_pulse.ex2  
 OBFRQ 399.78 MHz  
 OBSET 4.19 KHz  
 OBFIN 7.29 Hz  
 POINT 13120  
 FREQU 6002.31 Hz  
 SCANS 8  
 ACQTM 2.1837 sec  
 PD 4.0000 sec  
 PW1 5.35 use  
 IRNUC 1H  
 CTEMP 23.7 C  
 SLVNT CDCL3  
 EXREF 0.00 ppm  
 BF 0.12 Hz  
 RGAIN 34

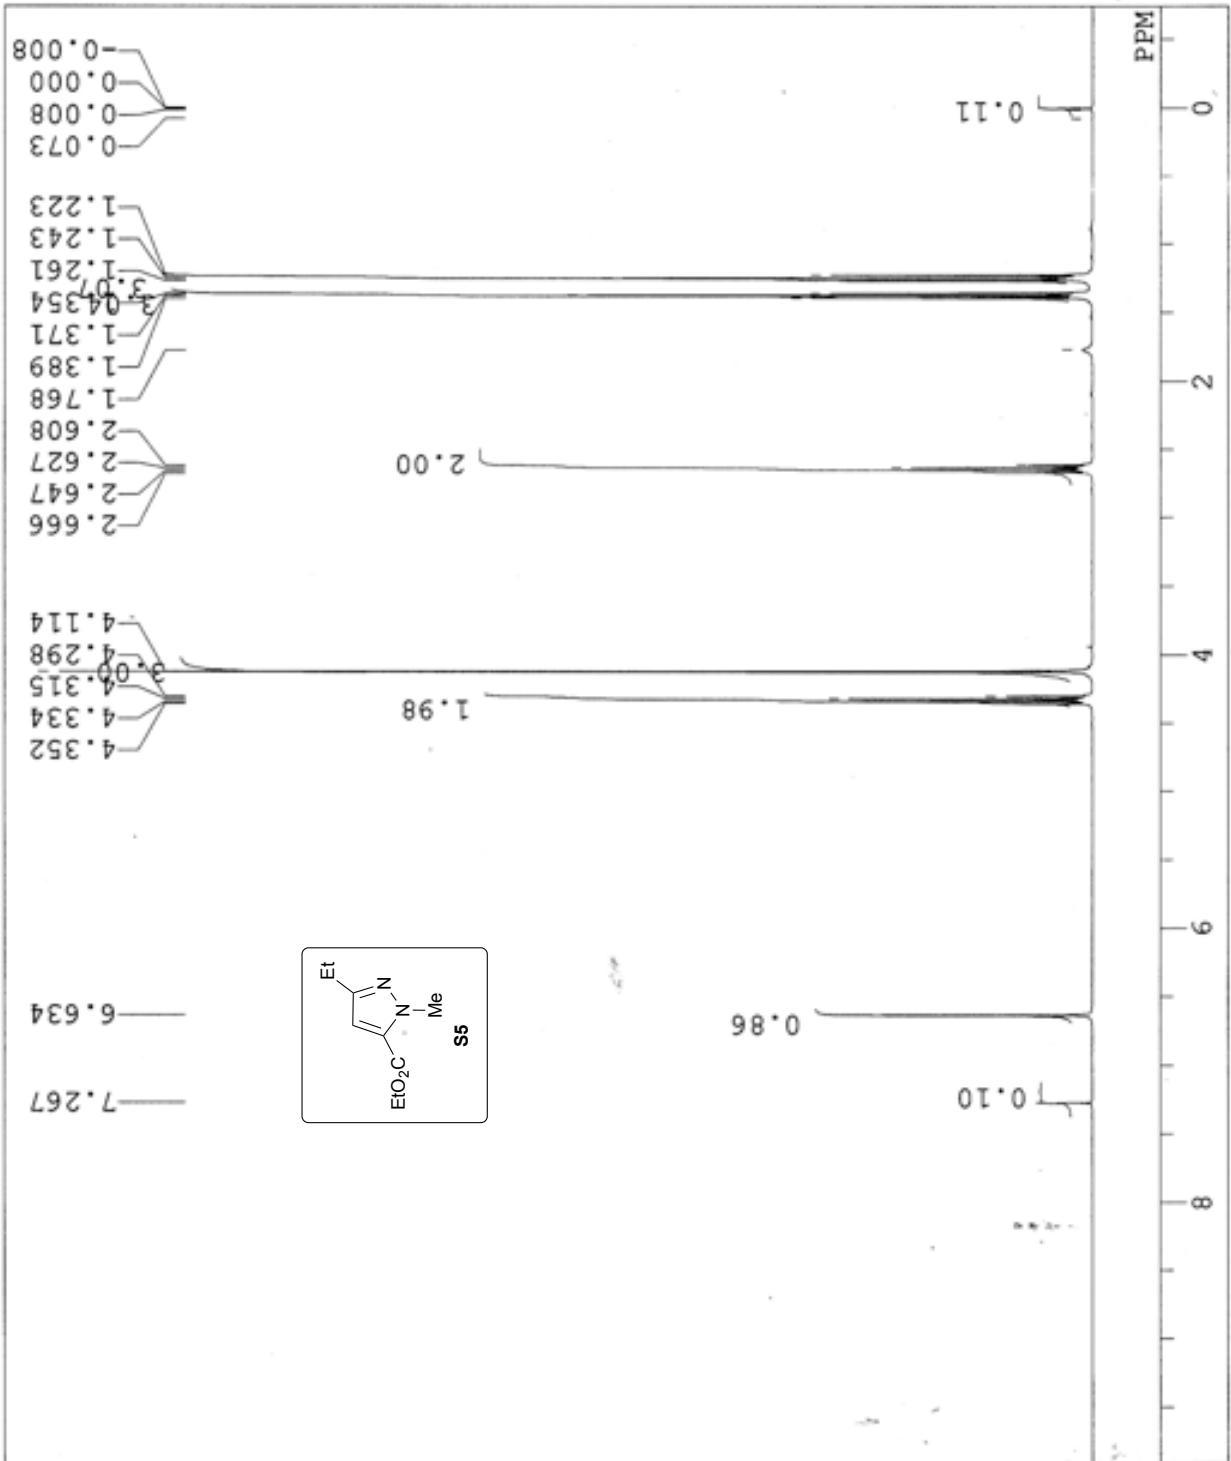

DFILE F:\,t,r,a\@'' fof1  
 COMNT  
 DATIM Mon Sep 13 19:48  
 OBNUC 13C  
 EXMOD bcm  
 OBFRQ 125.65 MHz  
 OBSET 0.00 KHz  
 OBFIN 127958.00 Hz  
 POINT 32768  
 FREQU 33898.30 Hz  
 SCANS 200  
 ACQTM 0.9667 sec  
 PD 2.0333 sec  
 PW1 5.00 use  
 IRNUC 1H  
 CTEMP 26.1 C  
 SLVNT CDCL3  
 EXREF 77.00 ppm  
 BF 1.20 Hz  
 RGAIN 24

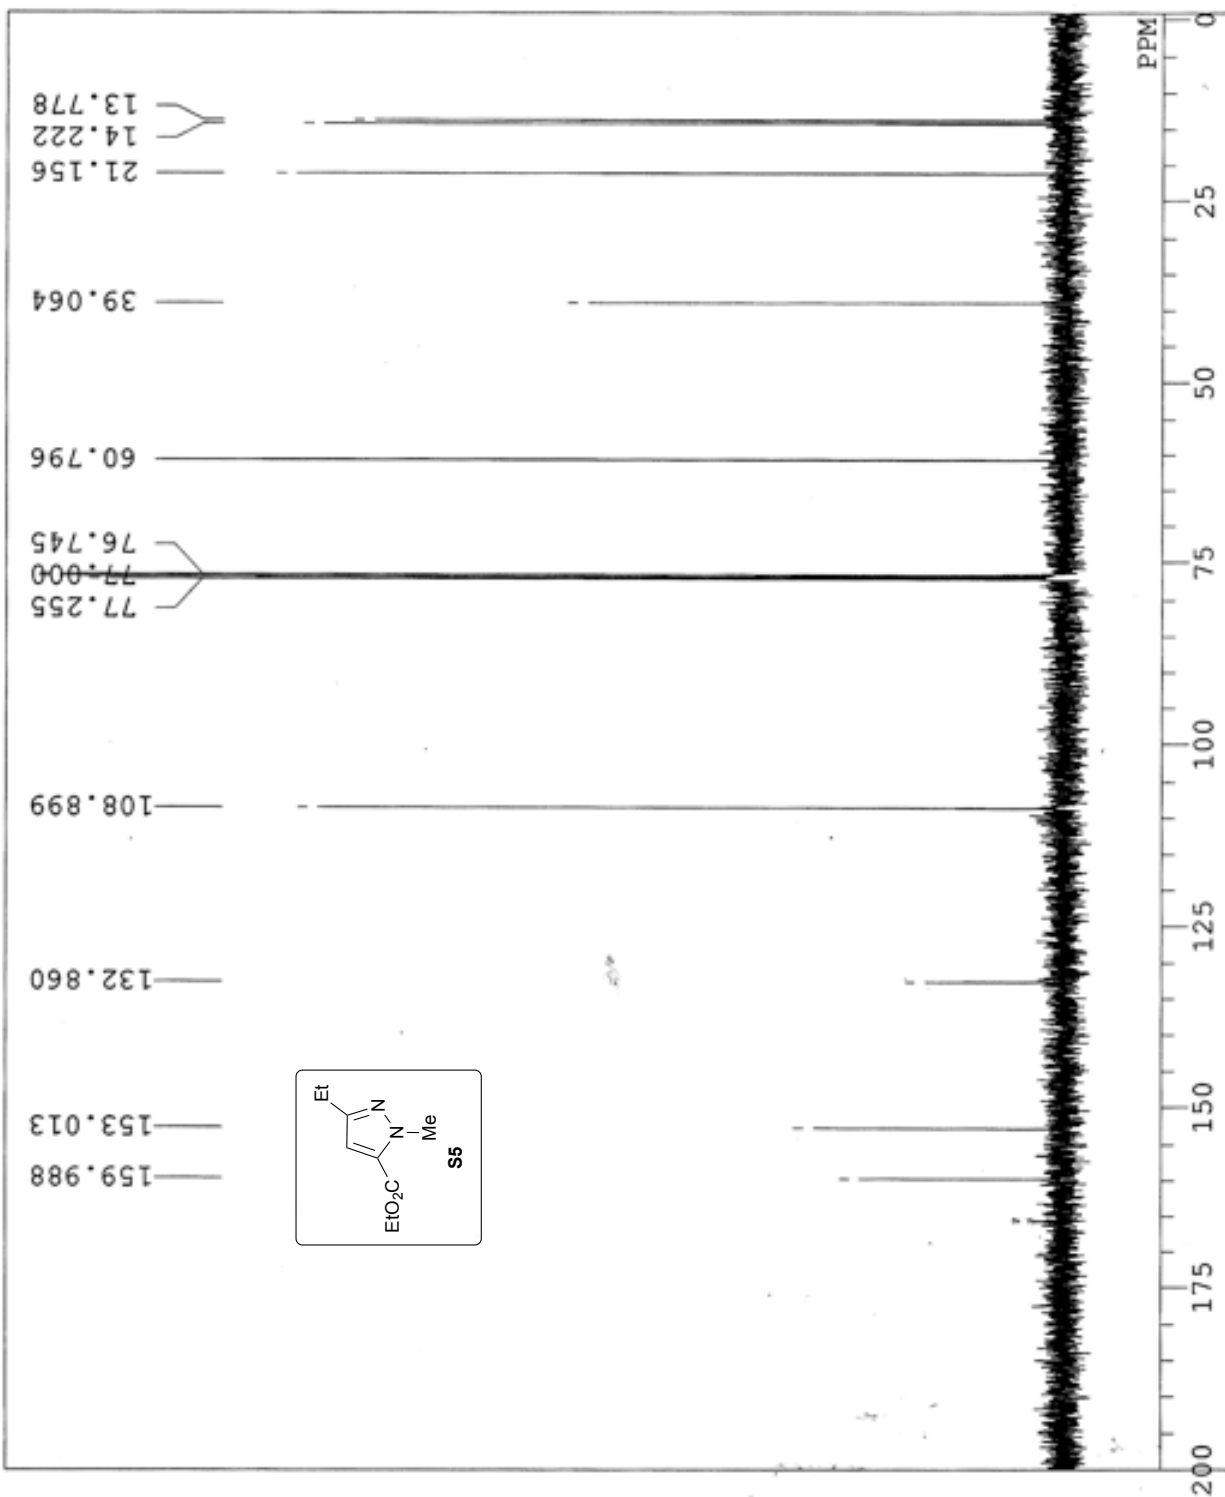



E:\t,r,af@'foft  
 COMNT 0910  
 DATIM Fri Sep 10 22:21  
 OBNUC 1H  
 EXMOD non  
 OBFRQ 500.00 MHz  
 OBSET 0.00 KHz  
 OBFIN 162160.00 Hz  
 POINT 8192  
 FREQU 10000.00 Hz  
 SCANS 16  
 ACQTM 0.8192 sec  
 PD 6.1808 sec  
 PW1 5.70 use  
 IRNUC 1H  
 CTEMP 23.5 C  
 SLVNT CDCL3  
 EXREF 0.00 ppm  
 BF 0.12 Hz  
 RGAIN 13

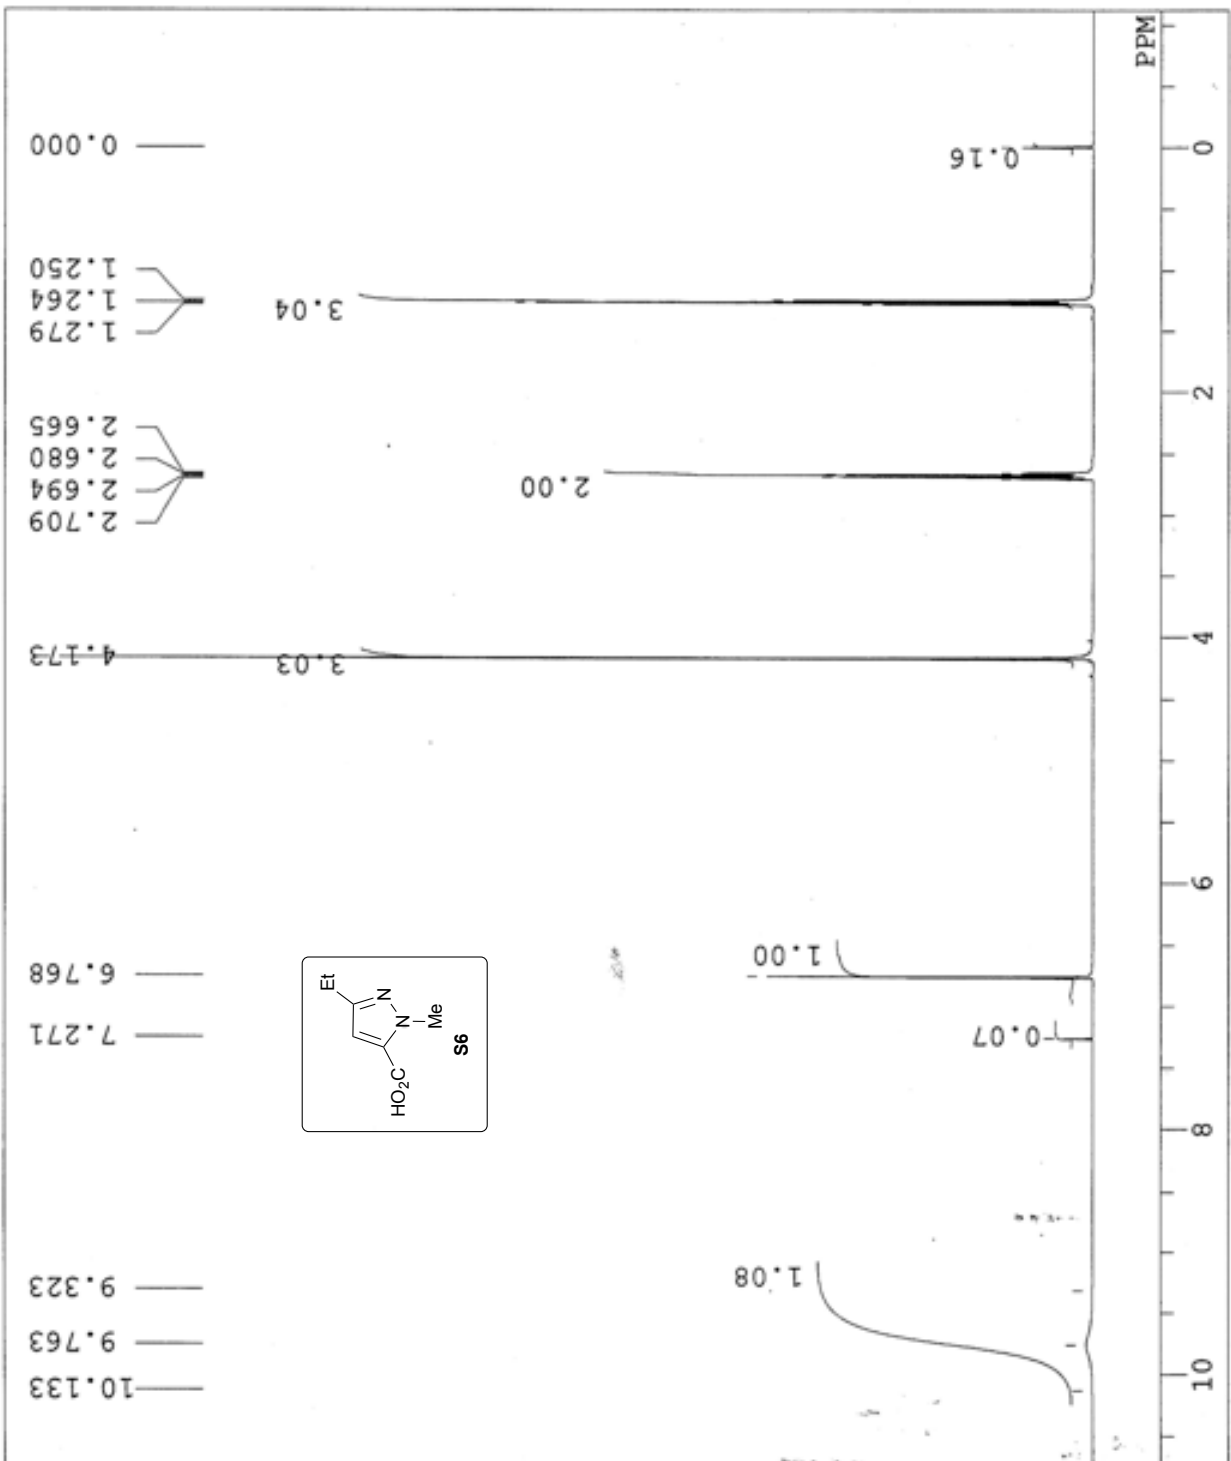

DFILE E:\,t,r,all@' fofl  
 COMNT 0910  
 DATIM Fri Sep 10 22:44  
 OBNUC 13C  
 EXMOD bcm  
 OBFRQ 125.65 MHz  
 OBSET 0.00 KHz  
 OBFIN 127958.00 Hz  
 POINT 32768  
 FREQU 33898.30 Hz  
 SCANS 200  
 ACQTM 0.9667 sec  
 PD 2.0333 sec  
 PW1 5.00 use  
 IRNUC 1H  
 CTEMP 24.6 C  
 SLVNT CDCL3  
 EXREF 77.00 ppm  
 BF 1.20 Hz  
 RGAIN 26

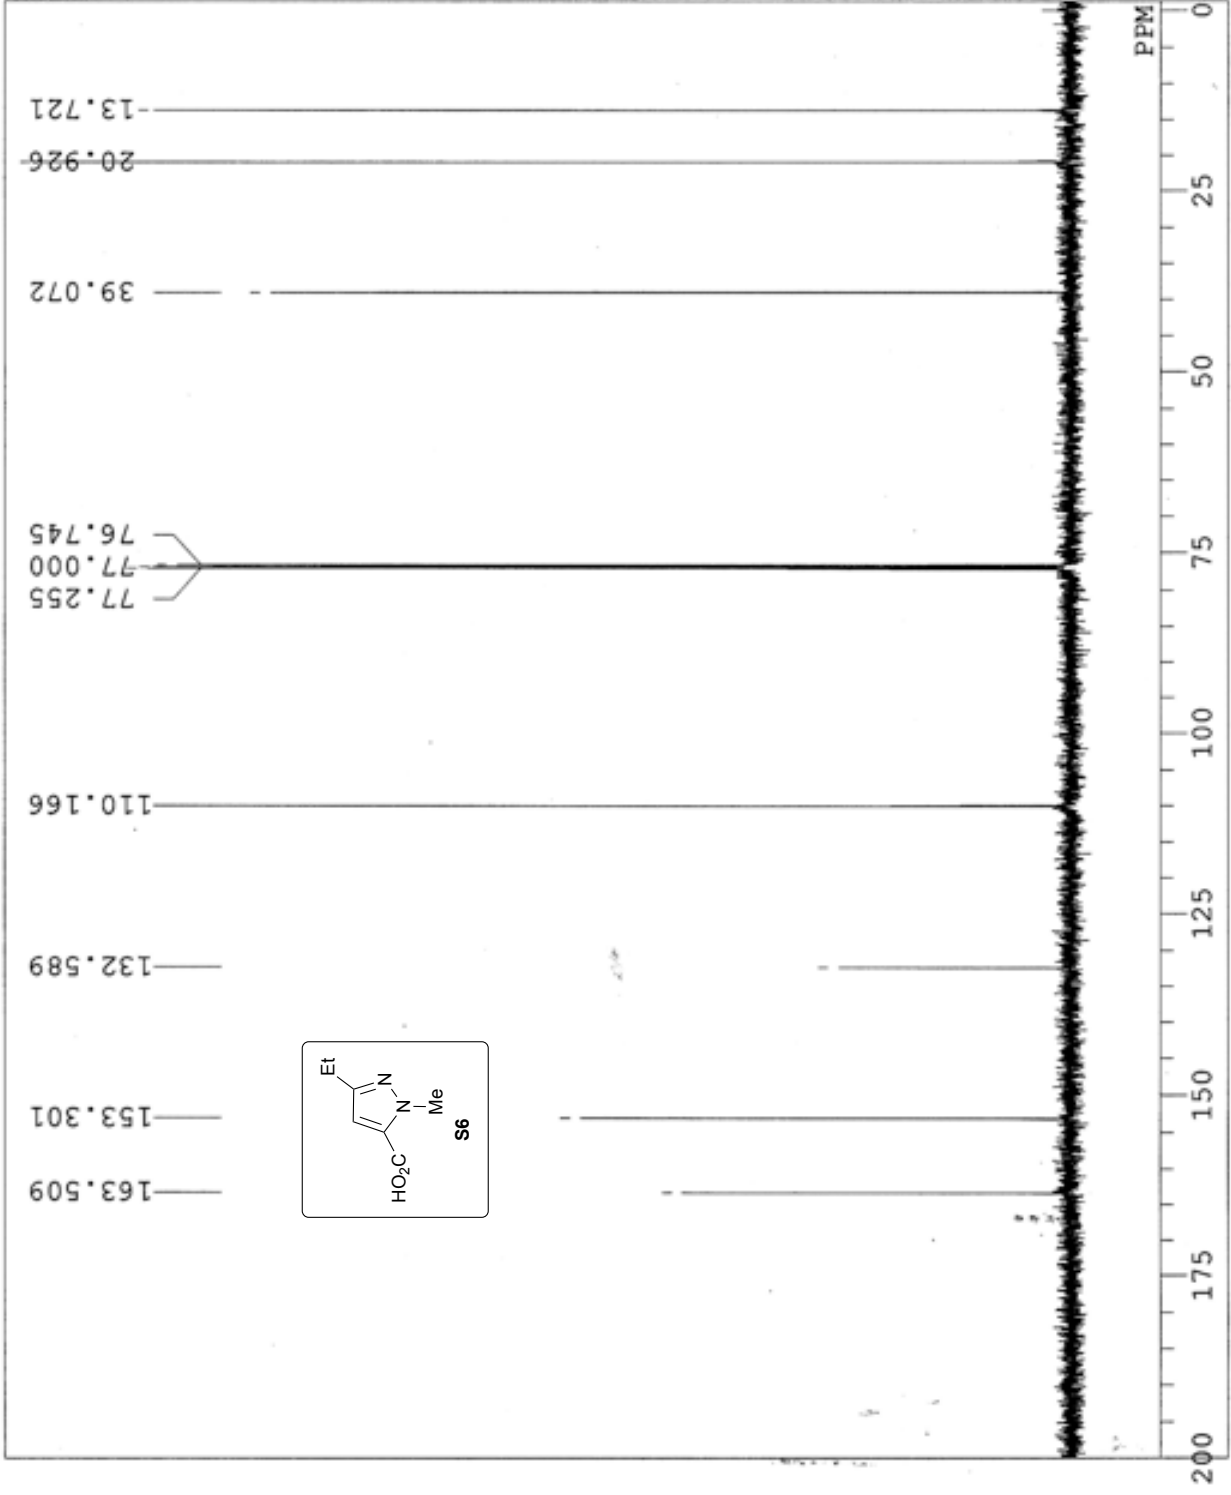

DFILE E:\t,r,a\@''foft  
 COMNT  
 DATIM 13-09-2010 23:53  
 OBNUC 1H  
 EXMOD single\_pulse.ex2  
 OBFRQ 399.78 MHz  
 OBSET 4.19 KHz  
 OBFIN 7.29 Hz  
 POINT 13120  
 FREQU 6002.31 Hz  
 SCANS 8  
 ACQTM 2.1837 sec  
 PD 4.0000 sec  
 PW1 5.35 use  
 IRNUC 1H  
 CTEMP 23.6 C  
 SLVNT CDCL3  
 EXREF 0.00 ppm  
 BF 1.20 Hz  
 RGAIN 38

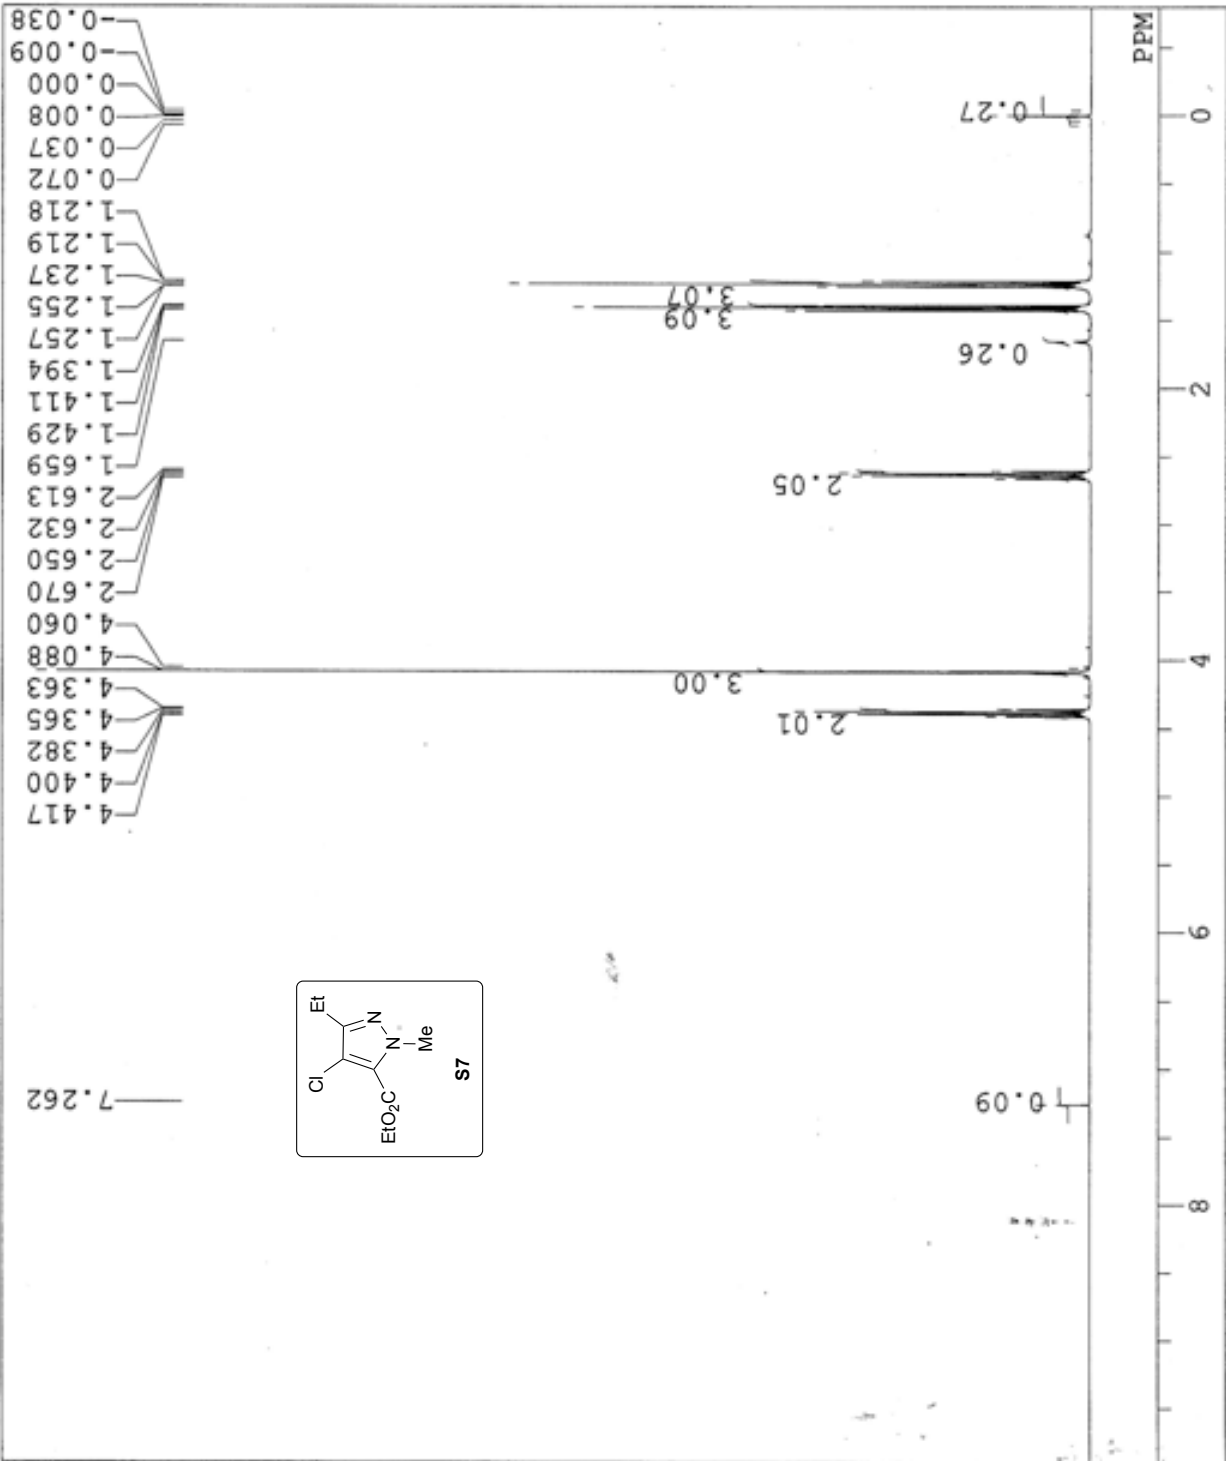

DFILE E:\,t,r,allg" foft  
 COMNT 0913  
 DATIM Mon Sep 13 23:26  
 OBNUC 13C  
 EXMOD bcm  
 OBFRQ 125.65 MHz  
 OBSET 0.00 KHZ  
 OBFIN 127958.00 Hz  
 POINT 32768  
 FREQU 33898.30 Hz  
 SCANS 250  
 ACQTM 0.9667 sec  
 PD 2.0333 sec  
 PW1 5.00 use  
 IRNUC 1H  
 CTEMP 26.6 C  
 SLVNT CDCL3  
 EXREF 77.00 ppm  
 BF 1.20 Hz  
 RGAIN 26

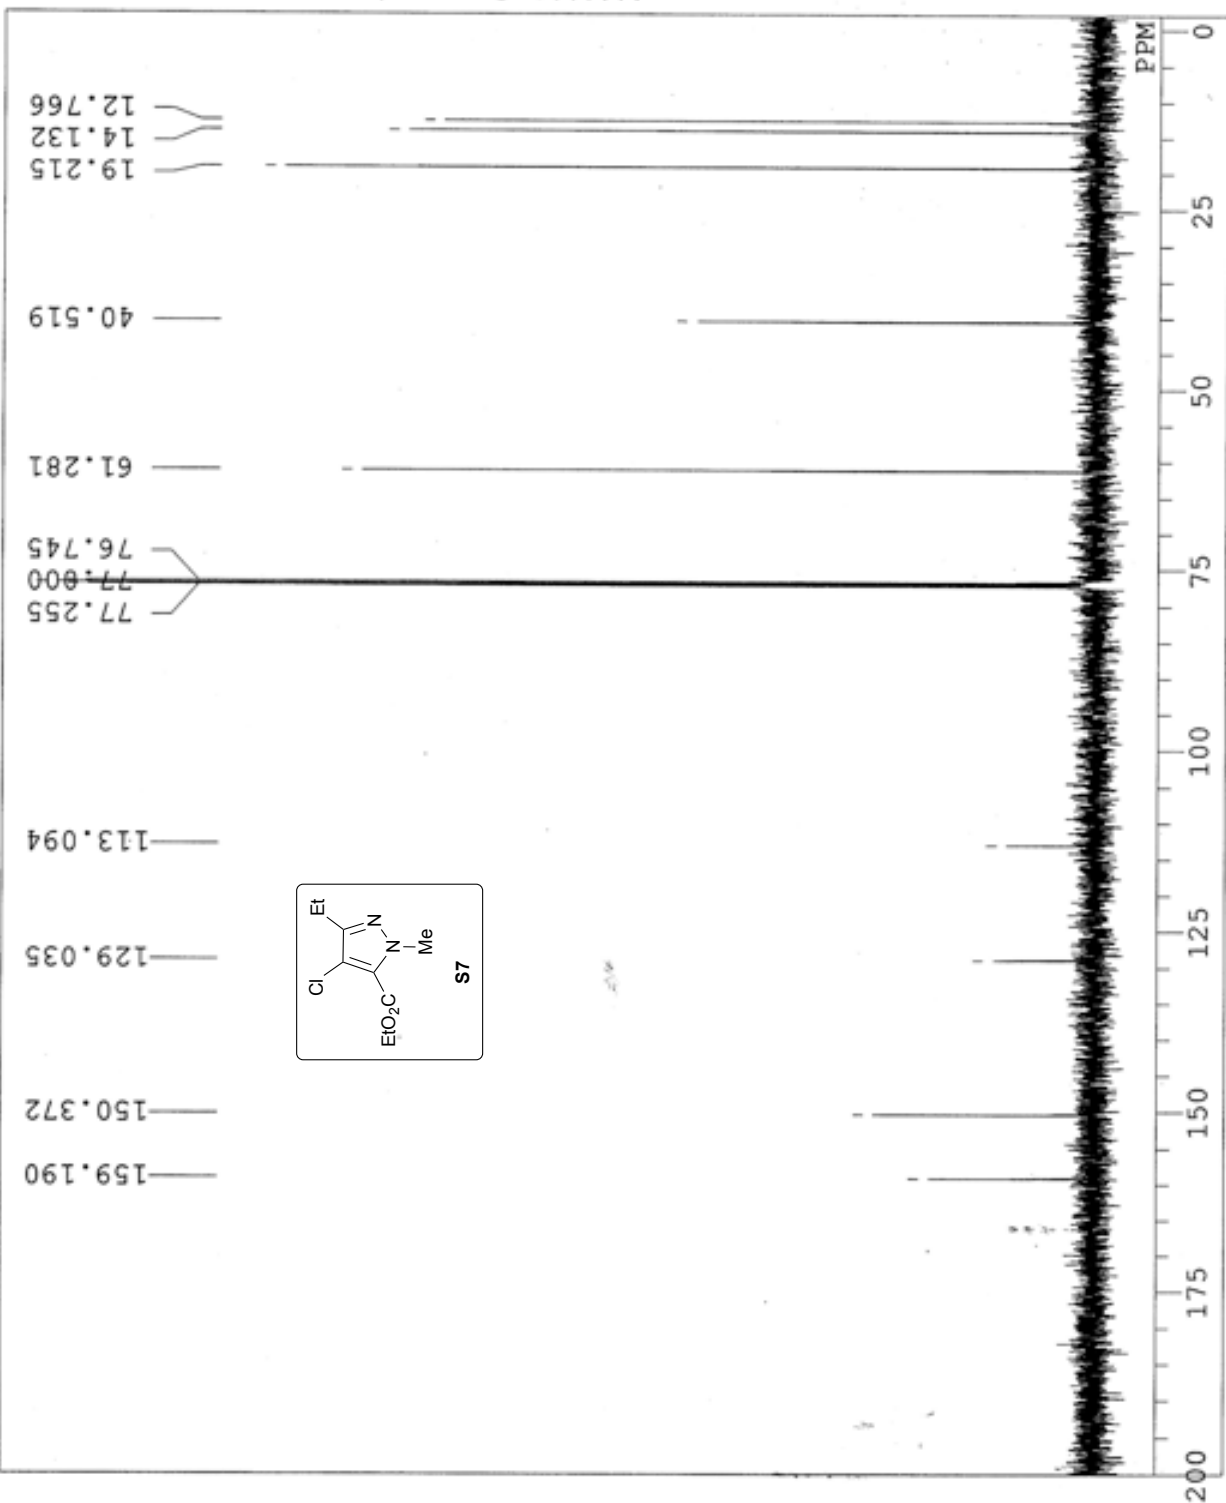

DFILE E:\t,r,alge\rf01  
 COMNT  
 DATIM Sat Sep 11 01:08  
 OBNUC 1H  
 EXMOD non  
 OBFRQ 500.00 MHz  
 OBSET 0.00 KHz  
 OBFIN 162160.00 Hz  
 POINT 16384  
 FREQU 10000.00 Hz  
 SCANS 16  
 ACQTM 1.6384 sec  
 PD 5.3616 sec  
 PW1 5.70 use  
 IRNUC 1H  
 CTEMP 23.1 C  
 SLVNT CDCL3  
 EXREF 0.00 ppm  
 BF 1.20 Hz  
 RGAIN 18

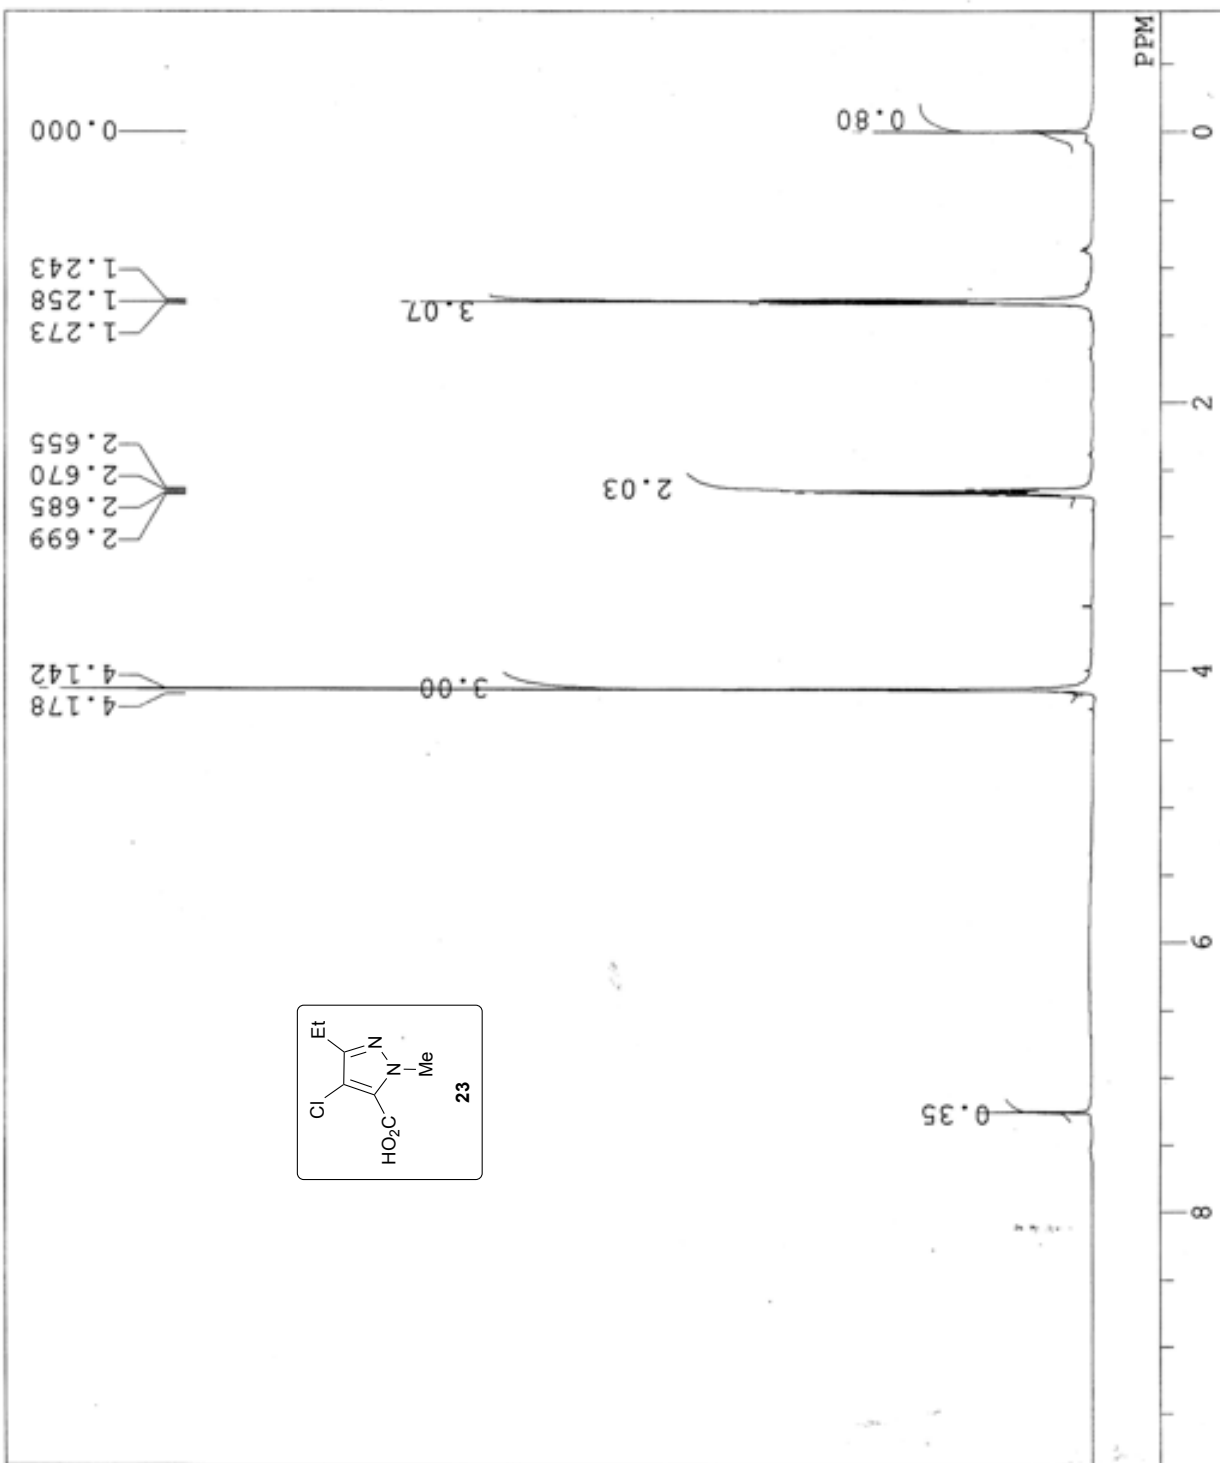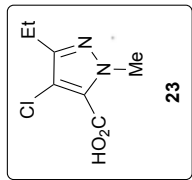

E:\,t,r,a\@''fofl  
 Sat Sep 11 01:39  
 13C  
 bcm  
 125.65 MHz  
 0.00 KHz  
 127958.00 Hz  
 32768  
 33898.30 Hz  
 300  
 0.9667 sec  
 2.0333 sec  
 5.00 use  
 1H  
 24.6 C  
 CDCL3  
 77.00 ppm  
 1.20 Hz  
 26

DFILE  
 COMNT  
 DATIM  
 OBNUC  
 EXMOD  
 OBFRQ  
 OBSET  
 OBFIN  
 POINT  
 FREQU  
 SCANS  
 ACQTM  
 PD  
 PW1  
 IRNUC  
 CTEMP  
 SLVNT  
 EXREF  
 BF  
 RGAIN

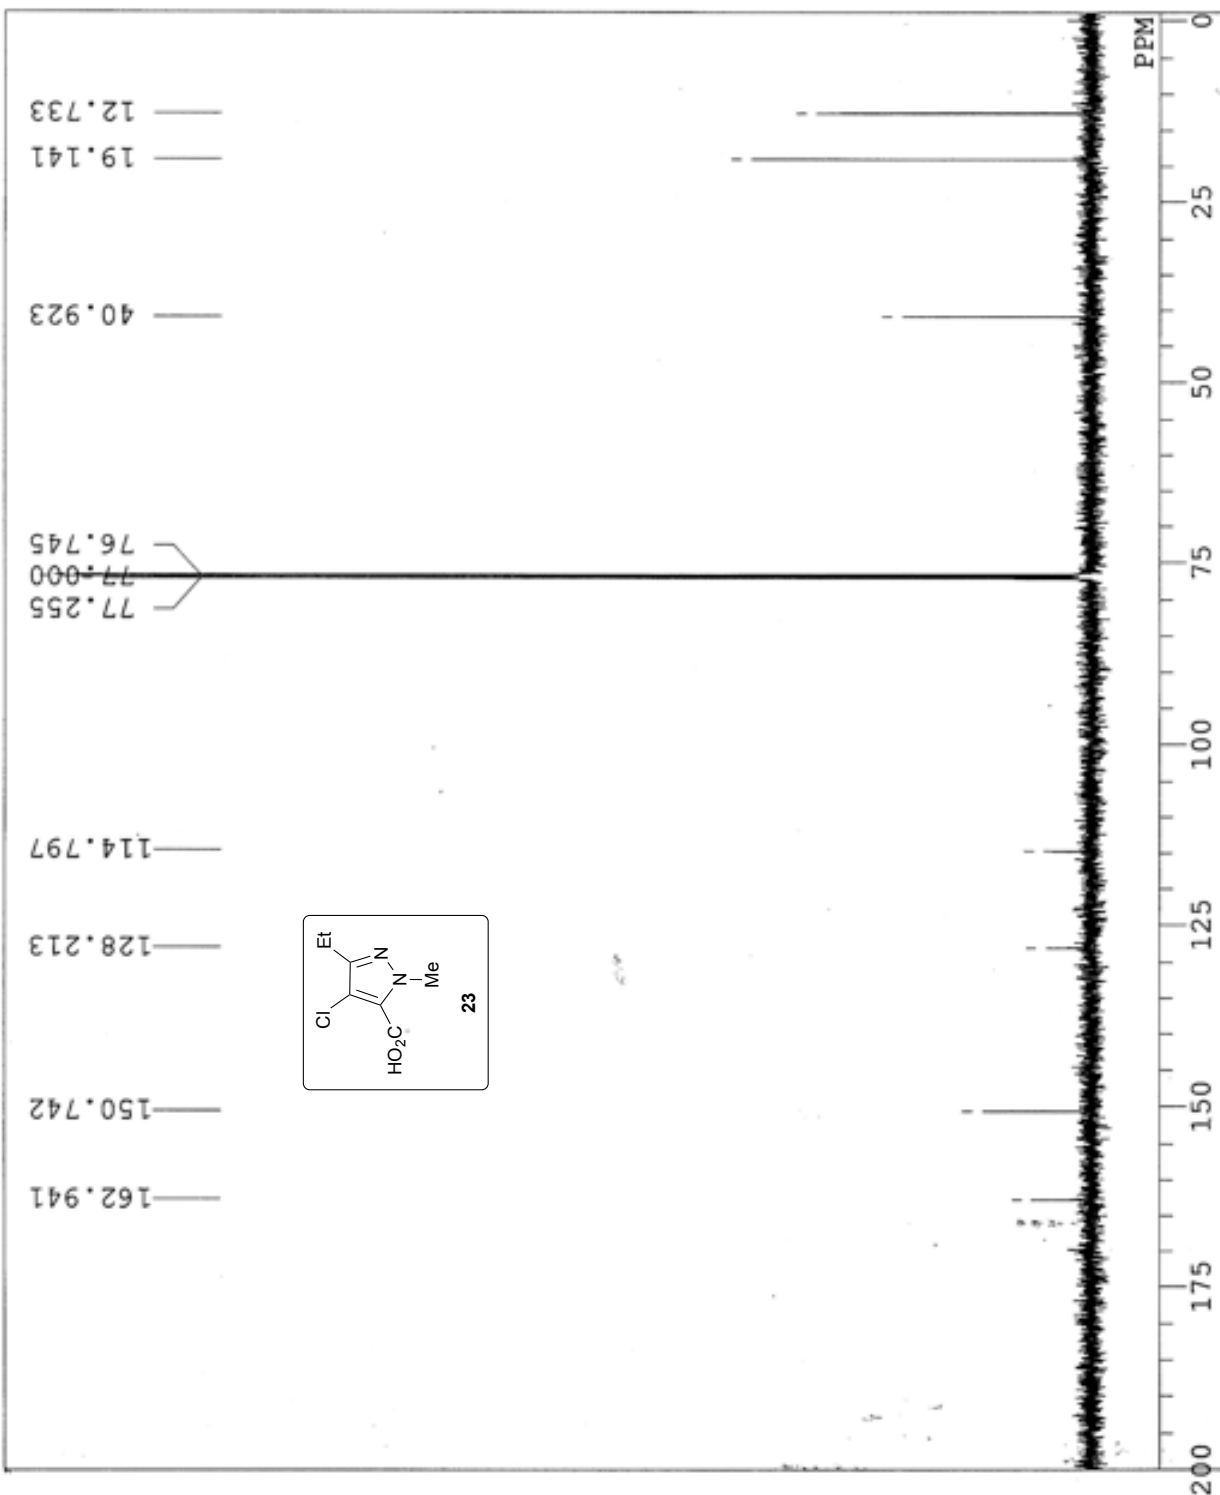

DFILE G:\t,r,a\@'' fofl  
 COMNT  
 DATIM Tue Sep 21 21:30  
 OBNUC 1H  
 EXMOD non  
 OBFRQ 500.00 MHz  
 OBSET 0.00 KHz  
 OBFIN 162160.00 Hz  
 POINT 16384  
 FREQU 10000.00 Hz  
 SCANS 16  
 ACQTM 1.6384 sec  
 PD 2.0000 sec  
 PW1 5.70 use  
 IRNUC 1H  
 CTEMP 23.4 C  
 SLVNT CDCL3  
 EXREF 0.00 ppm  
 BF 0.12 Hz  
 RGAIN 19

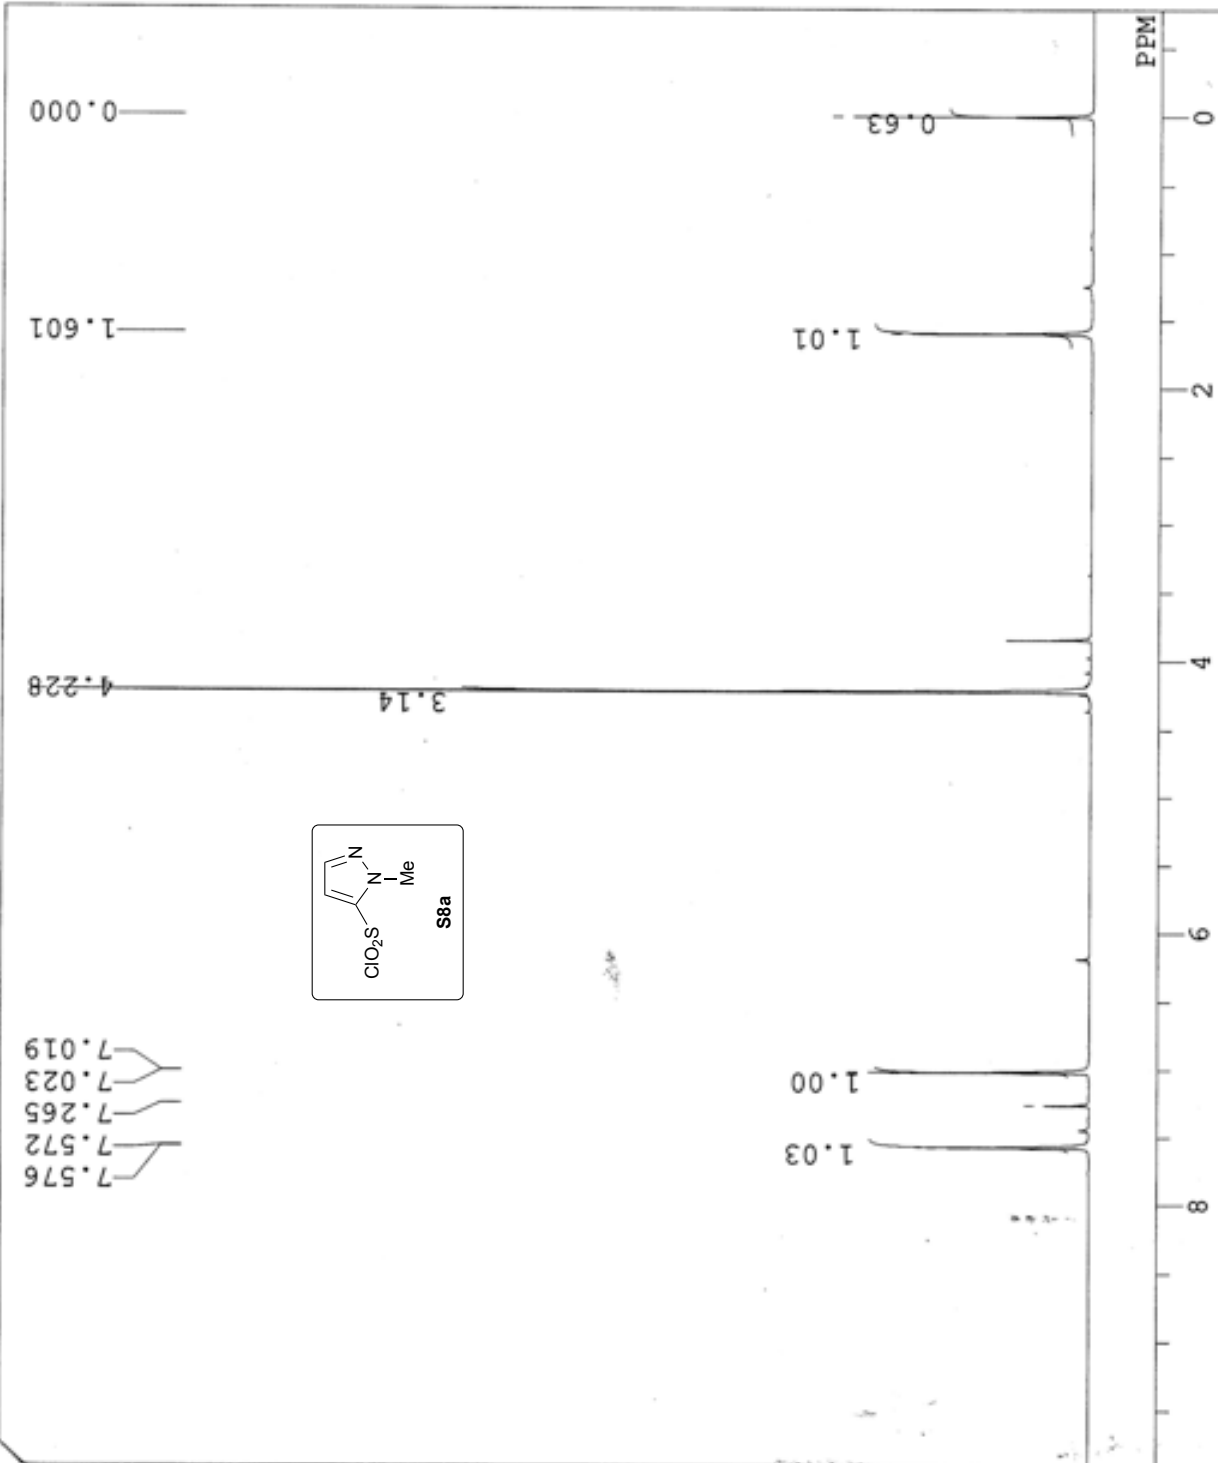

DFILE G:\t,r,a\foft  
 COMNT 0922  
 DATIM Tue Sep 21 23:12  
 OBNUC 13C  
 EXMOD bcm  
 OBFRQ 125.65 MHz  
 OBSET 0.00 KHz  
 OBFIN 127958.00 Hz  
 POINT 32768  
 FREQU 33898.30 Hz  
 SCANS 20  
 ACQTM 0.9667 sec  
 PD 2.0333 sec  
 PW1 5.00 use  
 IRNUC 1H  
 CTEMP 24.6 C  
 SLVNT CDCL3  
 EXREF 77.00 ppm  
 BF 1.20 Hz  
 RGAIN 26

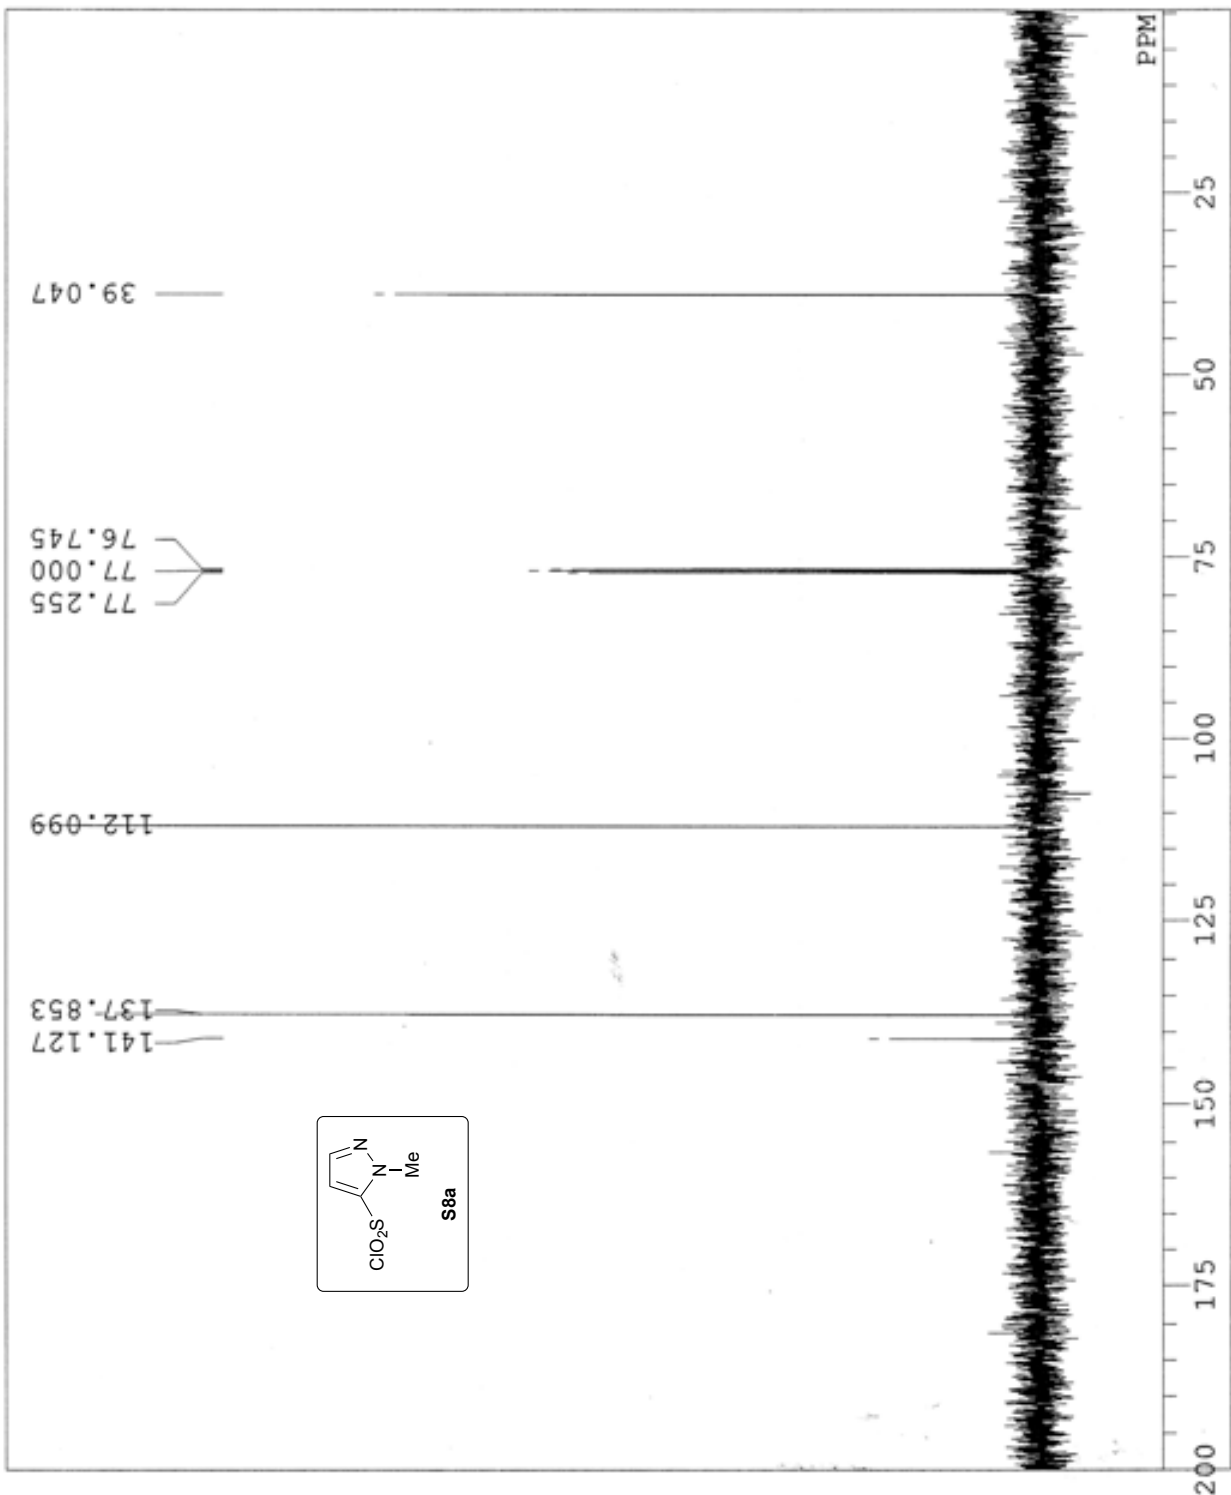



DFILE F:\,t,r,all@' fofit  
 COMNT Thu Sep 16 14:46  
 DATIM 1H  
 OBNUC non  
 EXMOD 500.00 MHz  
 OBFRQ 0.00 KHz  
 OBSET 162160.00 Hz  
 OBFIN 16384  
 POINT 10000.00 Hz  
 FREQU 16  
 SCANS 1.6384 sec  
 ACQTM 5.3620 sec  
 PD 5.70 use  
 FW1 1H  
 IRNUC 23.9 C  
 CTEMP CDCL3  
 SLVNT 0.00 ppm  
 EXREF 1.20 Hz  
 BF -22  
 RGAIN

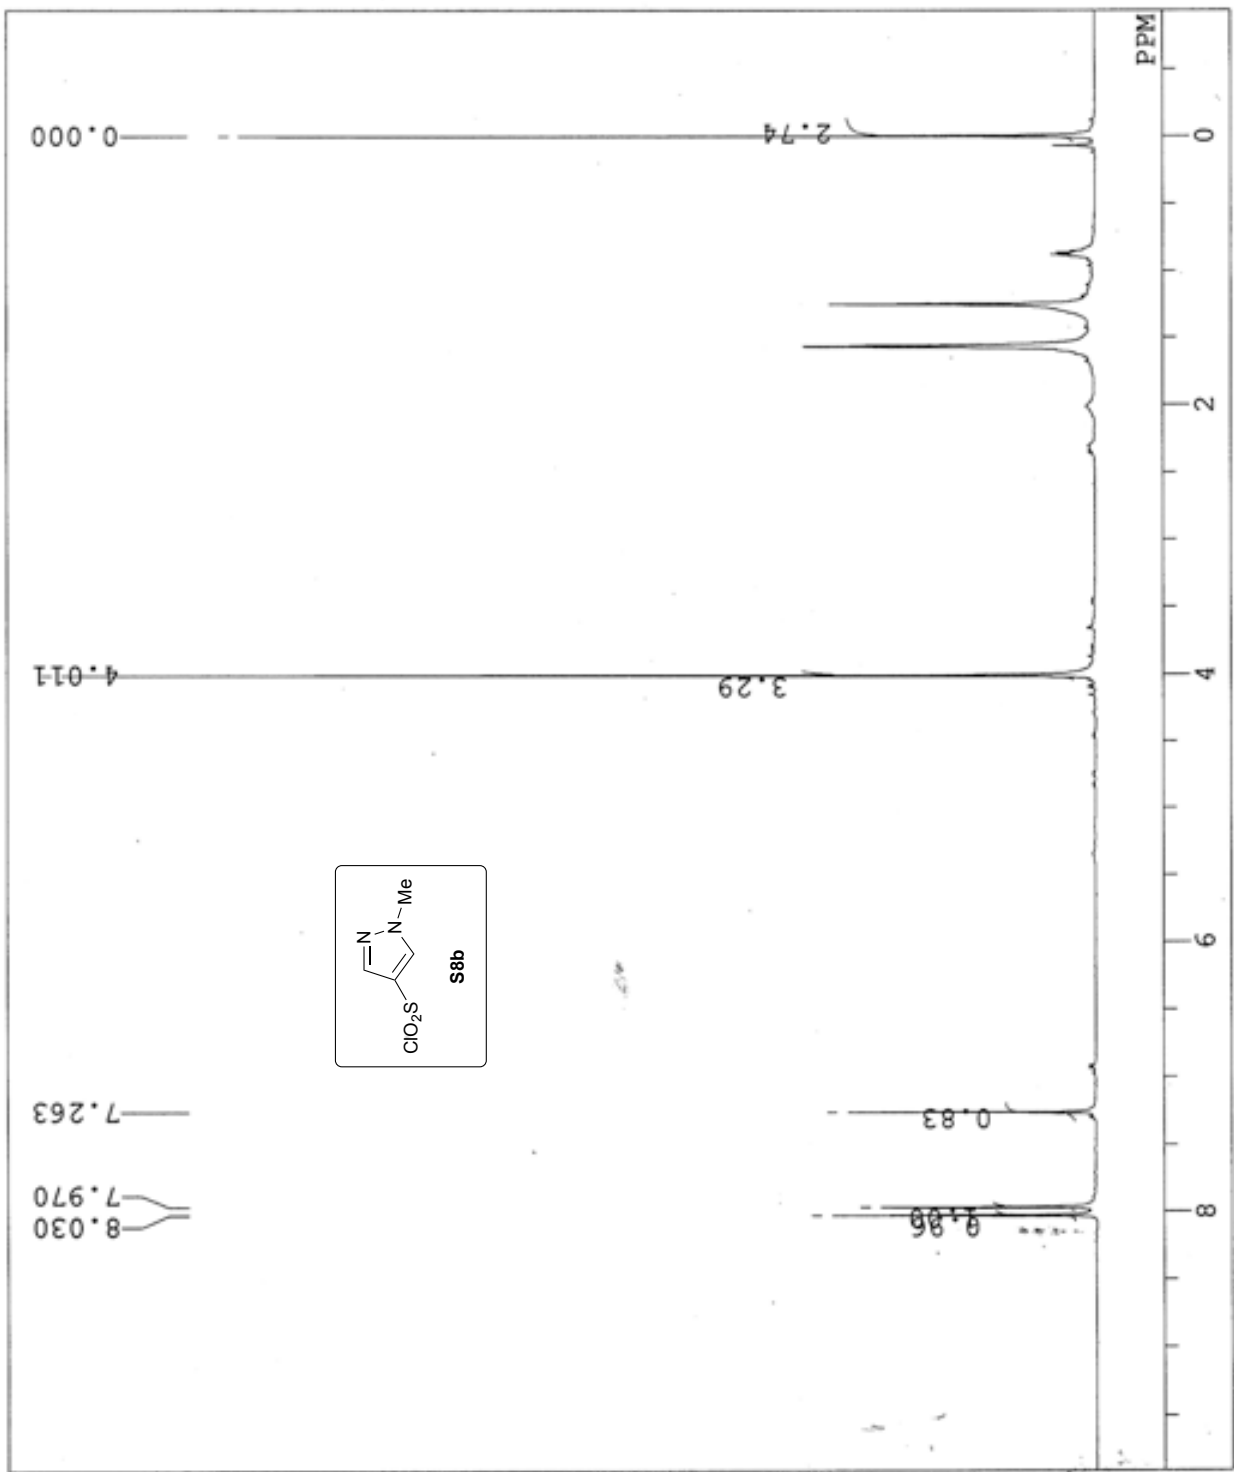

DFILE F:\,t,r,alle" fofit  
 COMNT 0725  
 DATIM Fri Jul 25 15:05  
 OBNUC 13C  
 EXMOD bcm  
 OBFRQ 125.65 MHz  
 OBSET 0.00 KHz  
 OBFIN 127958.00 Hz  
 POINT 32768  
 FREQU 33898.30 Hz  
 SCANS 500  
 ACQTM 0.9667 sec  
 PD 2.0333 sec  
 PW1 5.00 use  
 IRNUC 1H  
 CTEMP 23.1 c  
 SLVNT CDCL3  
 EXREF 77.00 ppm  
 BF 1.20 Hz  
 RGAIN 28

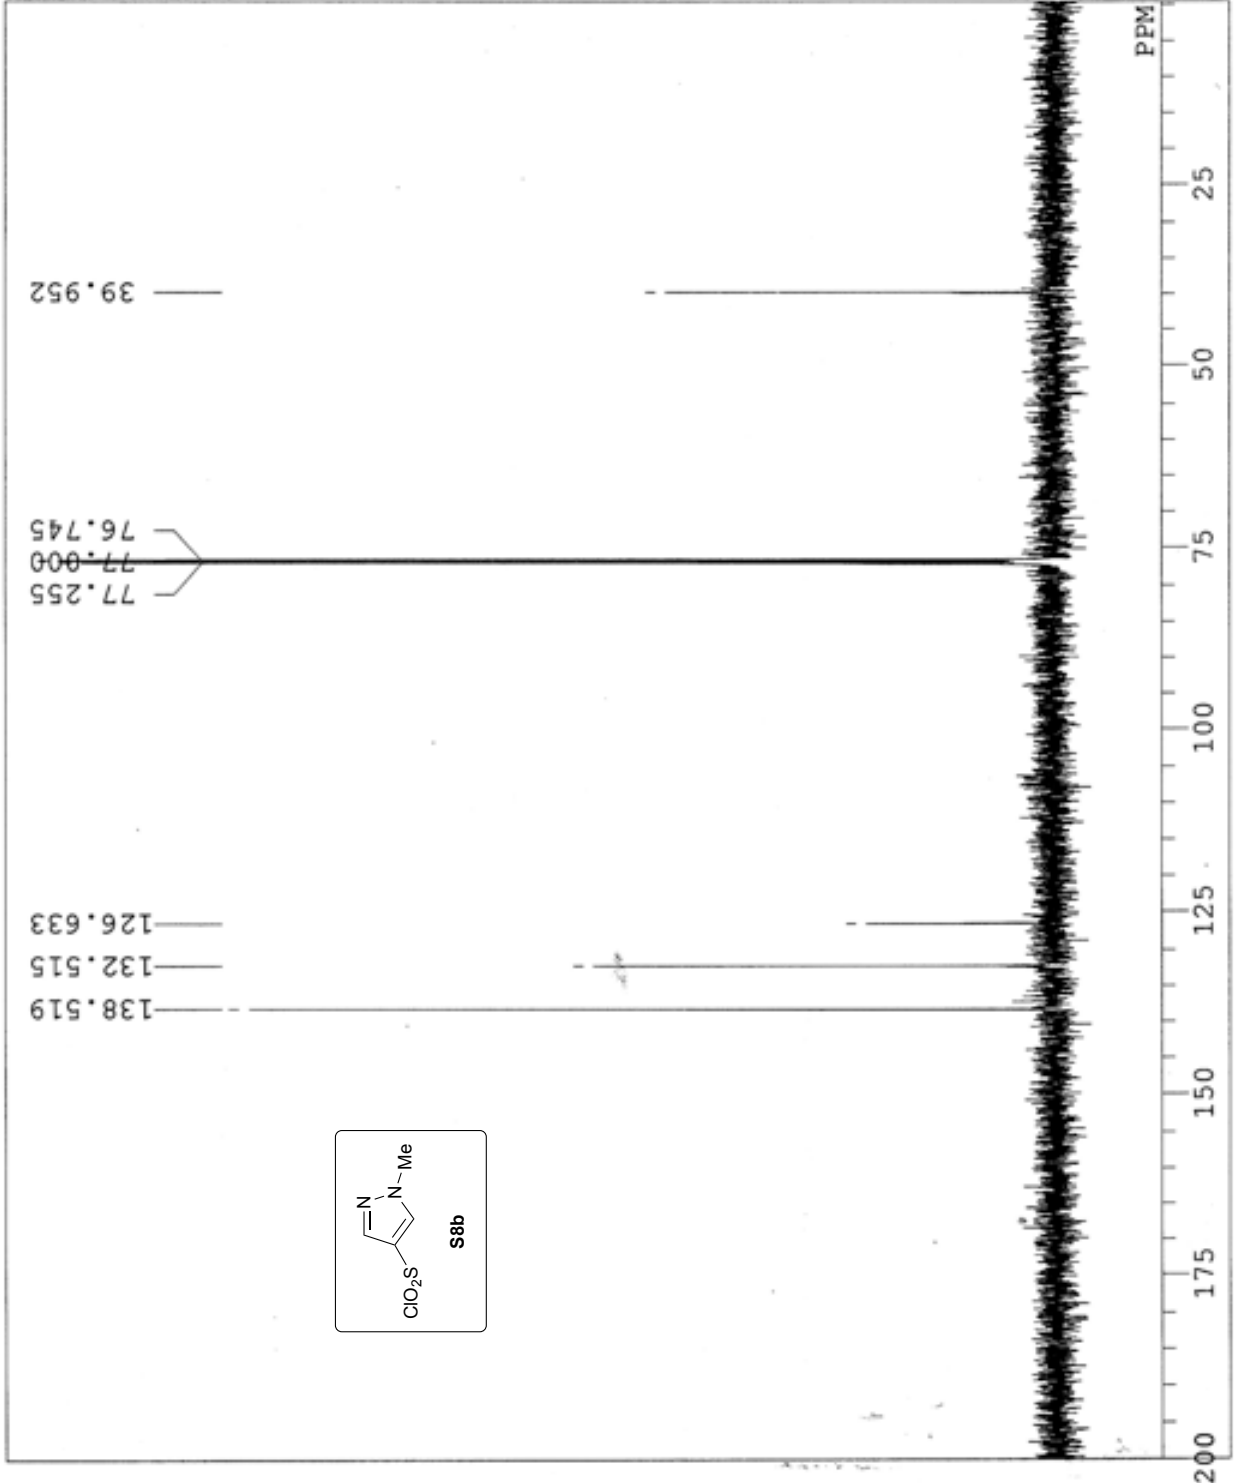

Supplement: d2ra02399g1.pdf [file d2ra02399g1.pdf]
